# Supplementary material for: The timing of childhood adversity associates with epigenetic patterns across childhood and adolescence: results from a prospective, longitudinal study
Source: PubMed Central journal article supplement (PMC10527482; doi:10.1016/s2352-4642(23)00127-x), 2023-06-14
Supplement: NIHMS1910811-supplement-MMC1.pdf [file NIHMS1910811-supplement-MMC1.pdf]

# THE LANCET

## Child & Adolescent Health

### Supplementary appendix

This appendix formed part of the original submission and has been peer reviewed. We post it as supplied by the authors.

Supplement to: Lussier AA, Zhu Y, Smith BJ, et al. Association between the timing of childhood adversity and epigenetic patterns across childhood and adolescence: findings from the Avon Longitudinal Study of Parents and Children (ALSPAC) prospective cohort. *Lancet Child Adolesc Health* 2023; published online June 13. [https://doi.org/10.1016/S2352-4642\(23\)00127-X](https://doi.org/10.1016/S2352-4642(23)00127-X).

## TABLE OF CONTENTS

|                                                                                                                                                           |           |
|-----------------------------------------------------------------------------------------------------------------------------------------------------------|-----------|
| <b>SUPPLEMENTAL METHODS</b> .....                                                                                                                         | <b>3</b>  |
| <b>Discovery cohort – the Avon Longitudinal Study of Parents and Children</b> .....                                                                       | <b>3</b>  |
| Sample description .....                                                                                                                                  | 3         |
| DNA methylation profiling .....                                                                                                                           | 3         |
| DNA methylation pre-processing and normalization .....                                                                                                    | 3         |
| Coding of covariates .....                                                                                                                                | 3         |
| <b>Structured Life Course Modeling Approach (SLCMA)</b> .....                                                                                             | <b>4</b>  |
| <b>Biological implications of loci associated with childhood adversity identified from SLCMA</b> .....                                                    | <b>4</b>  |
| <b>Internal validation of age 15 loci using non-parametric bootstrapping</b> .....                                                                        | <b>5</b>  |
| <b>Adjusting for exposure to other childhood adversities</b> .....                                                                                        | <b>6</b>  |
| <b>Replication cohort – The Raine Study</b> .....                                                                                                         | <b>7</b>  |
| Sample description .....                                                                                                                                  | 7         |
| DNA methylation profiling .....                                                                                                                           | 7         |
| Childhood adversity (one-adult households) .....                                                                                                          | 7         |
| Covariates .....                                                                                                                                          | 7         |
| <b>Replication cohort – Future of Families and Child Wellbeing Study (FFCWS)</b> .....                                                                    | <b>7</b>  |
| Sample description .....                                                                                                                                  | 7         |
| DNA methylation profiling .....                                                                                                                           | 8         |
| Childhood adversity .....                                                                                                                                 | 8         |
| Covariates .....                                                                                                                                          | 8         |
| <b>Replication analyses</b> .....                                                                                                                         | <b>8</b>  |
| Winner’s curse correction of top ALSPAC loci .....                                                                                                        | 8         |
| Replication in the Raine Study Generation 2 .....                                                                                                         | 9         |
| Replication in the FFCWS cohort .....                                                                                                                     | 9         |
| <b>Testing for potential confounding effects of the relationship between childhood adversity and DNA methylation levels at age 7 and 15</b> .....         | <b>10</b> |
| Early-life confounders of childhood adversity and DNAm at age 7 and 15 .....                                                                              | 10        |
| Adolescent-specific factors mediating the relationship between childhood adversity and DNAm .....                                                         | 10        |
| <b>Types of DNAm trajectories across development for age 15 loci</b> .....                                                                                | <b>12</b> |
| <b>Investigating adversity-DNAm relationships within a threat and deprivation paradigm</b> .....                                                          | <b>13</b> |
| <b>References</b> .....                                                                                                                                   | <b>13</b> |
| <b>SUPPLEMENTAL TABLES</b> .....                                                                                                                          | <b>16</b> |
| <b>Table S1. Summary of the childhood adversity variables analyzed in the present study.</b> .....                                                        | <b>16</b> |
| <b>Table S2. Distribution of the accumulation score for each type of adversity</b> .....                                                                  | <b>18</b> |
| <b>Table S3. Distribution of covariates in the total ALSPAC sample, ARIES subsample, and among those exposed to any adversity between age 0-11.</b> ..... | <b>19</b> |
| <b>Table S4. Prevalence and correlations between adversities occurring from age 0-11.</b> .....                                                           | <b>20</b> |
| <b>Table S5. Annotated loci identified at age 15.</b> .....                                                                                               | <b>21</b> |
| <b>Table S6. Correlation of DNAm in brain and blood for age 15 loci.</b> .....                                                                            | <b>23</b> |
| <b>Table S7. Associations between childhood adversity and age 15 DNAm using non-parametric bootstrap.</b> .....                                           | <b>25</b> |
| <b>Table S8. Replication of one-adult household associations in the Raine Study.</b> .....                                                                | <b>27</b> |
| <b>Table S9. Replication of childhood adversity associations in the FFCWS cohort.</b> .....                                                               | <b>28</b> |
| <b>Table S10. Sensitivity analysis of DNA methylation at birth (cord blood) for loci identified at age 15.</b> .....                                      | <b>30</b> |
| <b>Table S11. Associations between adversity and DNA methylation at age 7 (whole blood) for loci identified at age 15.</b> .....                          | <b>32</b> |
| <b>Table S12. Types of longitudinal DNAm trajectories in response to childhood adversity for top adolescent loci.</b> .....                               | <b>34</b> |
| <b>Table S13. Persistence of differential DNA methylation patterns identified at age 7 (whole blood) into adolescence (age 15).</b> .....                 | <b>36</b> |
| <b>SUPPLEMENTAL FIGURES</b> .....                                                                                                                         | <b>38</b> |
| <b>Figure S1. Flow-chart of analyses</b> .....                                                                                                            | <b>38</b> |
| <b>Figure S2. Directed acyclic graphs (DAGs) of primary and sensitivity analyses</b> .....                                                                | <b>39</b> |

|                                                                                                                                          |    |
|------------------------------------------------------------------------------------------------------------------------------------------|----|
| Figure S3. Quantile-Quantile plots of the epigenome-wide analyses.....                                                                   | 40 |
| Figure S4. Summary of prevalence and correlations between adversities from age 0-11.....                                                 | 41 |
| Figure S5. Genomic locations of top age 15 loci compared to all sites tested (n=302,581). ....                                           | 42 |
| Figure S6. Brain-blood correlations for top loci identified at age 15. ....                                                              | 43 |
| Figure S7. Enrichment of Gene Ontology (GO) term clusters for top loci at age 15 using DAVID.....                                        | 44 |
| Figure S8. Enrichment of Gene Ontology (GO) term for top loci at age 15 using missMethyl. ....                                           | 45 |
| Figure S9. Genes annotated to top age 15 loci were no more highly constrained than all sites.....                                        | 46 |
| Figure S10. Non-parametric bootstrapping of associations between childhood adversity and DNAm at<br>age 15. ....                         | 47 |
| Figure S11. Significance levels for mutually-adjusted models of adversity and age 15 DNAm.....                                           | 48 |
| Figure S12. Change in effects estimates for mutually-adjusted models of adversity and age 15 DNAm.....                                   | 49 |
| Figure S13. Average differences across mutually-adjusted models of exposure to childhood adversity<br>and DNA methylation at age 15..... | 50 |
| Figure S14. Summary of replication cohorts .....                                                                                         | 51 |
| Figure S15. Replication of one-adult household associations in the Raine Study .....                                                     | 52 |
| Figure S16. Replication of associations in the FFCWS cohort.....                                                                         | 53 |
| Figure S17. Population and individual-level stability of DNAm from birth to adolescence of top loci .....                                | 54 |
| Figure S18. Accounting for potential confounders and mediators of adversity-DNAm relationships.....                                      | 55 |
| Figure S19. Effects of early-life confounders on associations between adversity and DNAm at age 15. ....                                 | 56 |
| Figure S20. Effects of early-life confounders on associations between adversity and DNAm at age 7. ....                                  | 57 |
| Figure S21. Age at pubertal onset did not mediate childhood adversity-DNAm relationships. ....                                           | 58 |
| Figure S22. Body mass index at age 15 putatively mediated childhood adversity-DNAm relationships.....                                    | 59 |
| Figure S23. C-reactive protein levels at age 15 putatively mediated childhood adversity-DNAm<br>relationships. ....                      | 60 |
| Figure S24. The adolescent's daily smoking at age 15 did not mediate childhood adversity-DNAm<br>relationships. ....                     | 61 |
| Figure S25. Selection metrics for the number of types of DNAm trajectories across development. ....                                      | 62 |
| Figure S26. Hierarchical clustering of CpGs based on a five-trajectory model.....                                                        | 63 |
| Figure S27. Distinguishing features between the six types of DNA methylation trajectories. ....                                          | 64 |
| Figure S28. Types of DNAm trajectories for the 41 loci identified at age 15.....                                                         | 65 |
| Figure S29. Types of trajectories based on the significance threshold of top loci. ....                                                  | 66 |
| Figure S30. Enrichment of top adolescent loci within the threat versus deprivation paradigm. ....                                        | 67 |

## SUPPLEMENTAL METHODS

### Discovery cohort – the Avon Longitudinal Study of Parents and Children

#### *Sample description*

Data came from the Avon Longitudinal Study of Parents and Children (ALSPAC), a longitudinal birth cohort of children born to mothers who were living in the county of Avon, England, with expected delivery dates between April 1991 and December 1992(1, 2). The main goal of the ALSPAC study is to increase knowledge of the pathways influencing lifelong health, with a focus on the genetic and environmental determinants of health and disease. A total of 14,451 pregnant women participated in the study and of 14,062 of eligible live births who were alive at one year of age (n=13,988 children) were enrolled in the study. Please note that the study website contains details of all the data that is available through a fully searchable data dictionary and variable search tool: <http://www.bristol.ac.uk/alspac/researchers/our-data/>.

Ethical approval for the study was obtained from the ALSPAC Ethics and Law Committee and the Local Research Ethics Committees. Consent for biological samples has been collected in accordance with the Human Tissue Act (2004). Informed consent for the use of data collected via questionnaires and clinics was obtained from participants following the recommendations of the ALSPAC Ethics and Law Committee at the time. All data are available by request from the ALSPAC Executive Committee for researchers who meet the criteria for access to confidential data (<http://www.bristol.ac.uk/alspac/researchers/access/>). Secondary analyses of ALSPAC data were approved with oversight by the Mass General Brigham Institutional Review Boards (IRB) (Protocol 2017P001110).

#### *DNA methylation profiling*

The analytic sample came from a subsample of ALSPAC, the Accessible Resource for Integrated Epigenomics Studies (ARIES). The subsample consisted of 1,018 mother-child pairs from whom blood-based DNA methylation data were collected. Participants in the ARIES subsample were randomly selected from ALSPAC participants with complete data across at least five timepoints of data collection (3). Three timepoints of DNAm were collected, including cord blood at birth (n=905), whole blood at age 7 (n=970), and peripheral blood mononuclear cells at age 15 (n=966). 846 individuals had DNAm collected at all three timepoints. Number of samples are based on the number of samples with available data after the pre-processing procedures described in the main text.

#### *DNA methylation pre-processing and normalization*

DNAm data were processed using the *meffil* package in R, which performs background correction and functional normalization of DNAm data (4). Twins and samples with >10% of CpG sites with a detection p-value >0.01 or a bead count <3 were removed, as were cross-hybridizing probes and polymorphic probes. To remove possible outliers, we winsorized the beta values (i.e., values that represent the percent of methylation at each CpG site), setting the bottom 5% and top 5% of values to the 5th and 95th quantile, respectively (5). Finally, we removed probes showing little variability across individuals, defined as CpGs with <5% difference in DNAm between the 10<sup>th</sup> and 90<sup>th</sup> percentile of values. The final analytic sample after pre-processing consisted of 966 youths and 302,581 CpGs with DNAm data measured at age 15. DNAm measured at age 0 and 7 were similarly pre-processed and normalized.

#### *Covariates*

Across all ALSPAC analyses, we controlled for the following covariates, which were measured at birth and coded as follows. We have extensively investigated and discussed the topic of covariates in our prior manuscript on time-varying adversity and childhood DNAm (6). These were selected based on their inclusion in prior studies of early-life exposures and DNAm using data from ALSPAC (6-9).

1. *Sex* – coded as a binary variable, as reported at birth, and confirmed from epigenetic data.
2. *Race/ethnicity* – coded as a binary variable corresponding to white or non-white, as our analytic sample was predominantly white and previous work in the ARIES subsample found no strong evidence of population stratification(6). Race/ethnicity was determined based on parent self-reports at birth; any response other than “White” from either parent resulted in the child received a code of “non-White”.
3. *Maternal age at birth* – coded as a categorical variable with three categories of response, ages 15-19, ages 20-35, and age 36+. We categorized this variable because maternal age does not have a linear relationship with health outcomes. Rather, children born to young (age <20) or older (age>35) mothers may be more likely to have deleterious health outcomes (10, 11). As such, using a continuous scale of maternal age is not appropriate for these types of analyses, in spite of the potential increase in power.
4. *Number of previous pregnancies* – coded as a categorical variable, with response categories of 1, 2, and 3+.

5. *Maternal smoking during pregnancy* – coded as an exposure if the mother smoked during at least two trimesters of pregnancy, as previously described (9).
6. *Child birthweight* – coded as a continuous variable.
7. *Maternal education* – coded as a categorical variable with four categories of response, less than O-level, O-level, A-level, and degree or above.
8. *Age at DNAm collection* – continuous measure of the age (in years) at which the blood sample for DNAm was collected from the participant.

We also estimated cell type composition using the Houseman method for all three ages as part of the *meffil* pipeline (4, 12). All estimated cell type proportions were included in downstream analyses and regressions that used DNAm data.

### Structured Life Course Modeling Approach (SLCMA)

We tested time-dependent associations for each adversity using the timepoints shown in **Fig. 1**. In the first step, the SLCMA selected the timepoint or additive hypothesis (accumulation; recency) that explained the most variation in a given CpG for each type of adversity (seven separate analyses of 302,581 CpGs). We interpreted the model selected by the SLCMA through six separate life course hypotheses, including four sensitive periods hypotheses that encoded exposure to each childhood adversity during:

1. *very early childhood* – hypothesis selected by the SLCMA fell within the ages of 0-3 (before 36 months);
2. *early childhood* – hypothesis selected by the SLCMA fell within the ages of 3-5 (69 months or before);
3. *middle childhood* – hypothesis selected by the SLCMA fell within the ages of 6-7 (84 months or before);
4. *late childhood* – hypothesis selected by the SLCMA fell within the ages of 8-11 (after 84 months);
5. *accumulation* – total number exposures across childhood, ranging from 0-8 total exposures, depending on the adversity analyzed;
6. *recency* – total number of exposures weighted by age when the adversity was measured.

In the second stage of the SCLMA, we used selective inference to perform post-selection inference(13) and adjusted for covariates using the Frisch-Waugh-Lovell theorem(14), shown to improve statistical power in penalized regression analyses(15, 16). Only complete cases (i.e., individuals with non-missing covariate and exposure data from ages 0-11) were analyzed for each adversity (**Fig. 1**).

### Biological implications of loci associated with childhood adversity identified from SLCMA

To further understand the biological implications of significant loci, we investigated the biological implications of findings from SLCMA in four different ways (**Table S5**).

First, we assessed the enrichment of regulatory elements in top loci compared to all analyzed loci using chi-squared tests. Both FDR-significant and  $R^2$ -threshold loci were overrepresented in enhancers (**FDR**:  $p=0.034$ ;  **$R^2$** :  $p=0.008$ ), but not gene promoters (**FDR**:  $p=0.17$ ;  **$R^2$** :  $p=0.17$ ; **Fig. S5A**). These loci were also enriched for regions away from CpG islands ('Open Sea'), rather than CpG Islands, shores, or shelves (**FDR**:  $p=0.021$ ;  **$R^2$** :  $p=0.018$ ; **Fig. S2B**). Overall, top loci showed higher representation in regions of lower CpG density, suggesting these genomic regions may be more responsive to childhood adversity.

Second, we examined the correlation of DNAm at the top loci in blood and four different brain regions using the Blood Brain DNA Methylation Comparison Tool(17). Most FDR-significant loci (17/22) had weak, but positive correlations between brain and blood (prefrontal cortex  $r_{avg}=0.05$ , range=-0.19-0.65; entorhinal cortex  $r_{avg}=0.06$ , range=-0.24-0.60; superior temporal gyrus  $r_{avg}=0.05$ , range=-0.18-0.61; cerebellum  $r_{avg}=0.06$ , range=-0.14-0.54)(**Table S6**; **Fig. S6**)(17). Similarly, most  $R^2$ -threshold loci (28/41) also had weak, but positive correlations, which were, on average, larger than those for the FDR loci (prefrontal cortex  $r_{avg}=0.11$ , range=-0.19-0.95; entorhinal cortex  $r_{avg}=0.11$ , range=-0.24-0.95; superior temporal gyrus  $r_{avg}=0.09$ , range=-0.21-0.94; cerebellum  $r_{avg}=0.09$ , range=-0.20-0.97). Thus, adversity-induced alterations to blood DNAm levels may reflect similar changes in the central nervous system.

Third, we analyzed the enrichment of biological processes in top loci using gene ontology (GO) terms from the DAVID tool (18, 19). Although none reached significance, eight distinct clusters of biological processes were overrepresented in FDR-significant loci ( $n=21$  genes)(18, 19). These clusters were implicated in abiotic stimulus, development, ion transport, and cellular regulation of biosynthetic processes (**Fig. S7**). By contrast, 18 clusters were identified for  $R^2$ -threshold loci, which were involved in development, MAPK activity, muscle development, and immunity. These results suggest that different types of childhood adversity may act through diverse biological processes, rather than a concerted network of pathways.

We also assessed the enrichment of GO terms in top loci using the *missMethyl* package in R, which accounts for the number of CpG measured in each gene(20). Again, no significant enrichment was detected for

KEGG pathways, biological processes, molecular functions, or cellular components at an  $FDR < 0.05$ . Among the top 10 processes from KEGG, biological processes, cellular component, and molecular function categories, several pathways and processes were related to immune function, apoptosis, and development (**Fig. S8**).

Fourth, we assessed the evolutionary constraint of genes linked to top loci using data from the Exome Aggregation Consortium (21), which estimated the probability of intolerance to loss-of-function (pLI) mutations using genetic and evolutionary data. In other words, genes with intolerance to loss-of-function are thought to have more functional constraint and thus, may potentially have played a role in human survival and evolution. Genes linked to top loci showed no evidence of enrichment for functionally-constrained genes (**Table S5; Fig. S9**). However, 3 FDR-significant genes linked to the accumulation of exposure to one-adult households showed evidence of strong evolutionary constraint ( $pLI > 0.9$ ; *DSP*, *CUX2*, and *STK38L*). Four additional genes with high evolutionary constraint were identified in the  $R^2$ -threshold loci (*FBXL16*, *PKD2*, *TAF1*, and *XKR6*). Five of the seven loci in genes with high functional constraint showed decreased DNAm in participants exposure to childhood adversity (*DSP*, *STK38L*, *FBXL16*, *PKD2*, *XKR6*). Together, these findings highlight a potential role for genes influenced by parental and social environment in human survival and evolution.

Finally, we used the EWAS catalog to identify traits previously associated with our top CpGs. All of our top 41 loci showed prior associations in the literature, including 29 that had been previously linked to age. We also found seven CpGs previously associated with gestational age, which had little effect on the strength of associations when we included it in our analysis of additional confounders (**Fig. S19**; see below for details). Similarly, six CpGs were linked to sex differences, though only the three located on chromosome X showed after removing sex as a covariate. One CpG was previously linked to smoking (cg02810291) and one to maternal BMI (cg13204236); additional confounding and mediation analyses for these CpGs again found no differences. Finally, we identified four CpGs previously associated with rheumatoid arthritis, which showed no mediation through CRP levels. However, these findings may point to further relationships between childhood adversity, inflammation, and future health outcomes.

### **Internal validation of age 15 loci using non-parametric bootstrapping**

The ALSPAC cohort is unique; no longitudinal birth cohorts at present have collected comparable measures of childhood adversity and DNAm. At best, other birth cohort studies with repeated measures of childhood adversity have only collected one timepoint of DNAm during childhood or adolescence, but not both. By contrast, studies with repeated DNAm measures do not have repeated and prospective measures of childhood adversity. As such, we could not complete external replication analyses of the associations we detected between time-varying childhood adversity and DNAm at age 15. In the absence of a cohort in which to replicate our findings, we performed internal validation analyses of our associations using ordinary nonparametric bootstrapping(22).

In brief, the bootstrap involves resampling data with replacement from a given sample(23). Unlike parametric methods, such as t-test and linear regressions, the bootstrap does not require assumptions of normality nor rely on parameter estimation (e.g., regression coefficients) from the original sample. Rather, the bootstrap relies on the approximations of test statistics, generated by drawing repeated resamples from a given sample – at random – across thousands of iterations. By resampling with replacement, the original sample size is maintained, with some rows of data omitted and others repeated; this process creates multiple random (re)samples of data from the same underlying population. Since the original sample is drawn from the population of interest, each bootstrap resample can be thought of as a new sample of data drawn from the population. In other words, the bootstrap sample differs from the original sample in each iteration at random, while also remaining similar to the general population from which the original sample was collected. As such, bootstrapping can provide insight into whether findings might be replicated in an independent cohort sampled from the same general population.

Here, we performed a random-x bootstrap resampling using the *boot* package in R(24). For each CpG identified in the analyses of childhood adversity and DNAm at age 15, we performed 10,000 bootstrapped linear regressions of the selected hypothesis (**Table 1**) and DNAm. We included the same covariates as the SLCMA analyses in the bootstrapped models. Effect estimates across the 10,000 bootstraps were averaged to obtain the “bootstrapped effect estimate”. 95% confidence intervals were calculated using the normal-theory interval(24). As we used the bootstrap for inference, rather than prediction, we did not estimate the bootstrap optimism. In inference, the optimism would be 0 and therefore, is not informative. Instead, we report the “bootstrap bias”, which is the difference between the bootstrapped estimate and the estimate in the full sample.

The results from the bootstrap analyses were nearly identical to those identified in the initial SLCMA analyses (**Table S7**), both in terms of average effect estimates and confidence intervals. The mean difference between effect estimates from the bootstrap and original analyses (i.e., bootstrap bias) across all top loci was  $4.57 \times 10^{-5}$  ( $2.52 \times 10^{-5}$  for FDR-significant loci), with the largest absolute magnitude of difference being 2.03%

(comparing the bootstrap to the original effect estimate). In addition, all effect estimates were significant at the 5% level, judged by bootstrap confidence intervals (**Fig. S10**). Confidence intervals were narrower in all but two of the original analyses (linear regression) compared to the bootstrap, suggesting the bootstrap could more precisely assess the effect estimate.

Together, these findings show that our initial results were robust to different analytic subsamples and populations, as well as nonparametric approaches that make fewer distributional assumptions. Thus, our findings may be likely to replicate in independent cohorts.

### **Adjusting for exposure to other childhood adversities**

To further determine the specificity of our associations between subtypes of childhood adversity and DNAm patterns at age 15, we performed a set of mutually-adjusted regression analyses. Specifically, we investigated the impact of correcting for exposure to the other six types of childhood adversity on the strength of association between a given measure of childhood adversity and DNAm.

Children in this analytic sample could have been exposed to adversity before, during, or after the sensitive periods we identified. We therefore coded exposure to other types of childhood adversity in five ways, as outlined below. We investigated these five different ways of coding co-occurring adversities to facilitate future replication of our work in datasets that may not be as fine-grained as ALSPAC, as well as narrow down the periods when co-occurring adversities may have the greatest impact on our results.

1. *Exposed to any other childhood adversity between age 1-11* – the full window of potential exposures to childhood adversity;
2. *Exposed to any other childhood adversity between age 1-7* – the window of potential exposures to childhood adversity that would influence age 7 and age 15 DNAm;
3. *Exposed to any other childhood adversity between age 8-11* – the window of potential exposures to childhood adversity that would only influence age 15 DNAm;
4. *Exposed to any other childhood adversity before the SLCMA-selected sensitive period;*
5. *Exposed to any other childhood adversity during the SLCMA-selected sensitive period;*

*NB: for loci with accumulation hypotheses – #4 and #5 were calculated using the accumulation of all exposures to other adversities from age 1-11.*

For each of the 41 adolescent-specific loci, we ran five separate regressions that included the base model (no mutual adjustment; i.e., the model we presented in primary text) and one of the five above variables. The strength of associations for the mutually-adjusted models were compared to the base model associations between the specific childhood adversity and DNAm at age 15. We found that all associations remained significant when correcting for other types of childhood adversity, no matter which mutual-adjustment strategy was employed (FDR<0.05 when correcting for testing 41 loci) (**Fig. S11**).

Associations between the accumulation of exposure to one-adult households and DNAm at age 15 were most attenuated in the mutually-adjusted model, showing between a 1 to 39% reduction in the size of the effect estimate per CpG; the average attenuation for these three CpGs was 9.0% (**Fig. S12**). Similarly, the three loci linked to the recency of exposures to financial hardship also showed stronger effect shifts in mutually adjusted models (range = -28% to 27%, mean = 2.4%). These results are perhaps unsurprising, given that accumulation and recency scores across childhood may be more highly correlated with other exposures to childhood adversity.

By contrast, we observed smaller alterations to the effect of exposures during sensitive period hypotheses when performing these mutual-adjustment analyses, suggesting our sensitive period findings were less prone to the influence of other types of childhood adversity. Of note, mutual-adjustment for other adversities reported during the same sensitive period identified by the SLCMA generally had the greatest effect on the strength of associations (**Fig. S12**). In particular, almost all associations between exposure to one adult households during early childhood, and DNAm at age 15 were attenuated when controlling for co-occurring adversities during the same sensitive period (mean = 8.6% reduction in effect estimate, range = -20.6% to 4.0%; **Fig. S13**). This finding suggests one-adult households may co-occur with other adversities more frequently, particularly during early childhood. Nevertheless, the strength of associations remained fairly stable even when controlling for these co-occurring exposures, indicating that associations remained specific to one-adult households.

Together, these results suggest our observed associations between childhood adversity and DNAm at age 15 were mostly specific to each type of childhood adversity and were not the result of other possible co-occurring exposures across childhood. Future studies should further investigate these findings in other cohorts to confirm their robustness and specificity to subtypes of childhood adversity, especially because ALSPAC is a sample where few children were simultaneously exposed to multiple types of adversity (see correlations in **Table S4** and **Fig. S4**).

## Replication cohort – The Raine Study

### *Sample description*

The Raine Study, formerly known as the Western Australian Pregnancy Cohort Study, is a continuing longitudinal study based in Perth, Western Australia. Between 1989-1991, 2,979 Generation 1 participants (primary caregivers) were recruited at approximately 18 weeks of pregnancy(25, 26). At birth, 2,868 participants were available for follow-up. Generation 2 participant (offspring) follow-ups were conducted at 34 weeks' gestation, and ages 1, 2, 3, 5, 8, 10, 13, 17, 20, 22, and 27 years; and labelled to reflect average age of participants at each follow-up. Follow-ups were approved by Human Ethics Committee at King Edward Memorial Hospital, Princess Margaret Hospital for Children, and the University of Western Australia in Perth. Generation 2 participants with epigenetic data were included in the present analysis (n=1,190). Local Flinders ethics was ratified by their Human Research Ethics Committee approval number: HEL4641-2.

### *DNA methylation profiling*

Primary caregivers (Gen1) provided written informed consent to participate in the study at each follow-up and participants (Gen2) provided consent when they were old enough. Clinical assessments were performed at multiple follow-ups, including at age 17 years where a blood sample was taken with consent. DNA methylation profiles were generated from whole blood for 1,192 (58 technical replicates) participants. DNA was first extracted from the blood sample via the Puregene DNA Isolation kit (Qiagen, Germany). Genomic DNA was treated with sodium bisulphite with the Zymo EZ DNA Methylation-Gold kit. Processing of the Human Methylation 450K array was performed by the Centre for Molecular Medicine and Therapeutics (The University of British Columbia, Vancouver, Canada).

Quality control was performed via R and Bioconductor packages *shinyMethyl*, *MethylAid*, and *RnBeads*. Four participants were identified as outliers and removed; three additional participants with poor probe quality were also removed, as was one participant with a sex misclassification. CpG sites were removed for the following reasons: CpG with a common SNP disrupted the site leading to genotypic specific DNAm levels; sex chromosome CpGs; CpGs with a detection  $p > 0.05$  in any sample; probes with bead counts  $< 3$  in more than 5% of samples. Normalization was performed using beta-mixture quantile normalization (BMIQ) (27).

### *Childhood adversity (one-adult households)*

Gen2 participants were followed-up at 34 weeks' gestation, and ages 1, 2, 3, 5, 8, 10, 13, 17, 20, 22, and 27 years. A variety of clinical and demographic information was collected from Gen1 and Gen2 participants at each follow up. Using these data, we could harmonize one type of time-varying childhood adversity between ALSPAC and the Raine Study cohorts: exposure to one-adult household.

Specifically, information on number of adults (i.e., those aged 18 or older) that the income supported in the Gen2 participant household was collected as a continuous numeric value at ages 1, 2, 3, 5, 8, 10. Data were recoded to reflect a binary in terms of a one-adult household (exposed/unexposed) at each period.

### *Covariates*

The following covariates were included in the analyses of data from the Raine Study:

1. Biological sex assigned at birth
2. First 10 principal components of genetic variance (calculated using SNP data)
3. Maternal education level at birth
4. Maternal age at birth
5. Mother's number of previous pregnancies
6. Child birthweight
7. Maternal smoking during pregnancy
8. Cell type proportions estimated using the Houseman method.

## Replication cohort – Future of Families and Child Wellbeing Study (FFCWS)

### *Sample description*

FFCWS is a prospective, longitudinal birth cohort of almost 5,000 families in the USA followed to capture a representative sample of families vulnerable to risk factors linked to nonmarital childbearing(28). From 1998 to 2000, 4,898 children in 75 hospitals were enrolled in the study (76% unmarried parents). FFCWS is an ethnically/racially diverse sample (50% Black; 24% Hispanic; 18% White) enriched for families with fewer socioeconomic resources (65% with  $\leq$  high-school degree; 39% below poverty line at birth). Families were interviewed when children were 1, 3, 5, 9, and 15 years old. Follow-up completion rates are  $>75\%$  at all ages.



### *DNA methylation profiling*

DNAm was measured from children's saliva samples at age 15 (N=2,020). DNA was collected using the DNA Genotek Oragene kits and purified according to the manufacturer's protocol. DNA was then bisulphite converted using the EZ-96 DNA kit (Zymo Research) and methylation was assessed using the Illumina 450 K array (n=880). A secondary sample was analysed using the Illumina EPIC array (n=1,140).

DNA methylation data were initially processed with the *minfi* R package(29). Stratified quantile normalization was undertaken to remove bad samples. Probes on sex chromosomes, problems with a SNP within nucleotide of the CpG site, probes with >20% failed samples, and CpG sites with >50% failed samples were removed.

### *Childhood adversity*

We investigated four measures of childhood adversity in the FFCWS cohort, which are outlined below. For all adversities, we analyzed the presence/absence of the exposure during the specific timepoint closest to ALSPAC.

1. Caregiver physical and emotional abuse (N<sub>DNAm</sub>=662-1,527): The Conflict Tactics Scale was collected from mothers, fathers, and primary caregivers (if not mother or father) at ages 3, 5, and 9. Participants were classified as having been exposed to caregiver physical or emotional abuse exposed if they experienced (1) physical punishment on two or more occasions (e.g., spanking, hitting, slapping) OR (2) verbal aggression on three or more occasions (e.g., shouting/yelling, calling them names/dumb/lazy, threatened to hit, etc.).
2. Maternal psychopathology (N<sub>DNAm</sub>=1,846): Maternal depression was measured at ages 1, 3, 5, and 9 using the CIDI-SF scale for depression(30-33). Participants were classified as exposed if mothers met a liberal threshold score of  $\geq 3$  in the CIDI-SF.
3. One adult in the household (N<sub>DNAm</sub>=799-1842): At ages 1, 3, 5, and 9, primary caregivers reported the number of individuals aged 18+ living in the household. Participants were classified as exposed if only one adult lived in the household.
4. Financial hardship (N<sub>DNAm</sub>=722-1,859): Mothers reported material hardship at ages 1, 3, 5, and 9 (34-37) . Participants were coded as exposed to financial hardship if mothers reported difficulties paying for the following three items in the past year: (1) food (2) rent, and (3) utilities.

### *Covariates*

The following covariates were included in replication analyses using FFCWS data:

1. child sex
2. child birthweight
3. mother's number of prior pregnancies
4. maternal education
5. maternal age at birth
6. maternal smoking during pregnancy
7. city of data collection
8. array type (450K or EPIC)
9. leukocyte proportion estimated using a childhood saliva reference panel(38).

### **Replication analyses**

#### *Winner's curse correction of top ALSPAC loci*

Winner's curse is the terms evoked in genome-wide studies to explain why top associations identified from discovery analyses may fail to replicate when tested again in independent data sets(39). In other words, the first identification of a given exposure-outcome relationship may be an exaggerated estimate for a given exposure-outcome relationship in the sample in which it was first identified.

To reduce concerns that our discovery results were biased by Winner's curse, we accounted for Winner's curse when attempting to replicate our findings in the Raine Study and the FFCWS. We used the *winnercurse* package in R ([github.com/amandaforde/winnercurse](https://github.com/amandaforde/winnercurse)), which performs a normalized maximum likelihood estimation (MLE) on our top 41 loci, leveraging the effect estimates and standard errors of these loci to calculate a bias-corrected estimate and 95% confidence intervals(40). As expected, relative to our original discovery results, we found the Winner's curse corrected estimates were smaller and had wider confidence intervals, but remained significantly associated with exposure to childhood adversity (**Table S8**). We use these estimates in downstream replication analyses to assess potential replication more reliably in the Raine Study and FFCWS.

### *Replication in the Raine Study Generation 2*

We focused our replication analyses on the CpGs identified in the primary analyses. Due to the availability of childhood adversity data, we could only investigate the 20 CpGs associated with one-adult households (**Table S8; Fig. S14**). In other words, we could not adequately match the other types of childhood adversity measured in the ALSPAC cohort using data from the Raine Study. We also note that participants from the Raine Study had blood DNAm profiles measured later in development (starting at age 17), meaning that differences in DNAm present earlier in development (i.e., age 15) may have resolved by this timepoint.

As we have previously shown, p-values are an unstable metric for the replication of time-varying associations within and between studies(7). Thus, we focused primarily on replicating the direction and magnitude of associations observed using ALSPAC data.

In the Raine Study (N=382-529), we performed linear regressions of exposures to one-adult households, matched as closely as possible to the time point identified in ALSPAC (**Table S8**) and DNAm measured at age 17, adjusting for covariates. Across all CpGs, the magnitude of effects between adversity and DNAm were smaller in Raine than ALSPAC, even with our Winner's curse bias-corrected estimates (**Fig. S15**). However, 90% of CpGs (18/20) showed the same direction of associations, which is higher than would have been expected under the null ( $p=0.000201$ ) (**Fig. S15**). Three CpGs showed nominal associations in the Raine Study ( $p<0.05$ ), though none passed multiple-test correction. However, their 95% confidence intervals did not overlap with zero; their confidence intervals also overlapped with the winner's curse-correction estimates from the ALSPAC cohort. Prior studies have used both criteria as a metric for replication(41).

Together, these that the associations between one-adult household and DNAm identified in the ALSPAC cohort are partially recapitulated in the Raine Study. Although the replicated effects were smaller in the Raine Study, key differences in the socioeconomic context and age at DNAm measurement could have influenced these findings. These findings further highlight the importance of investigating sensitive periods for childhood adversity and DNAm across sociobiological contexts and across time.

### *Replication in the FFCWS cohort*

We focused our replication analyses on the CpGs identified in the primary analyses, again attempting to replicate the direction and magnitude of associations. Due to the availability of childhood adversity and DNAm data, we could only investigate 28 CpGs associated with caregiver abuse (3 CpGs), maternal psychopathology (1 CpG), one-adult households (15 CpGs), and financial hardship (9 CpGs) (**Table S9; Fig. S14**). Of these loci, five were only measured on the 450K array (not the EPIC array), resulting in a smaller sample size.

We could not adequately match the other types of childhood adversity measured in the ALSPAC cohort (neighborhood disadvantage and physical/sexual abuse) using data from FFCWS, and the loci associated with family instability were not available for analysis. We also note that all participants from FFCWS had DNAm profiles measured from saliva, with a subset having data generated from the EPIC array (N=865-1,043). FFCWS is also demographically distinct from the ALSPAC cohort, having higher prevalence of socioeconomic adversity and more racial/ethnic diversity. These differences may have influenced our ability to replicate associations in FFCWS.

In FFCWS (N=662-1,859), we performed linear regressions of exposures to childhood adversity, matched as closely as possible to the time point identified in ALSPAC (**Table S9**) and DNAm measured from saliva at age 15, adjusting for covariates. Across all CpGs, the magnitude of effects between adversity and DNAm were smaller in FFCWS than ALSPAC, even with our Winner's curse bias-corrected estimates (**Fig. S16**). However, 64% of CpGs (18/28) showed the same direction of associations, which is slightly higher than would have been expected under the null ( $p=0.092$ )(**Fig. S16**). We also note that 73% of the CpGs associated with one-adult households (11/15) showed the same direction of effects between cohorts, again slightly higher than random chance ( $p=0.059$ ). Importantly, all 11 of these one-adult household CpGs showed the same direction of effects in the Raine Study, which further point to the replication of one-adult household effects across cohorts. In addition, one CpG associated with the accumulation of one-adult household exposures (cg00807464) showed nearly identical effect estimate between cohorts. Although no loci met a nominal  $p<0.05$  threshold, several CpGs had confidence intervals that overlapped with those in ALSPAC.

Overall, the directions of associations between childhood adversity and DNAm were largely replicated in the FFCWS cohort, particularly for exposures to one-adult households. Given the clear differences between FFCWS and ALSPAC, it is perhaps unsurprising that the magnitude of associations was smaller in replication analyses. Further studies using large-scale, longitudinal birth cohorts are needed to triangulate these results across cohorts and determine the extent to which differences in the sociodemographic environment might influence the relationship between childhood adversity and adolescent DNAm.

## Testing for potential confounding effects of the relationship between childhood adversity and DNA methylation levels at age 7 and 15

Given that our observed associations between childhood adversity and DNAm at age 15 were not present at age 7, we hypothesized that these emergent effects could be influenced by confounding structures of the data, whereby other factors might be driving these adolescent-specific associations. As such, we further investigated whether the associations we observed between time-varying childhood adversity and DNA methylation patterns across development were influenced by confounding factors or methodological artifacts that were not included in our models. We approached the issue of confounders using two approaches, outlined in **Fig. S2** and **Fig. S18**, focusing on the 41 associations that were identified in age 15 DNAm.

### *Early-life confounders of childhood adversity and DNAm at age 7 and 15*

First, we tested whether early-life factors could influence the strength of associations between childhood adversity and DNAm levels at age 7 and 15. To this end, we assessed the impact of removing covariates from our base model (described above) on the estimated effect from a linear regression of time-varying adversity and DNAm levels. When removing individual covariates from the base model, we did not observe any large changes in the effect estimates of the associations between childhood adversity and DNAm at age 15 (**Fig. S19**) or age 7 (**Fig. S20**), except for two CpGs (cg17928317: 37.5% increase; cg27558057: 72.8% decrease). The effect estimates of these two loci changed substantially upon removal of sex as a covariate (**cg17928317**: age 15  $\beta_{\text{base}}=0.079$ ,  $\beta_{\text{no sex}}=0.108$ ; age 7  $\beta_{\text{base}}=0.001$ ,  $\beta_{\text{no sex}}=0.029$ ; **cg27558057**: age 15  $\beta_{\text{base}}=0.106$ ,  $\beta_{\text{no sex}}=0.029$ ; age 7  $\beta_{\text{base}}=0.066$ ,  $\beta_{\text{no sex}}=-0.024$ ), though we note that both CpGs are located on chromosome X. As such, some amount of sex-dependent variability is expected due to differences in X chromosome dosage between males and females.

Beyond the covariates included in our base model, we also investigated whether other common confounders may have influenced our observed associations. Here, we assessed the impact of adding the following confounding factors known to influence childhood adversity or DNAm patterns to our base regression model: 1) parental socio-economic position (parent SEP) measured at birth, 2) gestational age in weeks, 3) maternal pre-pregnancy BMI, and 4) delivery type (caesarean or non-caesarean birth). We investigated these potential confounding factors due to their influence on risk for childhood adversity, as well as their prior associations with longitudinal DNAm patterns (42, 43). Of note, these factors were omitted from our initial analyses due to their high correlation with other covariates within our base model that are more robust predictors of longitudinal outcomes, such as maternal education, birthweight, maternal age, etc.

In general, the inclusion of parent SEP, gestational age, or maternal BMI did not substantially influence the strength of associations between childhood adversity and DNAm levels at age 15 (**Fig. S19**) or age 7 (**Fig. S20**). Indeed, only four loci showed a >10% change in their effect estimates upon the inclusion of these new covariates, all of which were influenced by the inclusion of maternal pre-pregnancy BMI (two from one-adult households and FDR-significant; two from financial hardship and passing the  $R^2$ -threshold). All associations remained significant at a Bonferroni-adjusted  $p < 0.05$  (for 41 loci). Changes less than 10% are generally thought to reflect factors that have little confounding effects (44), although more recent studies suggest that this threshold may be overly conservative and that thresholds for confounding could reach up to 40% (45).

By contrast, we observed more variance in the effect estimates and p-values when including delivery method as a covariate. Indeed, 22 of 41 loci showed >10% change in effect estimates in age 15 DNAm, of which nine were no longer significant at a Bonferroni-adjusted  $p < 0.05$  (for 41 loci). Only one locus had >40% change in the effect, which was associated with financial hardship during late childhood (cg04659536; effect change = -83.3%). These findings are reflective of potential residual confounding from the method of delivery for a subset of loci at age 15. However, we note that including this covariate substantially reduced our sample size due to higher missingness than other variables, which could potentially introduce issues of selection bias. Associations in age 7 DNAm showed little to no impact of caesarean births on effect estimates.

Taken together, these findings suggest the specific associations between time-varying childhood adversity and DNAm at age 15 may not be due to the effects of common confounders or methodological artifacts arising from our current covariates. Furthermore, the associations between adversity and DNAm at age 7 remained null for all but one of these 41 loci ( $p > 0.0012$ ), further suggesting that the latent effects we observed were unlikely due to common confounders. Nevertheless, it is possible that other unmeasured confounders may influence the relationship between childhood adversity and DNAm at age 15, and thus, our findings should be replicated in other longitudinal birth cohorts with repeated measures of childhood adversity and DNAm.

### *Adolescent-specific factors mediating the relationship between childhood adversity and DNAm*

Second, we tested the influence of adolescent-specific factors that could have possibly explained our observed associations. These adolescent-specific factors occurred after childhood adversity and DNAm collection at age 7, but before DNAm collection at age 15 (**Fig. S18**). Because our associations maintained the temporal ordering of exposures preceding the outcome, adolescent-specific confounders should not influence associations with DNAm at age 7. Moreover, confounders are, by definition, linked to both the exposure (adversity) and outcome (DNAm levels at age 15). In the present situation, we could assume that adolescent-specific factors land in the causal path between adversity and DNAm, given that they would occur after adversity and before DNAm. Given this causal path, potential adolescent-specific confounders could be considered mediators, rather than confounders that can be adjusted in a regression model. As such, we performed causal mediation analyses using the R package *mediation* (version 4.5.0) to determine whether our adolescent-specific association were explained, in part, by potential factors on the causal path. To this end, we assessed whether four biological outcomes previously linked to childhood adversity and/or DNAm patterns significantly mediated our observed associations; our rationale for testing these variables is described below. We corrected for the same covariates as previously described in mediation analyses.

**Pubertal onset:** Exposure to childhood adversity has been associated with earlier pubertal onset in some studies, including ALSPAC (46). Puberty is a time of rapid change and development, with concomitant alterations in epigenetic pathways (47). As such, age at pubertal onset is a plausible candidate to mediate the association between childhood adversity and DNAm levels in adolescence. To estimate pubertal timing, we analyzed the age at peak height velocity, calculated by a method called superimposition by translation and rotation (SITAR), which analyzes height measurements between age 5 and 16 (N=605-654) to identify the age at pubertal onset(48).

We did not identify significant mediation effects for pubertal onset for any of our top 41 loci (lowest p-value = 0.268, cg14455319; **Fig. S21**). Furthermore, when we contrasted our findings to a previous epigenome-wide association study of puberty and gonadal hormone levels, we did not find any overlaps with our 41 adolescent-specific loci(49). These findings suggest pubertal onset was unlikely to explain adolescent-specific associations.

**Body mass index (BMI):** We next analyzed BMI measured at age 15 (N=569-618). Prior studies have shown that childhood adversity is linked to obesity and changes in metabolic function(50, 51). In addition, a recent study of BMI in the ARIES cohort has shown a strong relationship between DNAm and BMI(52). Although the majority of loci in our analysis showed no significant mediation through BMI at age 15 (**Fig. S22**), 2.67% of the association between exposure to a one adult household in early childhood and DNAm levels at cg16907527 was explained by BMI (p=0.050). Although this association did not survive multiple-test correction, we note this locus is located in *VEGFA*, a gene linked to hyperglycemia and diabetes(53). Together, these finding suggest BMI was not likely to have substantial confounding effects on our findings.

**C-reactive protein (CRP):** Childhood adversity has been associated with alterations in inflammatory pathways (54), which, in turn, have been linked to genome-wide DNAm differences (55, 56). As such, we assessed the potential role of CRP levels, measured at age 15, as a mediator between childhood adversity and DNAm levels at age 15 (N=491-542). Again, we did not identify any significant mediation effects (**Fig. S23**). Two loci, located in *VEGFA* (cg16907527) and *SLC25A41* (cg12096528), showed a causal mediation effect with p<0.05, suggesting that CRP levels may have slight effects on our associations. Again, these did not survive multiple-test correction for the analysis of 41 loci. Overall, these findings suggest that CRP may not have been an important confounding factor in our analyses.

**Adolescent smoking:** Smoking and exposure to cigarette smoke is one of the strongest and best-replicated associations with DNAm patterns(57). In addition, smoking in early adolescence may reflect increased risk-taking behaviors, which are linked to a higher likelihood of exposure to some types of childhood adversity(58). As such, we investigated daily smoking at age 15 (meaning whether the adolescent smoked every day or not) explained the relationship between childhood adversity and DNAm levels at age 15 (N=566-613). At age 15, adolescents were asked if they smoked every day during their clinic visit, reported as yes/no (adolescents who reported “not applicable” were coded as “no”). In the subsets of adolescents with childhood adversity, DNAm, and covariates, the prevalence of smoking at age 15 ranged from 3.9 to 4.3% (mean = 4.0%) across the adversities analyzed (prevalence varied due to the varying completeness of each type of adversity). Again, we did not observe any significant mediation effects of smoking on the association between childhood adversity and DNAm at age 15 (**Fig. S24**), suggesting that smoking may not have confounded our findings.

All taken together, these results suggest that our findings were not influenced by these four biological and environmental factors linked to childhood adversity and known to influence DNAm levels. Although we cannot rule out that other pathways may be involved in our adolescent-specific associations, these analyses provide additional support for the direct and latent effects of childhood adversity on the adolescent epigenome.

### Types of DNAm trajectories across development for age 15 loci

To further refine the patterns of change and stability in DNAm responses to childhood adversity, we identified the different types of longitudinal DNAm trajectories present in the 41  $R^2$ -threshold loci identified from the SCLMA of age 15 DNAm. We first performed a two-way mixed analysis of variance (ANOVA) of the statistical interaction between age at DNAm collection and exposure group, controlling for the timing of repeated measures of DNAm (i.e., age 0, 7, 15) of each individual as fixed effects. Based on this ANOVA, we split trajectory types based on the statistical significance of exposure group-by-age interactions, finding two sets of loci: 1) 7 loci that did not show any group-by-age interactions (i.e., stable cluster) and 2) 34 loci with significant group-by-age interactions (FDR<0.05).

Focusing on the second subset, we characterized the patterns of DNAm that could be used to distinguish between different types of DNAm trajectories across development. To this end, we applied a Tukey *post-hoc* test to identify the significant contrasts from the ANOVA of exposure group-by-age interactions for each locus, which included exposure group differences, mean age differences, and exposure group differences *within* and *between* each age. As we were interested in changes across time and age 15-specific patterns, we focused our analyses on a subset of these Tukey contrasts, which included:

1. *mean exposure group differences across all age* – meaning comparisons between individuals exposed during the period selected by the SCLMA (exposed-SP), individuals exposed outside the period selected by the SCLMA (exposed-other), and individuals with no exposure (unexposed);
  - a. Exposed-SP versus Exposed-other
  - b. Exposed-SP versus Unexposed
  - c. Exposed-other versus Unexposed
2. *mean age differences across exposure groups for neighboring ages* – meaning mean differences between age 7 and 0, as well as mean differences between age 15 and 7;
  - a. Age 7 versus Age 0
  - b. Age 15 versus Age 7
3. *exposure group differences within each age* – meaning differences between exposure groups at age 0, age 7, or age 15.
  - a. Age 0-specific differences
    - i. Exposed-SP versus Exposed-other
    - ii. Exposed-SP versus Unexposed
    - iii. Exposed-other versus Unexposed
  - b. Age 7-specific differences
    - i. Exposed-SP versus Exposed-other
    - ii. Exposed-SP versus Unexposed
    - iii. Exposed-other versus Unexposed
  - c. Age 15-specific differences
    - i. Exposed-SP versus Exposed-other
    - ii. Exposed-SP versus Unexposed
    - iii. Exposed-other versus Unexposed

We recoded these contrasts as categorical variables to reflect whether the differences from the Tukey were significant (0 =  $p > 0.05$ ; 1 =  $p < 0.05$ ). We then performed divisive hierarchical clustering using a dissimilarity matrix for these categorical patterns (i.e., 0/1 based on significance) using the *cluster* package in R (59). We selected the number of distinct types of trajectories based on the inflection point of the sum of squares (lowest without meaningful decrease), with no more than one trajectory type with one CpG (**Fig. S25**). This step resulted in six distinct types of DNAm trajectories (**Fig. S26**), which showed distinct profiles of age, group, and group-by-age differences (7). Trajectories were plotted using cell-type corrected DNAm values and complete cases for covariates measured at birth (age 0: N = 559-616; age 7: N = 613-668; age 15: N = 609-665; sample sizes varied by adversity; **Fig. S28**).

For the seven loci without exposure group-by-age interactions, we identified slight differences between youths exposed during a sensitive period and those who were unexposed at age 7, which fully emerged by age 15 (i.e., stable).

Finally, we did not identify any differences in the enrichment of DNAm trajectories between loci in the FDR-significant and  $R^2$ -threshold subsets ( $\chi^2=1.92$ ,  $p=0.86$ ; **Fig. S29**). These findings further emphasize that p-values do not show the whole picture, though additional differences may emerge when thresholds are relaxed further.

## Investigating adversity-DNA relationships within a threat and deprivation paradigm

To investigate potential differences between in sensitive period enrichment among our top loci in the context of threat versus deprivation-type exposures(60-62), we used the following definitions to classify our adversities into this established paradigm:

- A. *Threat*: Threat exposures are defined as “experiences that represent a threat to one’s physical integrity”(60). Based on this definition, exposures to 1) caregiver physical or emotional abuse, and/or 2) physical or sexual abuse (by anyone) were categorized as threat-type exposures.
- B. *Deprivation*: Deprivation exposures are defined as the “absence of expected environmental inputs and complexity”(60). Based on this definition, exposures to 1) family instability, 2) financial hardship, 3) maternal psychopathology, 4) neighborhood disadvantage, and/or 5) one-adult households were categorized as deprivation-type exposures.

Following the classification of adversities into these paradigms, we investigated differential patterns of sensitive period enrichment for the 41 top loci identified at age 15 and 22 loci that passed an FDR<0.05 threshold (**Fig. S30**). Although there were differences in the number of adversities contributing to these two exposure paradigms, we observed more loci associated with a deprivation paradigm (34 loci) than a threat paradigm (7 loci). Furthermore, both exposure paradigms had more associations with exposure during early childhood than other exposure periods or models. However, loci associated with threat exposures were clustered mainly within early childhood, while loci associated with deprivation exposures were more distributed across time periods ( $p=0.32$ ). Together, these findings suggest that deprivation-type exposures during early childhood may have greater impacts on adolescent DNAm profiles, but these effects can be further refined by investigating specific types of childhood adversity.

## References

1. Fraser A, Macdonald-Wallis C, Tilling K, Boyd A, Golding J, Davey Smith G, et al. Cohort Profile: the Avon Longitudinal Study of Parents and Children: ALSPAC mothers cohort. *Int J Epidemiol.* 2013;42(1):97-110.
2. Boyd A, Golding J, Macleod J, Lawlor DA, Fraser A, Henderson J, et al. Cohort Profile: the 'children of the 90s'--the index offspring of the Avon Longitudinal Study of Parents and Children. *International journal of epidemiology.* 2013;42(1):111-27.
3. Relton CL, Gaunt T, McArdle W, Ho K, Duggirala A, Shihab H, et al. Data Resource Profile: Accessible Resource for Integrated Epigenomic Studies (ARIES). *Int J Epidemiol.* 2015;44(4):1181-90.
4. Min JL, Hemani G, Davey Smith G, Relton C, Suderman M. Meffil: efficient normalization and analysis of very large DNA methylation datasets. *Bioinformatics (Oxford, England).* 2018;34(23):3983-9.
5. Tukey JW. The Future of Data Analysis. *The Annals of Mathematical Statistics.* 1962;33(1):1-67.
6. Dunn EC, Soare TW, Zhu Y, Simpkin AJ, Suderman MJ, Klengel T, et al. Sensitive periods for the effect of childhood adversity on DNA methylation: results from a prospective, longitudinal study. *Biological Psychiatry.* 2019;85(10):838-49.
7. Lussier AA, Zhu Y, Smith BJ, Simpkin AJ, Smith ADAC, Suderman MJ, et al. Updates to data versions and analytic methods influence the reproducibility of results from epigenome-wide association studies. *Epigenetics.* 2022.
8. Liu J, Cerutti J, Lussier AA, Zhu Y, Smith BJ, Smith ADAC, et al. Socioeconomic changes predict genome-wide DNA methylation in childhood. *Human Molecular Genetics.* 2022.
9. Richmond RC, Simpkin AJ, Woodward G, Gaunt TR, Lyttleton O, McArdle WL, et al. Prenatal exposure to maternal smoking and offspring DNA methylation across the lifecourse: findings from the Avon Longitudinal Study of Parents and Children (ALSPAC). *Hum Mol Genet.* 2015;24(8):2201-17.
10. Myrskylä M, Fenelon A. Maternal age and offspring adult health: evidence from the health and retirement study. *Demography.* 2012;49(4):1231-57.
11. Fall CHD, Sachdev HS, Osmond C, Restrepo-Mendez MC, Victora C, Martorell R, et al. Association between maternal age at childbirth and child and adult outcomes in the offspring: a prospective study in five low-income and middle-income countries (COHORTS collaboration). *The Lancet Global Health.* 2015;3(7):e366-e77.
12. Houseman EA, Molitor J, Marsit CJ. Reference-free cell mixture adjustments in analysis of DNA methylation data. *Bioinformatics.* 2014;30.
13. Tibshirani RJ, Taylor J, Lockhart R, Tibshirani R. Exact Post-Selection Inference for Sequential Regression Procedures. *Journal of the American Statistical Association.* 2016;111(514):600-20.
14. Frisch R, Waugh VF. Partial Time Regressions as Compared with Individual Trends. *Econometrica.* 1933.

15. Yamada H. The Frisch–Waugh–Lovell theorem for the lasso and the ridge regression. *Communications in Statistics - Theory and Methods*. 2017;46(21):10897-902.
16. Zhu Y, Simpkin AJ, Suderman MJ, Lussier AA, Walton E, Dunn EC, et al. A Structured Approach to Evaluating Life Course Hypotheses: Moving Beyond Analyses of Exposed Versus Unexposed in the Omics Context. *Am J Epidemiol*. 2020.
17. Hannon E, Lunnon K, Schalkwyk L, Mill J. Interindividual methylomic variation across blood, cortex, and cerebellum: implications for epigenetic studies of neurological and neuropsychiatric phenotypes. *Epigenetics*. 2015;10(11):1024-32.
18. Huang da W, Sherman BT, Lempicki RA. Systematic and integrative analysis of large gene lists using DAVID bioinformatics resources. *Nat Protoc*. 2009;4(1):44-57.
19. Huang da W, Sherman BT, Lempicki RA. Bioinformatics enrichment tools: paths toward the comprehensive functional analysis of large gene lists. *Nucleic Acids Res*. 2009;37(1):1-13.
20. Phipson B, Maksimovic J, Oshlack A. missMethyl: an R package for analyzing data from Illumina's HumanMethylation450 platform. *Bioinformatics*. 2016;32(2):286-8.
21. Lek M, Karczewski KJ, Minikel EV, Samocha KE, Banks E, Fennell T, et al. Analysis of protein-coding genetic variation in 60,706 humans. *Nature*. 2016;536(7616):285-91.
22. Davison AC, Hinkley DV. *Bootstrap Methods and Their Applications*. Cambridge: Cambridge University Press; 1997.
23. Howell DC. *Statistical methods for psychology*: Cengage Learning; 2012.
24. Cauty A, Ripley B. boot: Bootstrap R (S-Plus) Functions. R package version. 2021;1:3-18.
25. Newnham JP, Evans SF, Michael CA, Stanley FJ, Landau LI. Effects of frequent ultrasound during pregnancy: a randomised controlled trial. *Lancet*. 1993;342(8876):887-91.
26. McKnight CM, Newnham JP, Stanley FJ, Mountain JA, Landau LI, Beilin LJ, et al. Birth of a cohort--the first 20 years of the Raine study. *Med J Aust*. 2012;197(11):608-10.
27. Teschendorff AE, Marabita F, Lechner M, Bartlett T, Tegner J, Gomez-Cabrero D, et al. A beta-mixture quantile normalization method for correcting probe design bias in Illumina Infinium 450 k DNA methylation data. *Bioinformatics*. 2013;29(2):189-96.
28. Reichman NE, Teitler JO, Garfinkel I, McLanahan SS. Fragile families: sample and design. *Children and Youth Services Review*. 2001;23(4/5):303-26.
29. Aryee MJ, Jaffe AE, Corrada-Bravo H, Ladd-Acosta C, Feinberg AP, Hansen KD, et al. Minfi: a flexible and comprehensive Bioconductor package for the analysis of Infinium DNA methylation microarrays. *Bioinformatics*. Department of Pathology, Massachusetts General Hospital and Harvard Medical School, Boston, MA 02114, USA, Department of Biostatistics, Johns Hopkins School of Public Health, 615 N Wolfe Street, Baltimore, MD 21205, USA, Lieber Institute of Brain Developm: Oxford University Press; 2014. p. 1363-9.
30. Patten SB. Performance of the Composite International Diagnostic Interview Short Form for major depression in community and clinical samples. *Chronic Dis Can*. 1997;18(3):109-12.
31. Kessler RC, Andrews G, Mroczek D, Ustun B, Wittchen H-U. The World Health Organization Composite International Diagnostic Interview short-form (CIDI-SF). *International Journal of Methods in Psychiatric Research*. 1998;7(4):171-85.
32. McGovern ME, Rokicki S, Reichman NE. Maternal depression and economic well-being: A quasi-experimental approach. *Social Science & Medicine*. 2022;305:115017.
33. Turney K. Prevalence and correlates of stability and change in maternal depression: evidence from the Fragile Families And Child Wellbeing Study. *PLoS One*. 2012;7(9):e45709.
34. Mayer SE, Jencks C. Poverty and the Distribution of Material Hardship. *The Journal of Human Resources*. 1989;24(1):88-114.
35. Thomas MMC. Longitudinal Patterns of Material Hardship Among US Families. *Social Indicators Research*. 2022.
36. Zhang X, Zhang Y, Vasilenko SA. The longitudinal relationships among poverty, material hardship, and maternal depression in the USA: a latent growth mediation model. *Arch Womens Ment Health*. 2022.
37. Thomas MMC, Waldfogel J. What kind of "poverty" predicts CPS contact: Income, material hardship, and differences among racialized groups. *Children and youth services review*. 2022;136:106400.
38. Middleton LYM, Dou J, Fisher J, Heiss JA, Nguyen VK, Just AC, et al. Saliva cell type DNA methylation reference panel for epidemiological studies in children. *Epigenetics*. 2022;17(2):161-77.
39. Zhong H, Prentice RL. Correcting "winner's curse" in odds ratios from genomewide association findings for major complex human diseases. *Genet Epidemiol*. 2010;34(1):78-91.

40. Ghosh A, Zou F, Wright FA. Estimating odds ratios in genome scans: an approximate conditional likelihood approach. *Am J Hum Genet.* 2008;82(5):1064-74.
41. Cronjé HT, Elliott HR, Nienaber-Rousseau C, Pieters M. Replication and expansion of epigenome-wide association literature in a black South African population. *Clinical epigenetics.* 2020;12(1):6.
42. Simpkin AJ, Suderman M, Gaunt TR, Lyttleton O, McArdle WL, Ring SM, et al. Longitudinal analysis of DNA methylation associated with birth weight and gestational age. *Hum Mol Genet.* 2015;24(13):3752-63.
43. Sharp GC, Lawlor DA, Richmond RC, Fraser A, Simpkin A, Suderman M, et al. Maternal pre-pregnancy BMI and gestational weight gain, offspring DNA methylation and later offspring adiposity: findings from the Avon Longitudinal Study of Parents and Children. *Int J Epidemiol.* 2015;44(4):1288-304.
44. Budtz-Jørgensen E, Keiding N, Grandjean P, Weihe P. Confounder selection in environmental epidemiology: assessment of health effects of prenatal mercury exposure. *Ann Epidemiol.* 2007;17(1):27-35.
45. Lee PH. Is a cutoff of 10% appropriate for the change-in-estimate criterion of confounder identification? *J Epidemiol.* 2014;24(2):161-7.
46. Russell AE, Joinson C, Roberts E, Heron J, Ford T, Gunnell D, et al. Childhood adversity, pubertal timing and self-harm: a longitudinal cohort study. *Psychol Med.* 2021:1-9.
47. Lussier AA, Islam SA. Epigenetics and Genetics of Development. In: Gibbs R, Kolb B, editors. *The neurobiology of brain and behavioral development*: Elsevier Inc.; 2017. p. 153-2010.
48. Simpkin AJ, Sayers A, Gilthorpe MS, Heron J, Tilling K. Modelling height in adolescence: a comparison of methods for estimating the age at peak height velocity. *Ann Hum Biol.* 2017;44(8):715-22.
49. Almstrup K, Lindhardt Johansen M, Busch AS, Hagen CP, Nielsen JE, Petersen JH, et al. Pubertal development in healthy children is mirrored by DNA methylation patterns in peripheral blood. *Scientific Reports.* 2016;6(1):28657.
50. Fleischer T, Ulke C, Beutel M, Binder H, Brähler E, Johar H, et al. The relation between childhood adversity and adult obesity in a population-based study in women and men. *Scientific Reports.* 2021;11(1):14068.
51. Lynch L, Waite R, Davey MP. Adverse Childhood Experiences and Diabetes in Adulthood: Support for a Collaborative Approach to Primary Care. *Contemporary Family Therapy.* 2013;35(4):639-55.
52. Reed ZE, Suderman MJ, Relton CL, Davis OSP, Hemani G. The association of DNA methylation with body mass index: distinguishing between predictors and biomarkers. *Clinical epigenetics.* 2020;12(1):50.
53. Zafar MI, Mills K, Ye X, Blakely B, Min J, Kong W, et al. Association between the expression of vascular endothelial growth factors and metabolic syndrome or its components: a systematic review and meta-analysis. *Diabetology & Metabolic Syndrome.* 2018;10(1):62.
54. Lin JE, Neylan TC, Epel E, O'Donovan A. Associations of childhood adversity and adulthood trauma with C-reactive protein: A cross-sectional population-based study. *Brain Behav Immun.* 2016;53:105-12.
55. Barker ED, Cecil CAM, Walton E, Houtepen LC, O'Connor TG, Danese A, et al. Inflammation-related epigenetic risk and child and adolescent mental health: A prospective study from pregnancy to middle adolescence. *Development and Psychopathology.* 2018;30(3):1145-56.
56. Ligthart S, Marzi C, Aslibekyan S, Mendelson MM, Conneely KN, Tanaka T, et al. DNA methylation signatures of chronic low-grade inflammation are associated with complex diseases. *Genome biology.* 2016;17(1):255.
57. Kaur G, Begum R, Thota S, Batra S. A systematic review of smoking-related epigenetic alterations. *Archives of Toxicology.* 2019;93(10):2715-40.
58. Duffy KA, McLaughlin KA, Green PA. Early life adversity and health-risk behaviors: proposed psychological and neural mechanisms. *Annals of the New York Academy of Sciences.* 2018;1428(1):151-69.
59. Maechler M, Rousseeuw P, Struyt A, Hubert M. *cluster: Cluster Analysis Basics and Extensions*. R Package Version 2.0.1.
60. McLaughlin KA, Sheridan MA, Lambert HK. Childhood adversity and neural development: deprivation and threat as distinct dimensions of early experience. *Neurosci Biobehav Rev.* 2014;47:578-91.
61. Johnson D, Policelli J, Li M, Dharamsi A, Hu Q, Sheridan MA, et al. Associations of Early-Life Threat and Deprivation With Executive Functioning in Childhood and Adolescence: A Systematic Review and Meta-analysis. *JAMA pediatrics.* 2021:e212511-e.
62. Sumner JA, Gambazza S, Gao X, Baccarelli AA, Uddin M, McLaughlin KA. Epigenetics of early-life adversity in youth: cross-sectional and longitudinal associations. *Clinical epigenetics.* 2022;14(1):48.



## SUPPLEMENTAL TABLES

**Table S1. Summary of the childhood adversity variables analyzed in the present study.**

| Adversity                                    | Respondent         | Questionnaire items                                                                                                                                                                                                    | Exposure classification                                                                                                                                                                                                                                                                                                                                                                                 | Assessment timepoints (question range)                                                                                                                                                                                                                              |
|----------------------------------------------|--------------------|------------------------------------------------------------------------------------------------------------------------------------------------------------------------------------------------------------------------|---------------------------------------------------------------------------------------------------------------------------------------------------------------------------------------------------------------------------------------------------------------------------------------------------------------------------------------------------------------------------------------------------------|---------------------------------------------------------------------------------------------------------------------------------------------------------------------------------------------------------------------------------------------------------------------|
| <b>Caregiver physical or emotional abuse</b> | Mother and partner | 1) your partner was physically cruel to your children,<br>2) you were physically cruel to your children,<br>3) your partner was emotionally cruel to your children,<br>4) you were emotionally cruel to your children. | <u>Exposed</u> : mother, the partner, or both, endorsed any of the items.<br><br><u>Unexposed</u> : any negative response and no positive response.<br><br><u>Missing</u> : all questions unanswered.                                                                                                                                                                                                   | 8 months (since birth)<br>1.75 years (since age 8 months)<br>2.75 years (since age 18 months)<br>4 years (since age 2.5)<br>5 years (in past year)<br>6 years (since age 5)<br>9 years (since age 8)<br>11 years (since age 9)                                      |
| <b>Sexual or physical abuse</b>              | Mother             | 1) an item asking if the child was exposed to either sexual or physical abuse from anyone.                                                                                                                             | <u>Exposed</u> : an affirmative response was provided to either item.<br><br><u>Unexposed</u> : any negative response was available and no positive response was provided.<br><br><u>Missing</u> : both questions unanswered.                                                                                                                                                                           | 1.5 years (since age 6 months)<br>2.5 years (since age 18 months)<br>3.5 years (in past year)<br>4.75 years (since age 3)<br>5.75 years (in past 15 months)<br>6.75 years (since age 5)<br>8 years (since age 7)                                                    |
| <b>Maternal psychopathology</b>              | Mother             | 1) the Crown-Crisp Experiential Index (CCEI), assessing anxiety and depression,<br>2) the Edinburgh Postnatal Depression Scale (EPDS),<br>3) a question asking about suicide attempts                                  | <u>Exposed</u> : one or more of the following criteria was met:<br>1) CCEI depression score > 9<br>2) CCEI anxiety score > 10<br>3) EPDS score > 12<br>4) a suicide attempt since the time of the last interview<br><br><u>Unexposed</u> : none of the above criteria above were met and none of the scores were missing.<br><br><u>Missing</u> : Any of the prorated scales or questions were missing. | 8 months (1,2=current; 3=since birth)<br>1.75 years (1,2=current; 3=since age 8 months)<br>2.75 years (1,2=current; 3=since age 18 months)<br>5 years (1,2=current; 3=in past year)<br>6 years (1,2=current; 3=since age 5)<br>11 years(1,2=current; 3=since age 9) |
| <b>One adult in the household</b>            | Mother             | 1) an item asking about the number of adults (>18 years of age) living in the household.                                                                                                                               | <u>Exposed</u> : fewer than two adults were residing in the household.<br><br><u>Unexposed</u> : two adults or more were residing in the household.<br><br><u>Missing</u> : question unanswered.                                                                                                                                                                                                        | 8 months (current)<br>1.75 years (current)<br>2.75 years (current)<br>4 years (current)<br>7 years (current)<br>8 years (current)<br>10 years (current)                                                                                                             |
| <b>Family instability</b>                    | Mother             | Child<br>1) taken into care,<br>2) separated from their mother for two or more weeks,<br>3) separated from their father for two or more weeks,<br>4) acquired a new parent.                                            | <u>Exposed</u> : at least two of these events occurred at a single time point.<br><br><u>Unexposed</u> : none of the events occurred at a single time point and no questions were missing.<br><br><u>Missing</u> : any question was unanswered.                                                                                                                                                         | 1.5 years (since age 6 months)<br>2.5 years (since age 18 months)<br>3.5 years (in past year)<br>4.75 years (since age 3)<br>5.75 years (in past 15 months)<br>6.75 years (since age 5)<br>8 years (since age 7)                                                    |

|                                  |        |                                                                                                                                                                                                                                                                                                                                                                                                                            |                                                                                                                                                                                                                                                                            |                                                                                                                                                     |
|----------------------------------|--------|----------------------------------------------------------------------------------------------------------------------------------------------------------------------------------------------------------------------------------------------------------------------------------------------------------------------------------------------------------------------------------------------------------------------------|----------------------------------------------------------------------------------------------------------------------------------------------------------------------------------------------------------------------------------------------------------------------------|-----------------------------------------------------------------------------------------------------------------------------------------------------|
| <b>Financial hardship</b>        | Mother | <p>Family had difficulty affording the following items, coded on a Likert-type scale (1=not difficult; 2=slightly difficult; 3=fairly difficult; 4=very difficult):</p> <ol style="list-style-type: none"> <li>1) items for the child,</li> <li>2) rent or mortgage,</li> <li>3) heating,</li> <li>4) clothing,</li> <li>5) food.</li> </ol>                                                                               | <p><u>Exposed</u>: mothers reported at least fair difficulty for three or more items at each time point.</p> <p><u>Unexposed</u>: mothers reported on all five items, but the above criterion was not met.</p> <p><u>Missing</u>: any question unanswered.</p>             | <p>8 months (current)<br/> 1.75 years (current)<br/> 2.75 years (current)<br/> 5 years (current)<br/> 7 years (current)<br/> 11 years (current)</p> |
| <b>Neighborhood disadvantage</b> | Mother | <p>The following problems happened in the neighborhood (2=serious problem, 1=minor problem, 0=not a problem or no opinion):</p> <ol style="list-style-type: none"> <li>1) noise from other homes,</li> <li>2) noise from the street,</li> <li>3) garbage on the street,</li> <li>4) dog dirt,</li> <li>5) vandalism,</li> <li>6) worry about burglary,</li> <li>7) mugging,</li> <li>8) disturbance from youth.</li> </ol> | <p><u>Exposed</u>: scores <math>\geq 8</math> of the total sum of questions, corresponding to the 95th percentile of exposure.</p> <p><u>Unexposed</u>: scores were <math>&lt; 8</math> and no questions were missing.</p> <p><u>Missing</u>: any question unanswered.</p> | <p>1.75 years (current)<br/> 2.75 years (current)<br/> 5 years (current)<br/> 7 years (current)<br/> 10 years (current)</p>                         |

**Table S2. Distribution of the accumulation score for each type of adversity**

| Adversity                             | N   | Mean | SD   | Accumulation score (% of participants) |      |     |     |     |     |     |     |     |
|---------------------------------------|-----|------|------|----------------------------------------|------|-----|-----|-----|-----|-----|-----|-----|
|                                       |     |      |      | 0                                      | 1    | 2   | 3   | 4   | 5   | 6   | 7   | 8   |
| Caregiver physical or emotional abuse | 661 | 0.37 | 1.01 | 81.7                                   | 9.2  | 5.1 | 1.2 | 0.5 | 1.7 | 0.5 | -   | 0.2 |
| Sexual or physical abuse (by anyone)  | 663 | 0.24 | 0.65 | 84.6                                   | 10.3 | 2.6 | 2.0 | 0.6 | -   | -   | -   | -   |
| Family instability                    | 649 | 0.24 | 0.66 | 83.5                                   | 11.9 | 2.5 | 1.2 | 0.8 | 0.2 | -   | -   | -   |
| Financial hardship                    | 609 | 0.41 | 0.96 | 78.3                                   | 11.3 | 4.8 | 3.0 | 1.8 | 0.7 | 0.2 | -   | -   |
| Maternal psychopathology              | 639 | 0.66 | 1.23 | 67.6                                   | 16.0 | 7.2 | 4.5 | 2.4 | 1.3 | 1.1 | -   | -   |
| Neighborhood disadvantage             | 642 | 0.39 | 1.18 | 84.1                                   | 7.6  | 2.7 | 1.7 | 1.1 | 0.9 | 0.9 | 0.9 | -   |
| One adult in the household            | 665 | 0.27 | 0.81 | 86.2                                   | 7.2  | 3.0 | 1.7 | 1.1 | 0.9 | -   | -   | -   |

**Table S3. Distribution of covariates in the total ALSPAC sample, ARIES subsample, and among those exposed to any adversity between age 0-11.**

|                          | ALSPAC<br>(N=14,885) | ARIES*<br>(N=966) | Exposed to any<br>adversity (N=647) | ALSPAC<br>vs. ARIES | ALSPAC<br>vs. Exposed | ARIES vs.<br>Exposed  |
|--------------------------|----------------------|-------------------|-------------------------------------|---------------------|-----------------------|-----------------------|
|                          | N (%)                | N (%)             | N (%)                               |                     |                       | $\chi^2$ test p-value |
| Sex                      |                      |                   |                                     | 0.068               | 0.11                  | 0.99                  |
| Male                     | 7535 (51.3)          | 466 (48.2)        | 311 (48.1)                          |                     |                       |                       |
| Female                   | 7148 (48.7)          | 500 (51.8)        | 336 (51.9)                          |                     |                       |                       |
| Race/Ethnicity           |                      |                   |                                     | 0.007               | 0.38                  | 0.28                  |
| White                    | 11468 (95.0)         | 900 (97)          | 596 (95.8)                          |                     |                       |                       |
| Non-white                | 609 (5)              | 28 (3)            | 26 (4.2)                            |                     |                       |                       |
| Maternal education       |                      |                   |                                     | <0.001              | <0.001                | 0.49                  |
| less than O-level        | 3728 (30)            | 152 (16.1)        | 118 (18.6)                          |                     |                       |                       |
| O-level                  | 4294 (34.6)          | 321 (34)          | 202 (31.8)                          |                     |                       |                       |
| A-level                  | 2791 (22.5)          | 279 (29.5)        | 194 (30.6)                          |                     |                       |                       |
| Degree or above          | 1599 (12.9)          | 193 (20.4)        | 121 (19.1)                          |                     |                       |                       |
| Maternal age at birth    |                      |                   |                                     | <0.001              | <0.001                | 0.68                  |
| Ages 15-19               | 650 (4.7)            | 9 (0.9)           | 9 (1.4)                             |                     |                       |                       |
| Ages 20-35               | 12354 (88.4)         | 858 (89.4)        | 572 (88.7)                          |                     |                       |                       |
| Age 36+                  | 968 (6.9)            | 93 (9.7)          | 64 (9.9)                            |                     |                       |                       |
| Smoking during pregnancy |                      |                   |                                     | <0.001              | <0.001                | 0.19                  |
| Smoker                   | 2557 (21.1)          | 98 (10.7)         | 80 (13.1)                           |                     |                       |                       |
| Non-smoker               | 9536 (78.9)          | 814 (89.3)        | 532 (86.9)                          |                     |                       |                       |
| Previous pregnancies     |                      |                   |                                     | 0.004               | 0.1                   | 0.96                  |
| 0                        | 5770 (44.6)          | 439 (47.1)        | 295 (47.0)                          |                     |                       |                       |
| 1                        | 4539 (35)            | 346 (37.1)        | 229 (36.5)                          |                     |                       |                       |
| 2                        | 1848 (14.3)          | 113 (12.1)        | 77 (12.3)                           |                     |                       |                       |
| 3+                       | 767 (5.9)            | 34 (3.6)          | 26 (4.1)                            |                     |                       |                       |
| Birthweight              |                      |                   |                                     | <0.001              | <0.001                | 0.98                  |
| < 3000                   | 3646 (24.8)          | 149 (15.4)        | 101 (15.6)                          |                     |                       |                       |
| 3000 - 3499              | 4922 (33.5)          | 339 (35.1)        | 228 (35.2)                          |                     |                       |                       |
| 3500 - 3999              | 4378 (29.8)          | 331 (34.3)        | 216 (33.4)                          |                     |                       |                       |
| >= 4000                  | 1734 (11.8)          | 147 (15.2)        | 102 (15.8)                          |                     |                       |                       |

\*The ARIES subsample with DNA methylation data collected at age 15-17, without twins.

P-values, used to evaluate whether distributions differed across each sample comparison, were determined by chi-square tests. Maternal education values are presented from lowest level of education (less than O-level) to highest (degree or above). Differences between the total sample number and each variable are due to missing values (not shown in table).

**Table S4. Prevalence and correlations between adversities occurring from age 0-11.**

| <b>Adversity</b>                      | <b>Prevalence (% any exposure)<sup>1</sup></b> | <b>Average within adversity correlation<sup>2</sup></b> | <b>Average correlation with other adversities<sup>3</sup></b> |
|---------------------------------------|------------------------------------------------|---------------------------------------------------------|---------------------------------------------------------------|
| Caregiver physical or emotional abuse | 18.1                                           | 0.562                                                   | 0.137                                                         |
| Sexual or physical abuse (by anyone)  | 15.1                                           | 0.402                                                   | 0.090                                                         |
| Family instability                    | 24.4                                           | 0.597                                                   | 0.153                                                         |
| Financial hardship                    | 15.9                                           | 0.357                                                   | -0.035                                                        |
| Maternal psychopathology              | 34.8                                           | 0.611                                                   | 0.161                                                         |
| Neighborhood disadvantage             | 16.1                                           | 0.741                                                   | 0.112                                                         |
| One adult in the household            | 17.9                                           | 0.786                                                   | 0.127                                                         |

<sup>1</sup>Prevalence of any exposure to adversity between the ages of 0 and 11.

<sup>2</sup>Average tetrachoric correlation of exposure to adversity between different timepoints across development.

<sup>3</sup>Average tetrachoric correlation of exposure to different types of adversity across development.

**Table S5. Annotated loci identified at age 15.**

| Adversity                             | Timing               | Age (years)      | CpG               | Chr        | Coordinate       | Nearest Gene   | Distance to gene | Relation to CGI | Enhancer | Promoter | pLI            |
|---------------------------------------|----------------------|------------------|-------------------|------------|------------------|----------------|------------------|-----------------|----------|----------|----------------|
| Caregiver physical or emotional abuse | Early childhood      | 5                | cg14855874        | 4          | 102712397        | BANK1          | 0                | S_Shore         | 1        | 0        | 1.8E-10        |
|                                       |                      |                  | cg15454534        | 1          | 248569605        | OR2T1          | 0                | OpenSea         | 0        | 0        | 7.3E-07        |
|                                       |                      |                  | cg06215562        | 13         | 82344645         |                |                  | OpenSea         | 1        | 0        |                |
| Sexual or physical abuse (by anyone)  | Early childhood      | 3.5              | <b>cg26970800</b> | <b>11</b>  | <b>59614212</b>  | <b>CBLIF</b>   | <b>1237</b>      | <b>OpenSea</b>  | <b>0</b> | <b>0</b> |                |
|                                       |                      |                  | <b>cg15723468</b> | <b>1</b>   | <b>230387268</b> | <b>GALNT2</b>  | <b>0</b>         | <b>OpenSea</b>  | <b>0</b> | <b>0</b> | <b>8.8E-01</b> |
|                                       |                      |                  | <b>cg17928317</b> | <b>X</b>   | <b>140982278</b> | <b>MAGEC3</b>  | <b>0</b>         | <b>OpenSea</b>  | <b>0</b> | <b>0</b> | <b>3.2E-08</b> |
|                                       | Late childhood       | 8                | cg27558057        | X          | 70712724         | TAF1           | 0                | Island          | 0        | 1        | 1.00           |
| Family instability                    | Very early childhood | 2.5              | cg02735620        | 4          | 88950514         | PKD2           | 0                | OpenSea         | 1        | 0        | 1.00           |
| Financial hardship                    | Very early childhood | 0.66             | cg14455319        | 11         | 113258908        | ANKK1          | 0                | S_Shore         | 1        | 0        | 2.5E-08        |
|                                       |                      |                  | cg13204236        | 2          | 47476732         | STPG4          | 72991            | OpenSea         | 1        | 0        |                |
|                                       | Early childhood      | 5                | cg15037420        | 19         | 48474386         | BSPH1          | 0                | OpenSea         | 0        | 0        |                |
|                                       |                      |                  | cg06410970        | 10         | 81921424         | ANXA11         | 0                | OpenSea         | 1        | 0        | 3.5E-06        |
|                                       | Late childhood       | 11               | cg02011706        | 16         | 891283           | LMF1           | 12350            | N_Shelf         | 0        | 0        | 1.1E-14        |
|                                       |                      |                  | cg04659536        | 7          | 4218154          | SDK1           | 0                | OpenSea         | 0        | 0        | 5.0E-03        |
|                                       | Recency              |                  |                   | cg17670999 | 8                | 145928398      | ARHGAP39         | 17203           | S_Shelf  | 0        | 0              |
| cg25459301                            |                      |                  |                   | 8          | 10941183         | XKR6           | 0                | OpenSea         | 1        | 0        | 9.6E-01        |
| cg06812747                            |                      |                  |                   | 16         | 742426           | FBXL16         | 72               | N_Shore         | 0        | 0        | 9.5E-01        |
| Maternal psychopathology              | Very early childhood | 2.75             | <b>cg16813552</b> | <b>10</b>  | <b>103544649</b> | <b>OGA</b>     | <b>0</b>         | <b>S_Shore</b>  | <b>0</b> | <b>0</b> |                |
| Neighborhood disadvantage             | Very early childhood | 2.75             | cg04288299        | 4          | 1988825          | NELFA          | 0                | S_Shore         | 0        | 0        | 1.7E-01        |
|                                       |                      |                  | cg25019631        | 1          | 15850977         | CASP9          | 0                | N_Shore         | 0        | 1        | 3.2E-03        |
|                                       |                      |                  | cg04224851        | 2          | 43304158         | ZFP36L2        | 145381           | OpenSea         | 1        | 0        | 4.6E-01        |
| One adult in the household            | Very early childhood | 1.75             | <b>cg05491478</b> | <b>2</b>   | <b>238621313</b> | <b>LRRFIP1</b> | <b>0</b>         | <b>OpenSea</b>  | <b>0</b> | <b>0</b> | <b>3.7E-01</b> |
|                                       | Early childhood      | 3.9              | <b>cg16907527</b> | <b>6</b>   | <b>43744388</b>  | <b>VEGFA</b>   | <b>0</b>         | <b>OpenSea</b>  | <b>1</b> | <b>0</b> |                |
|                                       |                      |                  | <b>cg08818094</b> | <b>4</b>   | <b>26806047</b>  | <b>TBC1D19</b> | <b>49128</b>     | <b>OpenSea</b>  | <b>1</b> | <b>0</b> | <b>1.6E-02</b> |
|                                       |                      |                  | <b>cg01060989</b> | <b>1</b>   | <b>221945814</b> | <b>DUSP10</b>  | <b>30297</b>     | <b>OpenSea</b>  | <b>1</b> | <b>0</b> | <b>5.0E-01</b> |
|                                       |                      |                  | <b>cg15814750</b> | <b>15</b>  | <b>53880678</b>  | <b>WDR72</b>   | <b>0</b>         | <b>OpenSea</b>  | <b>1</b> | <b>0</b> | <b>1.6E-16</b> |
|                                       |                      |                  | <b>cg15783822</b> | <b>12</b>  | <b>10999279</b>  | <b>PRR4</b>    | <b>0</b>         | <b>OpenSea</b>  | <b>0</b> | <b>0</b> | <b>1.0E-05</b> |
|                                       |                      |                  | <b>cg15864691</b> | <b>7</b>   | <b>27217606</b>  | <b>HOXA10</b>  | <b>0</b>         | <b>N_Shore</b>  | <b>0</b> | <b>0</b> | <b>6.8E-01</b> |
| <b>cg02584161</b>                     | <b>6</b>             | <b>156086665</b> |                   |            | <b>OpenSea</b>   | <b>1</b>       | <b>0</b>         |                 |          |          |                |

|                |    |                   |           |                  |                  |               |                |          |          |                |
|----------------|----|-------------------|-----------|------------------|------------------|---------------|----------------|----------|----------|----------------|
|                |    | <b>cg02810291</b> | <b>15</b> | <b>85973746</b>  | <b>AKAP13</b>    | <b>0</b>      | <b>OpenSea</b> | <b>1</b> | <b>0</b> | <b>8.5E-01</b> |
|                |    | <b>cg04036644</b> | <b>8</b>  | <b>1200583</b>   | <b>LOC286083</b> | <b>43709</b>  | <b>OpenSea</b> | <b>0</b> | <b>0</b> |                |
|                |    | <b>cg11811897</b> | <b>7</b>  | <b>47811084</b>  | <b>PKD1L1</b>    | <b>3164</b>   | <b>OpenSea</b> | <b>1</b> | <b>0</b> | <b>1.7E-23</b> |
|                |    | <b>cg15817130</b> | <b>5</b>  | <b>16742179</b>  | <b>MYO10</b>     | <b>0</b>      | <b>OpenSea</b> | <b>0</b> | <b>0</b> | <b>4.0E-03</b> |
|                |    | <b>cg06711254</b> | <b>2</b>  | <b>186924071</b> | <b>FSIP2</b>     | <b>226054</b> | <b>OpenSea</b> | <b>1</b> | <b>0</b> | <b>3.2E-08</b> |
|                |    | <b>cg19096460</b> | <b>4</b>  | <b>89490818</b>  | <b>HERC3</b>     | <b>22754</b>  | <b>OpenSea</b> | <b>1</b> | <b>0</b> | <b>7.2E-01</b> |
|                |    | cg18980650        | X         | 100130547        | NOX1             | 1212          | OpenSea        | 0        | 0        | 3.9E-04        |
|                |    | cg27504269        | 12        | 21524305         | SLCO1A2          | 0             | OpenSea        | 0        | 0        | 5.6E-15        |
| Late childhood | 10 | <b>cg12096528</b> | <b>19</b> | <b>6427642</b>   | <b>SLC25A41</b>  | <b>0</b>      | <b>S_Shore</b> | <b>0</b> | <b>0</b> | <b>6.0E-05</b> |
| Accumulation   |    | <b>cg00807464</b> | <b>12</b> | <b>111618977</b> | <b>CUX2</b>      | <b>0</b>      | <b>OpenSea</b> | <b>0</b> | <b>0</b> | <b>1.00</b>    |
|                |    | <b>cg10420609</b> | <b>6</b>  | <b>7538349</b>   | <b>DSP</b>       | <b>3519</b>   | <b>N_Shelf</b> | <b>0</b> | <b>0</b> | <b>1.00</b>    |
|                |    | <b>cg14579651</b> | <b>12</b> | <b>27429400</b>  | <b>STK38L</b>    | <b>0</b>      | <b>OpenSea</b> | <b>1</b> | <b>0</b> | <b>9.7E-01</b> |

\* CGI = CpG Island; Chr = chromosome; pLI = probability of intolerance to loss of function (Exome Aggregation Consortium). Bolded loci passed a 5% FDR threshold of in the original analysis.

**Table S6. Correlation of DNAm in brain and blood for age 15 loci.**

| Adversity                             | Timing               | Age (years)     | CpG               | PFC             |                 | EC              |                 | STG             |                 | CER           |                 |
|---------------------------------------|----------------------|-----------------|-------------------|-----------------|-----------------|-----------------|-----------------|-----------------|-----------------|---------------|-----------------|
|                                       |                      |                 |                   | r               | p-value         | r               | p-value         | r               | p-value         | r             | p-value         |
| Caregiver physical or emotional abuse | Early childhood      | 5               | cg14855874        | 0.213           | 6.78E-02        | 0.269           | 2.35E-02        | 0.444           | 6.61E-05        | 0.239         | 4.46E-02        |
|                                       |                      |                 | cg15454534        | 0.059           | 6.16E-01        | 0.072           | 5.51E-01        | -0.033          | 7.81E-01        | 0.145         | 2.28E-01        |
|                                       |                      |                 | cg06215562        | 0.068           | 5.65E-01        | 0.014           | 9.07E-01        | -0.023          | 8.46E-01        | -0.067        | 5.80E-01        |
| Sexual or physical abuse (by anyone)  | Early childhood      | 3.5             | <b>cg26970800</b> | <b>-0.097</b>   | <b>4.09E-01</b> | <b>0.016</b>    | <b>8.94E-01</b> | <b>0.067</b>    | <b>5.67E-01</b> | <b>-0.029</b> | <b>8.11E-01</b> |
|                                       |                      |                 | <b>cg15723468</b> | <b>0.035</b>    | <b>7.69E-01</b> | <b>-0.106</b>   | <b>3.81E-01</b> | <b>-0.024</b>   | <b>8.38E-01</b> | <b>0.103</b>  | <b>3.94E-01</b> |
|                                       |                      |                 | <b>cg17928317</b> | <b>0.649</b>    | <b>4.08E-10</b> | <b>0.6</b>      | <b>3.10E-08</b> | <b>0.61</b>     | <b>6.23E-09</b> | <b>0.538</b>  | <b>1.34E-06</b> |
|                                       | Late childhood       | 8               | cg27558057        | 0.95            | 4.40E-38        | 0.947           | 9.22E-36        | 0.914           | 2.91E-30        | 0.882         | 2.80E-24        |
| Family instability                    | Very early childhood | 2.5             | cg02735620        | -0.061          | 6.03E-01        | -0.027          | 8.24E-01        | 0.119           | 3.09E-01        | -0.071        | 5.56E-01        |
| Financial hardship                    | Very early childhood | 0.66            | cg14455319        | 0.318           | 5.71E-03        | 0.246           | 3.88E-02        | 0.406           | 3.04E-04        | 0.074         | 5.41E-01        |
|                                       |                      |                 | cg13204236        | -0.025          | 8.30E-01        | 0.091           | 4.48E-01        | 0.001           | 9.92E-01        | -0.101        | 4.00E-01        |
|                                       | Early childhood      | 5               | cg15037420        | 0.065           | 5.81E-01        | -0.002          | 9.88E-01        | -0.069          | 5.58E-01        | 0.057         | 6.36E-01        |
|                                       |                      |                 | cg06410970        | -0.083          | 4.80E-01        | -0.003          | 9.78E-01        | 0.112           | 3.37E-01        | -0.024        | 8.43E-01        |
|                                       |                      |                 | Late childhood    | 11              | cg02011706      | 0.062           | 5.99E-01        | 0.141           | 2.42E-01        | 0.084         | 4.72E-01        |
|                                       | Recency              |                 | cg04659536        | 0.952           | 8.82E-39        | 0.953           | 1.17E-37        | 0.935           | 1.41E-34        | 0.968         | 4.84E-43        |
|                                       |                      |                 | cg17670999        | -0.039          | 7.42E-01        | 0.089           | 4.60E-01        | 0.139           | 2.36E-01        | -0.199        | 9.87E-02        |
|                                       |                      |                 | cg25459301        | 0.39            | 5.83E-04        | 0.228           | 5.62E-02        | 0.059           | 6.14E-01        | 0.211         | 7.78E-02        |
|                                       |                      |                 | cg06812747        | 0.075           | 5.26E-01        | -0.107          | 3.74E-01        | -0.037          | 7.53E-01        | -0.158        | 1.89E-01        |
| Maternal psychopathology              | Very early childhood | 2.75            | <b>cg16813552</b> | <b>0.02</b>     | <b>8.69E-01</b> | <b>-0.035</b>   | <b>7.72E-01</b> | <b>0.019</b>    | <b>8.74E-01</b> | <b>0.173</b>  | <b>1.50E-01</b> |
| Neighborhood disadvantage             | Very early childhood | 2.75            | cg04288299        | -0.137          | 2.44E-01        | -0.007          | 9.52E-01        | -0.213          | 6.67E-02        | -0.192        | 1.09E-01        |
|                                       |                      |                 | cg25019631        | -0.043          | 7.17E-01        | 0.017           | 8.88E-01        | -0.037          | 7.50E-01        | -0.047        | 6.96E-01        |
|                                       |                      |                 | cg04224851        | 0.201           | 8.62E-02        | 0.092           | 4.46E-01        | -0.147          | 2.09E-01        | 0.05          | 6.81E-01        |
| One adult in the household            | Very early childhood | 1.75            | <b>cg05491478</b> | <b>-0.085</b>   | <b>4.70E-01</b> | <b>0.112</b>    | <b>3.51E-01</b> | <b>-0.058</b>   | <b>6.22E-01</b> | <b>0.057</b>  | <b>6.36E-01</b> |
|                                       |                      |                 | <b>cg16907527</b> | <b>0.066</b>    | <b>5.74E-01</b> | <b>-0.008</b>   | <b>9.48E-01</b> | <b>-0.062</b>   | <b>6.00E-01</b> | <b>0.051</b>  | <b>6.74E-01</b> |
|                                       |                      |                 | <b>cg08818094</b> | <b>0.088</b>    | <b>4.54E-01</b> | <b>0.041</b>    | <b>7.35E-01</b> | <b>0.151</b>    | <b>1.97E-01</b> | <b>-0.086</b> | <b>4.77E-01</b> |
|                                       |                      |                 | <b>cg01060989</b> | <b>0.034</b>    | <b>7.75E-01</b> | <b>-0.038</b>   | <b>7.55E-01</b> | <b>0.076</b>    | <b>5.15E-01</b> | <b>-0.033</b> | <b>7.86E-01</b> |
|                                       |                      |                 | <b>cg15814750</b> | <b>-0.02</b>    | <b>8.63E-01</b> | <b>-0.241</b>   | <b>4.27E-02</b> | <b>0.004</b>    | <b>7.21E-01</b> | <b>-0.029</b> | <b>8.12E-01</b> |
|                                       |                      |                 | <b>cg15783822</b> | <b>0.041</b>    | <b>7.31E-01</b> | <b>-0.005</b>   | <b>9.70E-01</b> | <b>0.151</b>    | <b>1.96E-01</b> | <b>0.027</b>  | <b>8.26E-01</b> |
|                                       |                      |                 | <b>cg15864691</b> | <b>0.034</b>    | <b>7.72E-01</b> | <b>0.085</b>    | <b>4.80E-01</b> | <b>-0.074</b>   | <b>5.29E-01</b> | <b>-0.138</b> | <b>2.51E-01</b> |
| <b>cg02584161</b>                     | <b>0.166</b>         | <b>1.58E-01</b> | <b>-0.024</b>     | <b>8.45E-01</b> | <b>0.115</b>    | <b>3.25E-01</b> | <b>0.065</b>    | <b>5.89E-01</b> |                 |               |                 |



|                |    |                   |               |                 |               |                 |               |                 |               |                 |
|----------------|----|-------------------|---------------|-----------------|---------------|-----------------|---------------|-----------------|---------------|-----------------|
|                |    | <b>cg02810291</b> | <b>-0.185</b> | <b>1.15E-01</b> | <b>0.187</b>  | <b>1.18E-01</b> | <b>0.134</b>  | <b>2.50E-01</b> | <b>0.058</b>  | <b>6.32E-01</b> |
|                |    | <b>cg04036644</b> | <b>-0.081</b> | <b>4.92E-01</b> | <b>0.353</b>  | <b>2.53E-03</b> | <b>0.14</b>   | <b>2.33E-01</b> | <b>0.069</b>  | <b>5.66E-01</b> |
|                |    | <b>cg11811897</b> | <b>0.054</b>  | <b>6.46E-01</b> | <b>-0.034</b> | <b>7.76E-01</b> | <b>0.031</b>  | <b>7.90E-01</b> | <b>0.106</b>  | <b>3.79E-01</b> |
|                |    | <b>cg15817130</b> | <b>0.09</b>   | <b>4.48E-01</b> | <b>0.064</b>  | <b>5.95E-01</b> | <b>-0.036</b> | <b>7.57E-01</b> | <b>0.167</b>  | <b>1.63E-01</b> |
|                |    | <b>cg06711254</b> | <b>0.081</b>  | <b>4.95E-01</b> | <b>0.058</b>  | <b>6.30E-01</b> | <b>-0.133</b> | <b>2.54E-01</b> | <b>0.152</b>  | <b>2.07E-01</b> |
|                |    | <b>cg19096460</b> | <b>0.044</b>  | <b>7.13E-01</b> | <b>0.139</b>  | <b>1.39E-01</b> | <b>-0.036</b> | <b>7.61E-01</b> | <b>0.002</b>  | <b>9.88E-01</b> |
|                |    | cg18980650        | 0.375         | 9.81E-04        | 0.352         | 2.62E-03        | 0.177         | 1.28E-01        | 0.255         | 3.15E-02        |
|                |    | cg27504269        | -0.001        | 9.96E-01        | -0.066        | 5.82E-01        | -0.072        | 5.42E-01        | 0.072         | 5.51E-01        |
| Late childhood | 10 | <b>cg12096528</b> | <b>0.135</b>  | <b>2.50E-01</b> | <b>0.1</b>    | <b>4.06E-01</b> | <b>-0.181</b> | <b>1.21E-01</b> | <b>-0.118</b> | <b>3.26E-01</b> |
| Accumulation   |    | <b>cg00807464</b> | <b>-0.07</b>  | <b>5.52E-01</b> | <b>0.27</b>   | <b>2.25E-02</b> | <b>0.008</b>  | <b>9.43E-01</b> | <b>0.093</b>  | <b>4.43E-01</b> |
|                |    | <b>cg10420609</b> | <b>0.064</b>  | <b>5.89E-01</b> | <b>-0.095</b> | <b>4.29E-01</b> | <b>0.039</b>  | <b>7.41E-01</b> | <b>-0.023</b> | <b>8.50E-01</b> |
|                |    | <b>cg14579651</b> | <b>0.032</b>  | <b>7.84E-01</b> | <b>-0.117</b> | <b>3.29E-01</b> | <b>0.097</b>  | <b>4.09E-01</b> | <b>0.043</b>  | <b>7.24E-01</b> |

PFC = prefrontal cortex; EC = entorhinal cortex; STG = superior temporal gyrus; CER = cerebellum. Values represent the correlation between DNA methylation levels in blood and the specified brain regions, as reported by Hannon et al., 2015. Bolded loci passed a 5% FDR in the original analysis.

**Table S7. Associations between childhood adversity and age 15 DNAm using non-parametric bootstrap**

| Adversity                             | Timing               | Age (years)      | CpG               | Original effect estimate <sup>1</sup> | Bootstrap effect estimate <sup>2</sup> | Bootstrap bias <sup>3</sup> | % difference <sup>4</sup> |
|---------------------------------------|----------------------|------------------|-------------------|---------------------------------------|----------------------------------------|-----------------------------|---------------------------|
| Caregiver physical or emotional abuse | Early childhood      | 5                | cg14855874        | 3.01E-02                              | 3.02E-02                               | 6.81E-05                    | -0.23%                    |
|                                       |                      |                  | cg15454534        | -1.64E-02                             | -1.64E-02                              | 3.21E-06                    | 0.02%                     |
|                                       |                      |                  | cg06215562        | -2.11E-02                             | -2.10E-02                              | 2.27E-05                    | 0.11%                     |
| Sexual or physical abuse (by anyone)  | Early childhood      | 3.5              | <b>cg26970800</b> | <b>-5.47E-02</b>                      | <b>-5.45E-02</b>                       | <b>1.90E-04</b>             | <b>0.35%</b>              |
|                                       |                      |                  | <b>cg15723468</b> | <b>-4.52E-02</b>                      | <b>-4.51E-02</b>                       | <b>1.10E-04</b>             | <b>0.24%</b>              |
|                                       |                      |                  | <b>cg17928317</b> | <b>7.56E-02</b>                       | <b>7.54E-02</b>                        | <b>-2.07E-04</b>            | <b>0.27%</b>              |
|                                       | Late childhood       | 8                | cg27558057        | 1.07E-01                              | 1.05E-01                               | -1.86E-03                   | 1.74%                     |
| Family instability                    | Very early childhood | 2.5              | cg02735620        | -1.97E-02                             | -1.97E-02                              | -2.86E-05                   | -0.14%                    |
| Financial hardship                    | Very early childhood | 0.66             | cg14455319        | 5.29E-02                              | 5.26E-02                               | -3.25E-04                   | 0.61%                     |
|                                       |                      |                  | cg13204236        | -3.73E-02                             | -3.73E-02                              | -1.96E-05                   | -0.05%                    |
|                                       | Early childhood      | 5                | cg15037420        | -3.50E-02                             | -3.50E-02                              | 6.23E-05                    | 0.18%                     |
|                                       |                      |                  | cg06410970        | -3.41E-02                             | -3.41E-02                              | -2.45E-05                   | -0.07%                    |
|                                       | Late childhood       | 11               | cg02011706        | -6.39E-02                             | -6.44E-02                              | -4.63E-04                   | -0.72%                    |
|                                       |                      |                  | cg04659536        | -2.78E-02                             | -2.78E-02                              | 3.09E-06                    | 0.01%                     |
|                                       | Recency              |                  | cg17670999        | -2.10E-03                             | -2.06E-03                              | 4.27E-05                    | 2.03%                     |
|                                       |                      |                  | cg25459301        | -2.81E-03                             | -2.76E-03                              | 5.18E-05                    | 1.84%                     |
|                                       |                      |                  | cg06812747        | -2.75E-03                             | -2.75E-03                              | 3.38E-06                    | 0.12%                     |
| Maternal psychopathology              | Very early childhood | 2.75             | <b>cg16813552</b> | <b>-1.52E-02</b>                      | <b>-1.52E-02</b>                       | <b>6.59E-06</b>             | <b>0.04%</b>              |
| Neighborhood disadvantage             | Very early childhood | 2.75             | cg04288299        | -2.06E-02                             | -2.07E-02                              | -5.12E-05                   | -0.25%                    |
|                                       |                      |                  | cg25019631        | 4.43E-02                              | 4.44E-02                               | 1.29E-04                    | -0.29%                    |
|                                       |                      |                  | cg04224851        | -1.43E-02                             | -1.43E-02                              | -2.02E-05                   | -0.14%                    |
| One adult in the household            | Very early childhood | 1.75             | <b>cg05491478</b> | <b>-2.76E-02</b>                      | <b>-2.75E-02</b>                       | <b>5.17E-05</b>             | <b>0.19%</b>              |
|                                       |                      |                  |                   |                                       |                                        |                             |                           |
|                                       | Early childhood      | 3.9              | <b>cg16907527</b> | <b>-3.16E-02</b>                      | <b>-3.17E-02</b>                       | <b>-1.40E-04</b>            | <b>-0.44%</b>             |
|                                       |                      |                  | <b>cg08818094</b> | <b>-5.03E-02</b>                      | <b>-5.02E-02</b>                       | <b>4.75E-05</b>             | <b>0.09%</b>              |
|                                       |                      |                  | <b>cg01060989</b> | <b>-3.15E-02</b>                      | <b>-3.15E-02</b>                       | <b>-3.71E-05</b>            | <b>-0.12%</b>             |
|                                       |                      |                  | <b>cg15814750</b> | <b>-4.14E-02</b>                      | <b>-4.13E-02</b>                       | <b>8.80E-05</b>             | <b>0.21%</b>              |
|                                       |                      |                  | <b>cg15783822</b> | <b>-2.21E-02</b>                      | <b>-2.21E-02</b>                       | <b>3.63E-05</b>             | <b>0.16%</b>              |
|                                       |                      |                  | <b>cg15864691</b> | <b>-1.81E-02</b>                      | <b>-1.80E-02</b>                       | <b>5.27E-05</b>             | <b>0.29%</b>              |
| <b>cg02584161</b>                     | <b>-5.93E-02</b>     | <b>-5.93E-02</b> | <b>-4.89E-05</b>  | <b>-0.08%</b>                         |                                        |                             |                           |
| <b>cg02810291</b>                     | <b>-2.34E-02</b>     | <b>-2.33E-02</b> | <b>7.06E-05</b>   | <b>0.30%</b>                          |                                        |                             |                           |

|                |    |                   |                  |                  |                  |               |
|----------------|----|-------------------|------------------|------------------|------------------|---------------|
|                |    | <b>cg04036644</b> | <b>-2.62E-02</b> | <b>-2.61E-02</b> | <b>6.66E-05</b>  | <b>0.25%</b>  |
|                |    | <b>cg11811897</b> | <b>-4.83E-02</b> | <b>-4.81E-02</b> | <b>2.23E-04</b>  | <b>0.46%</b>  |
|                |    | <b>cg15817130</b> | <b>-3.81E-02</b> | <b>-3.81E-02</b> | <b>-3.42E-06</b> | <b>-0.01%</b> |
|                |    | <b>cg06711254</b> | <b>-5.80E-02</b> | <b>-5.80E-02</b> | <b>4.05E-05</b>  | <b>0.07%</b>  |
|                |    | <b>cg19096460</b> | <b>-2.49E-02</b> | <b>-2.50E-02</b> | <b>-8.09E-05</b> | <b>-0.32%</b> |
|                |    | cg18980650        | -3.68E-02        | -3.69E-02        | -1.77E-04        | -0.48%        |
|                |    | cg27504269        | -4.06E-02        | -4.05E-02        | 1.55E-04         | 0.38%         |
| Late childhood | 10 | <b>cg12096528</b> | <b>-1.66E-02</b> | <b>-1.65E-02</b> | <b>5.63E-05</b>  | <b>0.34%</b>  |
| Accumulation   |    | <b>cg00807464</b> | <b>3.21E-03</b>  | <b>3.18E-03</b>  | <b>-3.37E-05</b> | <b>1.05%</b>  |
|                |    | <b>cg10420609</b> | <b>-1.45E-02</b> | <b>-1.45E-02</b> | <b>1.36E-05</b>  | <b>0.09%</b>  |
|                |    | <b>cg14579651</b> | <b>-1.29E-02</b> | <b>-1.28E-02</b> | <b>5.16E-05</b>  | <b>0.40%</b>  |

<sup>1</sup> Effect estimate from the original linear regression of childhood adversity and DNAm at age 15 in the full ALSPAC sample.

<sup>2</sup> Average of effect estimates from the 10,000 bootstrapped analyses of childhood adversity and DNAm at age 15.

<sup>3</sup> Difference in effect estimates between the bootstrapped and original sample.

<sup>4</sup> Percent change in absolute effect estimate between the original and bootstrapped analyses.

\*Bolded loci passed a 5% FDR threshold in the original analysis.

**Table S8. Replication of one-adult household associations in the Raine Study.**

| CpG               | Timing               | ALSPAC (discovery results) |                 |                      |                 | ALSPAC (Winner's curse corrected) <sup>§</sup> |                       |                 | The Raine Study      |                 |                         |                 |
|-------------------|----------------------|----------------------------|-----------------|----------------------|-----------------|------------------------------------------------|-----------------------|-----------------|----------------------|-----------------|-------------------------|-----------------|
|                   |                      | Age (years)                | Effect estimate | 95% CI               | P-value         | Effect estimate                                | 95% CI                | P-value         | Age (years)          | Effect estimate | 95% CI                  | P-value         |
| cg05491478        | Very early childhood | 1.75                       | -0.027          | -0.18; -0.09         | 7.33E-07        | -0.022                                         | -0.036; -0.003        | 2.08E-06        | 2y (N=448)           | -0.0011         | -0.004; 0.0018          | 4.57E-01        |
| cg16907527        | Early childhood      | 3.9                        | -0.032          | -0.23; -0.138        | 4.17E-10        | -0.031                                         | -0.041; -0.021        | 5.26E-11        | 3y (N=510)           | -0.0026         | -0.0086; 0.0034         | 4.00E-01        |
| cg08818094        |                      |                            | -0.05           | -0.37; -0.212        | 8.79E-09        | -0.049                                         | -0.066; -0.028        | 3.49E-09        |                      | -0.0031         | -0.008; 0.0018          | 2.08E-01        |
| cg01060989        |                      |                            | -0.031          | -0.24; -0.135        | 6.73E-08        | -0.030                                         | -0.041; -0.016        | 1.19E-08        |                      | -0.0005         | -0.0046; 0.0036         | 8.12E-01        |
| cg15814750        |                      |                            | -0.04           | -0.33; -0.166        | 6.57E-07        | -0.031                                         | -0.053; -0.003        | 3.87E-06        |                      | 0.0031          | -0.0043; 0.0104         | 4.09E-01        |
| <b>cg15783822</b> |                      |                            | <b>-0.021</b>   | <b>-0.17; -0.088</b> | <b>8.08E-07</b> | <b>-0.018</b>                                  | <b>-0.029; -0.003</b> | <b>1.47E-06</b> |                      | <b>-0.0038</b>  | <b>-0.0071; -0.0004</b> | <b>2.91E-02</b> |
| cg15864691        |                      |                            | -0.018          | -0.14; -0.071        | 8.36E-07        | -0.016                                         | -0.024; -0.004        | 4.80E-07        |                      | -0.0021         | -0.0053; 0.0011         | 2.06E-01        |
| <b>cg02584161</b> |                      |                            | <b>-0.058</b>   | <b>-0.45; -0.236</b> | <b>1.28E-06</b> | <b>-0.053</b>                                  | <b>-0.078; -0.016</b> | <b>2.85E-07</b> |                      | <b>-0.0072</b>  | <b>-0.0142; -0.0002</b> | <b>4.46E-02</b> |
| cg02810291        |                      |                            | -0.023          | -0.18; -0.092        | 1.35E-06        | -0.020                                         | -0.031; -0.004        | 9.18E-07        |                      | -0.0014         | -0.0114; 0.0085         | 7.79E-01        |
| cg04036644        |                      |                            | -0.026          | -0.21; -0.105        | 1.36E-06        | -0.023                                         | -0.035; -0.005        | 8.27E-07        |                      | -0.0024         | -0.0065; 0.0016         | 2.37E-01        |
| <b>cg11811897</b> |                      |                            | <b>-0.047</b>   | <b>-0.37; -0.191</b> | <b>1.68E-06</b> | <b>-0.041</b>                                  | <b>-0.064; -0.008</b> | <b>8.98E-07</b> |                      | <b>-0.0074</b>  | <b>-0.0126; -0.0021</b> | <b>6.39E-03</b> |
| cg15817130        |                      |                            | -0.038          | -0.29; -0.155        | 1.83E-06        | -0.036                                         | -0.05; -0.017         | 3.49E-08        |                      | -0.0057         | -0.0133; 0.0019         | 1.41E-01        |
| cg06711254        |                      |                            | -0.056          | -0.45; -0.227        | 2.15E-06        | -0.047                                         | -0.075; -0.007        | 1.57E-06        |                      | -0.0036         | -0.0124; 0.0052         | 4.22E-01        |
| cg19096460        |                      |                            | -0.024          | -0.2; -0.099         | 2.89E-06        | -0.019                                         | -0.032; -0.002        | 3.82E-06        |                      | -0.0015         | -0.0066; 0.0036         | 5.62E-01        |
| cg18980650        |                      |                            | -0.036          | -0.26; -0.131        | 3.31E-06        | -0.034                                         | -0.049; -0.014        | 8.07E-08        |                      | -0.0035         | -0.0114; 0.0043         | 3.78E-01        |
| cg27504269        |                      |                            | -0.04           | -0.31; -0.161        | 3.52E-06        | -0.036                                         | -0.053; -0.011        | 3.21E-07        |                      | -0.0041         | -0.0107; 0.0025         | 2.25E-01        |
| cg12096528        | Late childhood       | 10                         | -0.016          | -0.15; -0.076        | 2.24E-06        | -0.014                                         | -0.022; -0.002        | 1.19E-06        | 10y (N=529)          | 0.0003          | -0.0034; 0.004          | 8.72E-01        |
| cg00807464        | Accumulation         |                            | 0.003           | 0.07; 0.12           | 7.56E-07        | 0.003                                          | 0.001; 0.004          | 6.88E-08        | Accumulation (N=381) | 0.0004          | -0.0008; 0.0017         | 4.97E-01        |
| cg10420609        |                      |                            | -0.014          | -0.53; -0.278        | 7.71E-07        | -0.012                                         | -0.018; -0.004        | 3.46E-07        |                      | -0.0004         | -0.0025; 0.0016         | 6.75E-01        |
| cg14579651        |                      |                            | -0.012          | -0.49; -0.257        | 1.68E-06        | -0.010                                         | -0.016; -0.002        | 1.40E-06        |                      | -0.0015         | -0.0036; 0.0005         | 1.46E-01        |

\*Bolded CpGs passed a nominal  $p < 0.05$  in the Raine Study with 95% confidence intervals (CI) that did not overlap with zero.

<sup>§</sup> Estimates and confidence intervals corrected for winner's curse effects.

**Table S9. Replication of childhood adversity associations in the FFCWS cohort.**

| Adversity                             | CpG                      | Timing               | ALSPAC (discovery results) |                 |                |               | ALSPAC (Winner's curse corrected) <sup>§</sup> |                 |               | FFCWS       |      |                 |                 |                 |          |
|---------------------------------------|--------------------------|----------------------|----------------------------|-----------------|----------------|---------------|------------------------------------------------|-----------------|---------------|-------------|------|-----------------|-----------------|-----------------|----------|
|                                       |                          |                      | Age (years)                | Effect estimate | 95% CI         | P-value       | Effect estimate                                | 95% CI          | P-value       | Age (years) | N*   | Effect estimate | 95% CI          | P-value         |          |
| Caregiver physical or emotional abuse | cg14855874               | Early childhood      | 5                          | 0.030           | 0.02; 0.041    | 4.42E-08      | 0.029                                          | 0.013; 0.041    | 4.42E-08      | 5           | 1527 | -0.0005         | -0.006; 0.005   | 8.67E-01        |          |
|                                       | cg15454534               |                      |                            | -0.017          | -0.023; -0.01  | 1.71E-07      | -0.015                                         | -0.022; -0.005  | 1.71E-07      |             |      | 662             | 0.0014          | -0.002; 0.005   | 3.83E-01 |
|                                       | cg06215562               |                      |                            | -0.021          | -0.029; -0.013 | 4.46E-07      | -0.019                                         | -0.029; -0.005  | 4.46E-07      |             |      | 1527            | -0.00004        | -0.003; 0.002   | 9.76E-01 |
| Financial hardship                    | cg14455319               | Very early childhood | 0.66                       | 0.052           | 0.031; 0.074   | 1.94E-06      | 0.043                                          | 0.006; 0.07     | 1.94E-06      | 1           | 1859 | -0.0015         | -0.009; 0.006   | 7.17E-01        |          |
|                                       | cg13204236               |                      |                            | -0.037          | -0.051; -0.023 | 2.04E-07      | -0.034                                         | -0.05; -0.012   | 2.04E-07      |             |      | 1859            | -0.0029         | -0.007; 0.001   | 1.42E-01 |
|                                       | cg15037420               | Early childhood      | 5                          | -0.034          | -0.048; -0.02  | 1.89E-06      | -0.028                                         | -0.046; -0.004  | 1.89E-06      | 5           | 1845 | -0.0024         | -0.006; 0.001   | 1.31E-01        |          |
|                                       | cg06410970               |                      |                            | -0.033          | -0.046; -0.021 | 1.80E-07      | -0.031                                         | -0.045; -0.011  | 1.80E-07      |             |      | 1845            | -0.00064        | -0.002; 0.001   | 3.59E-01 |
|                                       | cg02011706               | Late childhood       | 11                         | -0.064          | -0.089; -0.038 | 9.99E-07      | -0.055                                         | -0.085; -0.011  | 9.99E-07      | 9           | 1859 | -0.0041         | -0.011; 0.003   | 2.64E-01        |          |
|                                       | cg04659536               |                      |                            | -0.028          | -0.039; -0.016 | 1.70E-06      | -0.023                                         | -0.037; -0.004  | 1.70E-06      |             |      | 1859            | -0.0014         | -0.004; 0.001   | 2.90E-01 |
|                                       | cg17670999               | Recency              |                            | -0.0020         | -0.003; -0.001 | 1.03E-06      | -0.0017                                        | -0.003; -0.0003 | 1.03E-06      |             | 722  | 0.00003         | -0.0001; 0.0002 | 7.32E-01        |          |
|                                       | cg25459301               |                      |                            | -0.0027         | -0.004; -0.002 | 5.54E-06      | -0.0020                                        | -0.004; -0.0002 | 5.54E-06      |             |      | 1661            | -0.00012        | -0.0004; 0.0001 | 3.74E-01 |
|                                       | cg06812747               |                      |                            | -0.0027         | -0.004; -0.002 | 2.81E-06      | -0.0021                                        | -0.004; -0.0003 | 2.81E-06      |             |      | 1661            | 0.00020         | -0.0001; 0.0005 | 1.46E-01 |
|                                       | Maternal psychopathology | cg16813552           | Very early childhood       | 2.75            | -0.015         | -0.021; -0.01 | 5.06E-08                                       | -0.014          | -0.02; -0.006 | 5.06E-08    | 1    | 1846            | 0.0015          | -0.001; 0.004   | 2.69E-01 |
| One-adult household                   | cg05491478               | Very early childhood | 1.75                       | -0.027          | -0.038; -0.016 | 2.08E-06      | -0.022                                         | -0.036; -0.003  | 2.08E-06      | 1           | 1842 | -0.0007         | -0.002; 0.0001  | 7.26E-02        |          |
|                                       | cg16907527               | Early childhood      | 3.9                        | -0.032          | -0.041; -0.022 | 5.26E-11      | -0.031                                         | -0.041; -0.021  | 5.26E-11      | 3           | 799  | -0.0010         | -0.004; 0.002   | 5.10E-01        |          |
|                                       | cg08818094               |                      |                            | -0.050          | -0.067; -0.034 | 3.49E-09      | -0.049                                         | -0.066; -0.028  | 3.49E-09      |             |      | 1842            | -0.0004         | -0.002; 0.001   | 5.58E-01 |
|                                       | cg01060989               |                      |                            | -0.031          | -0.041; -0.02  | 1.19E-08      | -0.030                                         | -0.041; -0.016  | 1.19E-08      |             | 799  | -0.0003         | -0.003; 0.002   | 8.36E-01        |          |
|                                       | cg15783822               |                      |                            | -0.021          | -0.03; -0.013  | 1.47E-06      | -0.018                                         | -0.029; -0.003  | 1.47E-06      |             | 1842 | 0.00000         | -0.002; 0.002   | 9.99E-01        |          |
|                                       | cg15864691               |                      |                            | -0.018          | -0.025; -0.011 | 4.80E-07      | -0.016                                         | -0.024; -0.004  | 4.80E-07      |             | 1842 | 0.0005          | -0.003; 0.004   | 7.99E-01        |          |
|                                       | cg02810291               |                      |                            | -0.023          | -0.032; -0.014 | 9.18E-07      | -0.020                                         | -0.031; -0.004  | 9.18E-07      |             | 1842 | -0.0016         | -0.005; 0.002   | 4.04E-01        |          |

|            |              |        |                   |          |        |                   |          |      |          |                  |          |
|------------|--------------|--------|-------------------|----------|--------|-------------------|----------|------|----------|------------------|----------|
| cg04036644 |              | -0.026 | -0.037;<br>-0.016 | 8.27E-07 | -0.023 | -0.035;<br>-0.005 | 8.27E-07 | 1842 | -0.0006  | -0.003;<br>0.002 | 6.10E-01 |
| cg11811897 |              | -0.047 | -0.066;<br>-0.029 | 8.98E-07 | -0.041 | -0.064;<br>-0.008 | 8.98E-07 | 1842 | 0.0004   | -0.003;<br>0.004 | 8.20E-01 |
| cg15817130 |              | -0.038 | -0.051;<br>-0.024 | 3.49E-08 | -0.036 | -0.05;<br>-0.017  | 3.49E-08 | 1842 | 0.0008   | -0.002;<br>0.004 | 5.42E-01 |
| cg06711254 |              | -0.056 | -0.079;<br>-0.034 | 1.57E-06 | -0.047 | -0.075;<br>-0.007 | 1.57E-06 | 1842 | -0.0068  | -0.017;<br>0.003 | 1.89E-01 |
| cg19096460 |              | -0.024 | -0.034;<br>-0.014 | 3.82E-06 | -0.019 | -0.032;<br>-0.002 | 3.82E-06 | 1842 | -0.00005 | -0.002;<br>0.002 | 9.67E-01 |
| cg18980650 |              | -0.036 | -0.049;<br>-0.023 | 8.07E-08 | -0.034 | -0.049;<br>-0.014 | 8.07E-08 | 799  | 0.0023   | -0.002;<br>0.007 | 3.33E-01 |
| cg27504269 |              | -0.040 | -0.055;<br>-0.025 | 3.21E-07 | -0.036 | -0.053;<br>-0.011 | 3.21E-07 | 1842 | -0.0046  | -0.018;<br>0.008 | 4.84E-01 |
| cg00807464 | Accumulation | 0.0031 | 0.002;<br>0.004   | 6.88E-08 | 0.0029 | 0.001;<br>0.004   | 6.88E-08 | 1659 | 0.0032   | -0.002;<br>0.009 | 2.45E-01 |

\*CpGs with lower N (<800) were measured on the 450K array only, resulting in a smaller sample size.

§ Estimates and confidence intervals corrected for winner's curse effects.

**Table S10. Sensitivity analysis of DNA methylation at birth (cord blood) for loci identified at age 15.**

| Adversity                             | Timing               | Age (years)  | CpG               | DNAm unexposed <sup>1</sup> | DNAm exp. SP <sup>2</sup> | $\Delta$ DNAm <sup>3</sup> | Effect estimate <sup>4</sup> | SE*             | 95% CI                 | P-value         | FDR-adjusted p-value |
|---------------------------------------|----------------------|--------------|-------------------|-----------------------------|---------------------------|----------------------------|------------------------------|-----------------|------------------------|-----------------|----------------------|
| Caregiver physical or emotional abuse | Early childhood      | 5            | cg14855874        | 0.099                       | 0.112                     | 0.013                      | 0.014                        | 0.007           | -0.0004; 0.028         | 5.60E-02        | 3.95E-01             |
|                                       |                      |              | cg15454534        | 0.866                       | 0.864                     | -0.003                     | -0.003                       | 0.005           | -0.0124; 0.0072        | 6.06E-01        | 8.78E-01             |
|                                       |                      |              | cg06215562        | 0.830                       | 0.825                     | -0.005                     | -0.005                       | 0.005           | -0.0154; 0.0055        | 3.52E-01        | 7.10E-01             |
| Sexual or physical abuse (by anyone)  | Early childhood      | 3.5          | <b>cg26970800</b> | <b>0.890</b>                | <b>0.901</b>              | <b>0.011</b>               | <b>0.012</b>                 | <b>0.013</b>    | <b>-0.0141; 0.0384</b> | <b>3.65E-01</b> | <b>7.10E-01</b>      |
|                                       |                      |              | <b>cg15723468</b> | <b>0.849</b>                | <b>0.835</b>              | <b>-0.014</b>              | <b>-0.015</b>                | <b>0.008</b>    | <b>-0.03; 0.0005</b>   | <b>5.80E-02</b> | <b>3.95E-01</b>      |
|                                       |                      |              | <b>cg17928317</b> | <b>0.690</b>                | <b>0.721</b>              | <b>0.032</b>               | <b>-0.019</b>                | <b>0.020</b>    | <b>-0.0575; 0.0203</b> | <b>3.49E-01</b> | <b>7.10E-01</b>      |
|                                       | Late childhood       | 8            | cg27558057        | 0.242                       | 0.231                     | -0.012                     | 0.076                        | 0.024           | 0.0276; 0.1238         | 2.09E-03        | 8.56E-02             |
| Family instability                    | Very early childhood | 2.5          | cg02735620        | 0.880                       | 0.881                     | 0.001                      | 0.000                        | 0.005           | -0.0093; 0.0092        | 9.86E-01        | 9.86E-01             |
| Financial hardship                    | Very early childhood | 0.66         | cg14455319        | 0.254                       | 0.281                     | 0.027                      | 0.028                        | 0.012           | 0.0055; 0.0513         | 1.54E-02        | 3.15E-01             |
|                                       |                      |              | cg13204236        | 0.858                       | 0.866                     | 0.007                      | 0.008                        | 0.007           | -0.0066; 0.0224        | 2.83E-01        | 7.10E-01             |
|                                       | Early childhood      | 5            | cg15037420        | 0.774                       | 0.763                     | -0.012                     | -0.012                       | 0.008           | -0.028; 0.0039         | 1.39E-01        | 5.39E-01             |
|                                       |                      |              | cg06410970        | 0.843                       | 0.857                     | 0.015                      | 0.015                        | 0.009           | -0.0024; 0.0319        | 9.08E-02        | 4.65E-01             |
|                                       | Late childhood       | 11           | cg02011706        | 0.837                       | 0.822                     | -0.014                     | -0.016                       | 0.019           | -0.053; 0.0211         | 3.99E-01        | 7.11E-01             |
| cg04659536                            |                      |              | 0.898             | 0.892                       | -0.005                    | -0.007                     | 0.007                        | -0.0204; 0.0073 | 3.53E-01               | 7.10E-01        |                      |
|                                       | Recency              |              | cg17670999        | 0.807                       | 0.807                     | 0.000                      | 0.000                        | 0.000           | -0.001; 0.0006         | 6.21E-01        | 8.78E-01             |
| cg25459301                            |                      |              | 0.757             | 0.765                       | 0.009                     | 0.001                      | 0.001                        | -0.0003; 0.0023 | 1.27E-01               | 5.39E-01        |                      |
| cg06812747                            |                      |              | 0.819             | 0.817                       | -0.003                    | -0.001                     | 0.001                        | -0.002; 0.0006  | 3.01E-01               | 7.10E-01        |                      |
| Maternal psychopathology              | Very early childhood | 2.75         | <b>cg16813552</b> | <b>0.899</b>                | <b>0.896</b>              | <b>-0.003</b>              | <b>-0.004</b>                | <b>0.003</b>    | <b>-0.0088; 0.0017</b> | <b>1.83E-01</b> | <b>6.25E-01</b>      |
| Neighborhood disadvantage             | Very early childhood | 2.75         | cg04288299        | 0.912                       | 0.921                     | 0.010                      | 0.002                        | 0.005           | -0.008; 0.0115         | 7.23E-01        | 8.84E-01             |
|                                       |                      |              | cg25019631        | 0.227                       | 0.228                     | 0.001                      | 0.004                        | 0.011           | -0.018; 0.0258         | 7.28E-01        | 8.84E-01             |
|                                       |                      |              | cg04224851        | 0.905                       | 0.903                     | -0.002                     | -0.001                       | 0.003           | -0.0071; 0.0052        | 7.58E-01        | 8.88E-01             |
| One adult in the household            | Very early childhood | 1.75         | <b>cg05491478</b> | <b>0.900</b>                | <b>0.903</b>              | <b>0.003</b>               | <b>0.002</b>                 | <b>0.008</b>    | <b>-0.0131; 0.0167</b> | <b>8.16E-01</b> | <b>9.24E-01</b>      |
|                                       | Early childhood      | 3.9          | <b>cg16907527</b> | <b>0.840</b>                | <b>0.848</b>              | <b>0.008</b>               | <b>0.006</b>                 | <b>0.006</b>    | <b>-0.0066; 0.0179</b> | <b>3.68E-01</b> | <b>7.10E-01</b>      |
|                                       |                      |              | <b>cg08818094</b> | <b>0.832</b>                | <b>0.834</b>              | <b>0.001</b>               | <b>-0.001</b>                | <b>0.011</b>    | <b>-0.0221; 0.0208</b> | <b>9.50E-01</b> | <b>9.86E-01</b>      |
|                                       |                      |              | <b>cg01060989</b> | <b>0.809</b>                | <b>0.814</b>              | <b>0.005</b>               | <b>0.005</b>                 | <b>0.007</b>    | <b>-0.0083; 0.0183</b> | <b>4.64E-01</b> | <b>7.61E-01</b>      |
|                                       |                      |              | <b>cg15814750</b> | <b>0.738</b>                | <b>0.755</b>              | <b>0.018</b>               | <b>0.016</b>                 | <b>0.008</b>    | <b>0.0006; 0.0324</b>  | <b>4.25E-02</b> | <b>3.95E-01</b>      |
|                                       |                      |              | <b>cg15783822</b> | <b>0.859</b>                | <b>0.858</b>              | <b>-0.001</b>              | <b>0.001</b>                 | <b>0.005</b>    | <b>-0.0098; 0.0114</b> | <b>8.77E-01</b> | <b>9.46E-01</b>      |
| <b>cg15864691</b>                     | <b>0.899</b>         | <b>0.903</b> | <b>0.004</b>      | <b>0.004</b>                | <b>0.005</b>              | <b>-0.0053; 0.0138</b>     | <b>3.81E-01</b>              | <b>7.10E-01</b> |                        |                 |                      |

|                |    |            |              |              |               |               |              |                        |                 |                 |
|----------------|----|------------|--------------|--------------|---------------|---------------|--------------|------------------------|-----------------|-----------------|
|                |    | cg02584161 | <b>0.650</b> | <b>0.654</b> | <b>0.004</b>  | <b>0.003</b>  | <b>0.014</b> | <b>-0.024; 0.0297</b>  | <b>8.34E-01</b> | <b>9.24E-01</b> |
|                |    | cg02810291 | <b>0.849</b> | <b>0.858</b> | <b>0.009</b>  | <b>0.010</b>  | <b>0.005</b> | <b>0.0008; 0.0195</b>  | <b>3.38E-02</b> | <b>3.95E-01</b> |
|                |    | cg04036644 | <b>0.889</b> | <b>0.889</b> | <b>0.001</b>  | <b>-0.002</b> | <b>0.006</b> | <b>-0.0137; 0.0096</b> | <b>7.31E-01</b> | <b>8.84E-01</b> |
|                |    | cg11811897 | <b>0.737</b> | <b>0.728</b> | <b>-0.010</b> | <b>-0.011</b> | <b>0.011</b> | <b>-0.0329; 0.0106</b> | <b>3.14E-01</b> | <b>7.10E-01</b> |
|                |    | cg15817130 | <b>0.787</b> | <b>0.782</b> | <b>-0.004</b> | <b>-0.006</b> | <b>0.007</b> | <b>-0.0207; 0.0087</b> | <b>4.23E-01</b> | <b>7.22E-01</b> |
|                |    | cg06711254 | <b>0.711</b> | <b>0.698</b> | <b>-0.013</b> | <b>-0.015</b> | <b>0.010</b> | <b>-0.0352; 0.0052</b> | <b>1.45E-01</b> | <b>5.39E-01</b> |
|                |    | cg19096460 | <b>0.843</b> | <b>0.841</b> | <b>-0.003</b> | <b>-0.003</b> | <b>0.006</b> | <b>-0.0146; 0.0087</b> | <b>6.16E-01</b> | <b>8.78E-01</b> |
|                |    | cg18980650 | 0.795        | 0.791        | -0.004        | 0.003         | 0.008        | -0.0121; 0.0175        | 7.21E-01        | 8.84E-01        |
|                |    | cg27504269 | 0.748        | 0.752        | 0.004         | 0.003         | 0.008        | -0.0133; 0.0189        | 7.33E-01        | 8.84E-01        |
| Late childhood | 10 | cg12096528 | <b>0.877</b> | <b>0.886</b> | <b>0.009</b>  | <b>0.009</b>  | <b>0.005</b> | <b>-0.0007; 0.0189</b> | <b>6.74E-02</b> | <b>3.95E-01</b> |
| Accumulation   |    | cg00807464 | <b>0.052</b> | <b>0.052</b> | <b>0.001</b>  | <b>0.000</b>  | <b>0.001</b> | <b>-0.0013; 0.0014</b> | <b>9.86E-01</b> | <b>9.86E-01</b> |
|                |    | cg10420609 | <b>0.555</b> | <b>0.559</b> | <b>0.004</b>  | <b>0.001</b>  | <b>0.002</b> | <b>-0.0035; 0.0063</b> | <b>5.81E-01</b> | <b>8.78E-01</b> |
|                |    | cg14579651 | <b>0.615</b> | <b>0.611</b> | <b>-0.004</b> | <b>-0.002</b> | <b>0.002</b> | <b>-0.0066; 0.0019</b> | <b>2.85E-01</b> | <b>7.10E-01</b> |

<sup>1</sup>DNAm unexp. = mean DNA methylation levels in individuals with no exposure to adversity from age 0 to 11.

<sup>2</sup>DNAm exp. SP = mean DNA methylation levels in individuals with exposure to adversity that occurred during the selected sensitive period (SP).

<sup>3</sup>ΔDNAm= difference in mean DNA methylation levels between individuals exposed to adversity during the selected sensitive period and individuals unexposed to adversity (i.e., DNAm exp. SP – DNAm unexp.)

<sup>4</sup>Effect estimates were calculated using linear regression of exposure to adversity from the theoretical model and DNA methylation, correcting for the covariates described in the methods.

\* SE = standard error; bolded loci passed a 5% FDR threshold in the original age 15 analysis.



**Table S11. Associations between adversity and DNA methylation at age 7 (whole blood) for loci identified at age 15.**

| Adversity                             | Timing               | Age (years)  | CpG               | DNAm unexposed <sup>1</sup> | DNAm exp. SP <sup>2</sup> | $\Delta$ DNAm <sup>3</sup> | Effect estimate <sup>4</sup> | SE*             | 95% CI                  | P-value         | FDR-adjusted p-value |
|---------------------------------------|----------------------|--------------|-------------------|-----------------------------|---------------------------|----------------------------|------------------------------|-----------------|-------------------------|-----------------|----------------------|
| Caregiver physical or emotional abuse | Early childhood      | 5            | cg14855874        | 0.089                       | 0.102                     | 0.013                      | 0.012                        | 0.006           | 0.0011; 0.0228          | 3.06E-02        | 2.51E-01             |
|                                       |                      |              | cg15454534        | 0.888                       | 0.889                     | 0.001                      | 0.001                        | 0.003           | -0.0043; 0.0069         | 6.51E-01        | 9.60E-01             |
|                                       |                      |              | cg06215562        | 0.839                       | 0.843                     | 0.004                      | 0.004                        | 0.005           | -0.006; 0.0132          | 4.58E-01        | 9.60E-01             |
| Sexual or physical abuse (by anyone)  | Early childhood      | 3.5          | <b>cg26970800</b> | <b>0.902</b>                | <b>0.887</b>              | <b>-0.015</b>              | <b>-0.015</b>                | <b>0.010</b>    | <b>-0.0336; 0.0042</b>  | <b>1.27E-01</b> | <b>6.51E-01</b>      |
|                                       |                      |              | <b>cg15723468</b> | <b>0.799</b>                | <b>0.807</b>              | <b>0.008</b>               | <b>0.006</b>                 | <b>0.009</b>    | <b>-0.0108; 0.0237</b>  | <b>4.63E-01</b> | <b>9.60E-01</b>      |
|                                       |                      |              | <b>cg17928317</b> | <b>0.695</b>                | <b>0.726</b>              | <b>0.031</b>               | <b>-0.002</b>                | <b>0.016</b>    | <b>-0.0326; 0.0285</b>  | <b>8.97E-01</b> | <b>9.60E-01</b>      |
|                                       | Late childhood       | 8            | cg27558057        | 0.248                       | 0.224                     | -0.024                     | 0.068                        | 0.021           | 0.0257; 0.1097          | 1.63E-03        | 6.67E-02             |
| Family instability                    | Very early childhood | 2.5          | cg02735620        | 0.877                       | 0.880                     | 0.002                      | 0.003                        | 0.004           | -0.0047; 0.0102         | 4.72E-01        | 9.60E-01             |
| Financial hardship                    | Very early childhood | 0.66         | cg14455319        | 0.266                       | 0.288                     | 0.021                      | 0.022                        | 0.009           | 0.0045; 0.0403          | 1.43E-02        | 2.27E-01             |
|                                       |                      |              | cg13204236        | 0.867                       | 0.868                     | 0.001                      | 0.002                        | 0.006           | -0.0103; 0.0143         | 7.44E-01        | 9.60E-01             |
|                                       | Early childhood      | 5            | cg15037420        | 0.795                       | 0.792                     | -0.003                     | -0.003                       | 0.007           | -0.0157; 0.0106         | 7.06E-01        | 9.60E-01             |
| cg06410970                            |                      |              | 0.870             | 0.868                       | -0.003                    | -0.002                     | 0.006                        | -0.0134; 0.0089 | 6.89E-01                | 9.60E-01        |                      |
|                                       | Late childhood       | 11           | cg02011706        | 0.860                       | 0.863                     | 0.003                      | 0.006                        | 0.012           | -0.018; 0.0308          | 6.05E-01        | 9.60E-01             |
|                                       |                      |              | cg04659536        | 0.906                       | 0.905                     | -0.001                     | -0.002                       | 0.005           | -0.0106; 0.0075         | 7.38E-01        | 9.60E-01             |
|                                       | Recency              |              | cg17670999        | 0.836                       | 0.836                     | 0.000                      | 0.000                        | 0.000           | -0.0004; 0.0009         | 4.15E-01        | 9.60E-01             |
|                                       |                      |              | cg25459301        | 0.791                       | 0.788                     | -0.002                     | 0.000                        | 0.000           | -0.0011; 0.0007         | 6.66E-01        | 9.60E-01             |
|                                       |                      |              | cg06812747        | 0.847                       | 0.843                     | -0.004                     | 0.000                        | 0.000           | -0.0009; 0.0008         | 8.49E-01        | 9.60E-01             |
| Maternal psychopathology              | Very early childhood | 2.75         | <b>cg16813552</b> | <b>0.890</b>                | <b>0.882</b>              | <b>-0.008</b>              | <b>-0.007</b>                | <b>0.003</b>    | <b>-0.0134; -0.0009</b> | <b>2.47E-02</b> | <b>2.51E-01</b>      |
| Neighborhood disadvantage             | Very early childhood | 2.75         | cg04288299        | 0.932                       | 0.935                     | 0.003                      | 0.006                        | 0.003           | -0.0006; 0.0121         | 7.41E-02        | 5.06E-01             |
|                                       |                      |              | cg25019631        | 0.194                       | 0.173                     | -0.021                     | -0.013                       | 0.009           | -0.0296; 0.0044         | 1.46E-01        | 6.66E-01             |
|                                       |                      |              | cg04224851        | 0.903                       | 0.915                     | 0.012                      | 0.006                        | 0.003           | 0.0011; 0.0114          | 1.66E-02        | 2.27E-01             |
| One adult in the household            | Very early childhood | 1.75         | <b>cg05491478</b> | <b>0.915</b>                | <b>0.920</b>              | <b>0.006</b>               | <b>0.005</b>                 | <b>0.005</b>    | <b>-0.0046; 0.0151</b>  | <b>2.94E-01</b> | <b>9.60E-01</b>      |
|                                       | Early childhood      | 3.9          | <b>cg16907527</b> | <b>0.844</b>                | <b>0.845</b>              | <b>0.001</b>               | <b>0.001</b>                 | <b>0.005</b>    | <b>-0.0083; 0.011</b>   | <b>7.86E-01</b> | <b>9.60E-01</b>      |
|                                       |                      |              | <b>cg08818094</b> | <b>0.858</b>                | <b>0.851</b>              | <b>-0.007</b>              | <b>-0.005</b>                | <b>0.007</b>    | <b>-0.0191; 0.0088</b>  | <b>4.68E-01</b> | <b>9.60E-01</b>      |
|                                       |                      |              | <b>cg01060989</b> | <b>0.834</b>                | <b>0.835</b>              | <b>0.001</b>               | <b>0.001</b>                 | <b>0.006</b>    | <b>-0.0105; 0.0118</b>  | <b>9.13E-01</b> | <b>9.60E-01</b>      |
|                                       |                      |              | <b>cg15814750</b> | <b>0.752</b>                | <b>0.747</b>              | <b>-0.006</b>              | <b>-0.005</b>                | <b>0.008</b>    | <b>-0.0207; 0.0098</b>  | <b>4.81E-01</b> | <b>9.60E-01</b>      |
|                                       |                      |              | <b>cg15783822</b> | <b>0.878</b>                | <b>0.880</b>              | <b>0.002</b>               | <b>0.002</b>                 | <b>0.004</b>    | <b>-0.0054; 0.0101</b>  | <b>5.46E-01</b> | <b>9.60E-01</b>      |
| <b>cg15864691</b>                     | <b>0.911</b>         | <b>0.913</b> | <b>0.002</b>      | <b>0.002</b>                | <b>0.003</b>              | <b>-0.0035; 0.0085</b>     | <b>4.11E-01</b>              | <b>9.60E-01</b> |                         |                 |                      |

|                |    |            |              |              |               |               |              |                        |                 |                 |
|----------------|----|------------|--------------|--------------|---------------|---------------|--------------|------------------------|-----------------|-----------------|
|                |    | cg02584161 | <b>0.688</b> | <b>0.690</b> | <b>0.002</b>  | <b>0.000</b>  | <b>0.013</b> | <b>-0.025; 0.0254</b>  | <b>9.88E-01</b> | <b>9.88E-01</b> |
|                |    | cg02810291 | <b>0.833</b> | <b>0.836</b> | <b>0.003</b>  | <b>0.003</b>  | <b>0.005</b> | <b>-0.0071; 0.0131</b> | <b>5.66E-01</b> | <b>9.60E-01</b> |
|                |    | cg04036644 | <b>0.903</b> | <b>0.903</b> | <b>0.000</b>  | <b>-0.001</b> | <b>0.005</b> | <b>-0.0096; 0.0085</b> | <b>8.99E-01</b> | <b>9.60E-01</b> |
|                |    | cg11811897 | <b>0.778</b> | <b>0.772</b> | <b>-0.006</b> | <b>-0.008</b> | <b>0.009</b> | <b>-0.0256; 0.0089</b> | <b>3.43E-01</b> | <b>9.60E-01</b> |
|                |    | cg15817130 | <b>0.822</b> | <b>0.824</b> | <b>0.002</b>  | <b>0.000</b>  | <b>0.006</b> | <b>-0.0123; 0.013</b>  | <b>9.57E-01</b> | <b>9.80E-01</b> |
|                |    | cg06711254 | <b>0.713</b> | <b>0.704</b> | <b>-0.008</b> | <b>-0.009</b> | <b>0.011</b> | <b>-0.0316; 0.0134</b> | <b>4.27E-01</b> | <b>9.60E-01</b> |
|                |    | cg19096460 | <b>0.853</b> | <b>0.850</b> | <b>-0.003</b> | <b>-0.002</b> | <b>0.005</b> | <b>-0.0112; 0.0065</b> | <b>6.05E-01</b> | <b>9.60E-01</b> |
|                |    | cg18980650 | 0.795        | 0.788        | -0.007        | -0.002        | 0.007        | -0.0154; 0.0113        | 7.62E-01        | 9.60E-01        |
|                |    | cg27504269 | 0.783        | 0.781        | -0.001        | -0.001        | 0.008        | -0.0163; 0.0141        | 8.90E-01        | 9.60E-01        |
| Late childhood | 10 | cg12096528 | <b>0.885</b> | <b>0.886</b> | <b>0.001</b>  | <b>0.002</b>  | <b>0.004</b> | <b>-0.0065; 0.0098</b> | <b>6.85E-01</b> | <b>9.60E-01</b> |
| Accumulation   |    | cg00807464 | <b>0.050</b> | <b>0.051</b> | <b>0.001</b>  | <b>0.001</b>  | <b>0.001</b> | <b>-0.0002; 0.0018</b> | <b>1.12E-01</b> | <b>6.51E-01</b> |
|                |    | cg10420609 | <b>0.603</b> | <b>0.602</b> | <b>-0.001</b> | <b>0.001</b>  | <b>0.003</b> | <b>-0.0047; 0.0058</b> | <b>8.34E-01</b> | <b>9.60E-01</b> |
|                |    | cg14579651 | <b>0.663</b> | <b>0.653</b> | <b>-0.010</b> | <b>-0.003</b> | <b>0.003</b> | <b>-0.0083; 0.0018</b> | <b>2.03E-01</b> | <b>8.30E-01</b> |

<sup>1</sup>DNAm unexp. = mean DNA methylation levels at age 7 in individuals with no exposure to adversity from age 0 to 11.

<sup>2</sup>DNAm exp. SP = mean DNA methylation levels at age 7 in individuals with exposure to adversity that occurred during the selected sensitive period (SP).

<sup>3</sup>ΔDNAm= difference in mean DNA methylation levels between individuals exposed to adversity during the selected sensitive period and individuals unexposed to adversity (i.e., DNAm exp. SP – DNAm unexp.)

<sup>4</sup>Effect estimates were calculated using linear regression of exposure to adversity from the theoretical model and DNA methylation, correcting for the covariates described in the methods.

\* SE = standard error; bolded loci passed a 5% FDR threshold in the original age 15 analysis.

**Table S12. Types of longitudinal DNAm trajectories in response to childhood adversity for top adolescent loci.**

| Adversity                             | Timing                  | Age (years) | CpG               | Trajectory name         |
|---------------------------------------|-------------------------|-------------|-------------------|-------------------------|
| Caregiver physical or emotional abuse | Early childhood         | 5           | cg14855874        | Emergent                |
|                                       |                         |             | cg15454534        | Latent                  |
|                                       |                         |             | cg06215562        | Latent                  |
| Sexual or physical abuse (by anyone)  | Early childhood         | 3.5         | <b>cg26970800</b> | <b>Emergent</b>         |
|                                       |                         |             | <b>cg15723468</b> | <b>Latent</b>           |
|                                       |                         |             | <b>cg17928317</b> | <b>Primed</b>           |
|                                       | Late childhood          | 8           | cg27558057        | <b>Stable</b>           |
| Family instability                    | Very early childhood    | 2.5         | cg02735620        | Emergent                |
| Financial hardship                    | Very early childhood    | 0.66        | cg14455319        | Time-stable             |
|                                       |                         |             | cg13204236        | Latent                  |
|                                       | Early childhood         | 5           | cg15037420        | Latent                  |
|                                       |                         |             | cg06410970        | Overcompensation        |
|                                       | Late childhood          | 11          | cg02011706        | Emergent                |
|                                       |                         |             | cg04659536        | Latent                  |
|                                       | Recency                 |             | cg17670999        | Stable                  |
| cg25459301                            |                         |             | Overcompensation  |                         |
| cg06812747                            | Stable                  |             |                   |                         |
| Maternal psychopathology              | Very early childhood    | 2.75        | <b>cg16813552</b> | <b>Stable</b>           |
| Neighborhood disadvantage             | Very early childhood    | 2.75        | cg04288299        | Overcompensation        |
|                                       |                         |             | cg25019631        | Overcompensation        |
|                                       |                         |             | cg04224851        | Overcompensation        |
| One adult in the household            | Very early childhood    | 1.75        | <b>cg05491478</b> | <b>Overcompensation</b> |
|                                       |                         |             |                   |                         |
|                                       | Early childhood         | 3.9         | <b>cg16907527</b> | <b>Flat emergent</b>    |
|                                       |                         |             | <b>cg08818094</b> | <b>Latent</b>           |
|                                       |                         |             | <b>cg01060989</b> | <b>Latent</b>           |
|                                       |                         |             | <b>cg15814750</b> | <b>Latent</b>           |
|                                       |                         |             | <b>cg15783822</b> | <b>Latent</b>           |
|                                       |                         |             | <b>cg15864691</b> | <b>Overcompensation</b> |
|                                       |                         |             | <b>cg02584161</b> | <b>Latent</b>           |
| <b>cg02810291</b>                     | <b>Overcompensation</b> |             |                   |                         |

|                |    |                   |                         |
|----------------|----|-------------------|-------------------------|
|                |    | <b>cg04036644</b> | <b>Latent</b>           |
|                |    | <b>cg11811897</b> | <b>Latent</b>           |
|                |    | <b>cg15817130</b> | <b>Latent</b>           |
|                |    | <b>cg06711254</b> | <b>Flat emergent</b>    |
|                |    | <b>cg19096460</b> | <b>Latent</b>           |
|                |    | cg18980650        | Emergent                |
|                |    | cg27504269        | Latent                  |
| Late childhood | 10 | <b>cg12096528</b> | <b>Overcompensation</b> |
| Accumulation   |    | <b>cg00807464</b> | <b>Stable</b>           |
|                |    | <b>cg10420609</b> | <b>Latent</b>           |
|                |    | <b>cg14579651</b> | <b>Stable</b>           |

\*Bolded loci passed a 5% FDR threshold in the original analysis.

**Table S13. Persistence of differential DNA methylation patterns identified at age 7 (whole blood) into adolescence (age 15).**

| Adversity                             | Timing               | Age (years) | CpG        | DNAm unexposed <sup>1</sup> | DNAm exp. SP <sup>2</sup> | $\Delta$ DNAm <sup>3</sup> | Effect estimate <sup>4</sup> | SE*      | 95% CI          | P-value  | FDR-adjusted p-value |
|---------------------------------------|----------------------|-------------|------------|-----------------------------|---------------------------|----------------------------|------------------------------|----------|-----------------|----------|----------------------|
| Caregiver physical or emotional abuse | Middle childhood     | 6           | cg12023170 | 0.098                       | 0.105                     | 0.008                      | 0.006                        | 0.007    | -0.0077; 0.0191 | 4.02E-01 | 8.56E-01             |
| Sexual or physical abuse (by anyone)  | Early childhood      | 4.75        | cg20369299 | 0.682                       | 0.662                     | -0.02                      | -0.016                       | 0.018    | -0.0523; 0.0196 | 3.72E-01 | 8.56E-01             |
|                                       |                      |             | cg13817046 | 0.425                       | 0.424                     | -0.001                     | 0.001                        | 0.014    | -0.0257; 0.0285 | 9.18E-01 | 9.61E-01             |
| Family instability                    | Very early childhood | 2.5         | cg04079399 | 0.885                       | 0.883                     | -0.002                     | -0.002                       | 0.004    | -0.0112; 0.0063 | 5.90E-01 | 8.75E-01             |
|                                       | Early childhood      | 4.75        | cg01407460 | 0.023                       | 0.024                     | 0.000                      | 0.001                        | 0.001    | -0.0009; 0.002  | 4.22E-01 | 8.56E-01             |
|                                       |                      |             | cg17134302 | 0.835                       | 0.836                     | 0.001                      | 0.001                        | 0.006    | -0.0099; 0.0118 | 8.63E-01 | 9.61E-01             |
|                                       |                      |             | cg13706680 | 0.875                       | 0.883                     | 0.008                      | 0.008                        | 0.005    | -0.0005; 0.0173 | 6.30E-02 | 7.16E-01             |
|                                       |                      |             | cg27457457 | 0.664                       | 0.646                     | -0.017                     | -0.015                       | 0.016    | -0.0469; 0.0176 | 3.74E-01 | 8.56E-01             |
|                                       |                      |             | cg01504589 | 0.836                       | 0.828                     | -0.008                     | -0.007                       | 0.009    | -0.0247; 0.0105 | 4.28E-01 | 8.56E-01             |
|                                       |                      |             | cg13876553 | 0.801                       | 0.805                     | 0.004                      | 0.006                        | 0.009    | -0.0128; 0.0243 | 5.43E-01 | 8.75E-01             |
|                                       |                      |             | cg01841772 | 0.810                       | 0.825                     | 0.014                      | 0.014                        | 0.009    | -0.0028; 0.0315 | 1.02E-01 | 7.16E-01             |
|                                       |                      |             | cg16231917 | 0.214                       | 0.242                     | 0.028                      | 0.025                        | 0.015    | -0.0037; 0.0542 | 8.66E-02 | 7.16E-01             |
|                                       |                      |             | cg26997966 | 0.860                       | 0.854                     | -0.006                     | -0.007                       | 0.005    | -0.0174; 0.0041 | 2.24E-01 | 8.56E-01             |
|                                       |                      |             | cg14401897 | 0.799                       | 0.808                     | 0.009                      | 0.010                        | 0.010    | -0.0103; 0.0299 | 3.37E-01 | 8.56E-01             |
|                                       |                      |             | cg27639644 | 0.854                       | 0.851                     | -0.003                     | -0.003                       | 0.006    | -0.0151; 0.0098 | 6.78E-01 | 8.75E-01             |
|                                       |                      |             | cg02886132 | 0.878                       | 0.885                     | 0.007                      | 0.007                        | 0.004    | -0.0012; 0.0162 | 9.28E-02 | 7.16E-01             |
|                                       |                      |             | cg27061903 | 0.051                       | 0.054                     | 0.003                      | 0.003                        | 0.003    | -0.0025; 0.0085 | 2.84E-01 | 8.56E-01             |
|                                       |                      |             | cg10571837 | 0.897                       | 0.903                     | 0.006                      | 0.006                        | 0.004    | -0.0014; 0.0129 | 1.15E-01 | 7.16E-01             |
|                                       |                      |             | cg12188526 | 0.883                       | 0.885                     | 0.001                      | 0.002                        | 0.004    | -0.007; 0.0104  | 6.95E-01 | 8.75E-01             |
| cg21172807                            | 0.109                | 0.124       | 0.014      | 0.014                       | 0.005                     | 0.0033; 0.0245             | 9.90E-03                     | 4.55E-01 |                 |          |                      |
| cg01267076                            | 0.846                | 0.847       | 0.002      | 0.003                       | 0.007                     | -0.01; 0.0164              | 6.36E-01                     | 8.75E-01 |                 |          |                      |
| cg22346081                            | 0.858                | 0.860       | 0.002      | 0.002                       | 0.005                     | -0.0073; 0.0119            | 6.40E-01                     | 8.75E-01 |                 |          |                      |
| cg16338178                            | 0.825                | 0.821       | -0.004     | -0.003                      | 0.007                     | -0.0174; 0.0113            | 6.75E-01                     | 8.75E-01 |                 |          |                      |
| cg08971940                            | 0.772                | 0.785       | 0.013      | 0.014                       | 0.011                     | -0.0074; 0.0357            | 1.97E-01                     | 8.56E-01 |                 |          |                      |
| cg14948379                            | 0.851                | 0.848       | -0.003     | -0.003                      | 0.007                     | -0.0159; 0.0103            | 6.79E-01                     | 8.75E-01 |                 |          |                      |
| cg01654242                            | 0.810                | 0.817       | 0.007      | 0.007                       | 0.010                     | -0.013; 0.0272             | 4.88E-01                     | 8.75E-01 |                 |          |                      |

|                  |      |            |       |       |        |        |       |                 |          |          |
|------------------|------|------------|-------|-------|--------|--------|-------|-----------------|----------|----------|
|                  |      | cg11438065 | 0.901 | 0.902 | 0.002  | 0.002  | 0.004 | -0.0053; 0.0089 | 6.12E-01 | 8.75E-01 |
|                  |      | cg22011436 | 0.840 | 0.846 | 0.006  | 0.007  | 0.008 | -0.0085; 0.0225 | 3.75E-01 | 8.56E-01 |
|                  |      | cg01587190 | 0.058 | 0.061 | 0.003  | 0.003  | 0.002 | -0.0003; 0.0072 | 7.05E-02 | 7.16E-01 |
|                  |      | cg01023798 | 0.854 | 0.853 | -0.002 | 0.000  | 0.006 | -0.0123; 0.0122 | 9.92E-01 | 9.92E-01 |
|                  |      | cg09305491 | 0.910 | 0.909 | -0.001 | -0.001 | 0.004 | -0.008; 0.006   | 7.80E-01 | 9.38E-01 |
|                  |      | cg22060367 | 0.880 | 0.880 | 0.000  | 0.000  | 0.005 | -0.0084; 0.0093 | 9.20E-01 | 9.61E-01 |
|                  |      | cg05353659 | 0.892 | 0.888 | -0.004 | -0.004 | 0.004 | -0.0118; 0.0041 | 3.41E-01 | 8.56E-01 |
|                  |      | cg27567416 | 0.882 | 0.887 | 0.005  | 0.006  | 0.004 | -0.002; 0.014   | 1.42E-01 | 7.24E-01 |
|                  |      | cg07206497 | 0.876 | 0.876 | 0.001  | 0.002  | 0.005 | -0.0072; 0.0106 | 7.04E-01 | 8.75E-01 |
|                  |      | cg05886789 | 0.839 | 0.841 | 0.002  | 0.003  | 0.006 | -0.0086; 0.0155 | 5.77E-01 | 8.75E-01 |
|                  |      | cg14637285 | 0.858 | 0.851 | -0.007 | -0.007 | 0.006 | -0.0185; 0.0043 | 2.23E-01 | 8.56E-01 |
|                  |      | cg00967695 | 0.883 | 0.875 | -0.008 | -0.008 | 0.007 | -0.0225; 0.0061 | 2.62E-01 | 8.56E-01 |
|                  |      | cg01100868 | 0.892 | 0.894 | 0.002  | 0.003  | 0.004 | -0.0056; 0.0111 | 5.20E-01 | 8.75E-01 |
|                  |      | cg23184756 | 0.834 | 0.835 | 0.001  | 0.000  | 0.006 | -0.0121; 0.0131 | 9.41E-01 | 9.61E-01 |
|                  |      | cg00943585 | 0.828 | 0.824 | -0.005 | -0.003 | 0.011 | -0.0246; 0.0194 | 8.16E-01 | 9.38E-01 |
|                  | 5.75 | cg17719337 | 0.040 | 0.040 | 0.000  | 0.000  | 0.002 | -0.0031; 0.0033 | 9.39E-01 | 9.61E-01 |
|                  |      | cg26848593 | 0.027 | 0.028 | 0.001  | 0.000  | 0.001 | -0.0015; 0.0025 | 6.23E-01 | 8.75E-01 |
|                  |      | cg06770536 | 0.733 | 0.718 | -0.015 | -0.018 | 0.012 | -0.042; 0.0051  | 1.24E-01 | 7.16E-01 |
| Middle Childhood | 6.75 | cg19569074 | 0.677 | 0.668 | -0.009 | -0.004 | 0.016 | -0.0356; 0.0274 | 7.98E-01 | 9.38E-01 |
|                  |      | cg10940545 | 0.807 | 0.796 | -0.011 | -0.015 | 0.015 | -0.0443; 0.0143 | 3.14E-01 | 8.56E-01 |

<sup>1</sup>DNAm unexp. = mean DNA methylation levels at age 15 in individuals with no exposure to adversity from age 0 to 11.

<sup>2</sup>DNAm exp. SP = mean DNA methylation levels at age 15 in individuals with exposure to adversity that occurred during the selected sensitive period (SP).

<sup>3</sup> $\Delta$ DNAm = difference in mean DNA methylation levels between individuals exposed to adversity during the selected sensitive period and individuals unexposed to adversity (i.e., DNAm exp. SP – DNAm unexp.)

<sup>4</sup>Effect estimates were calculated using linear regression of exposure to adversity during the selected sensitive period from the theoretical model and DNA methylation, correcting for the covariates described in the methods.

\* SE = standard error.

## SUPPLEMENTAL FIGURES

Figure S1. Flow-chart of analyses

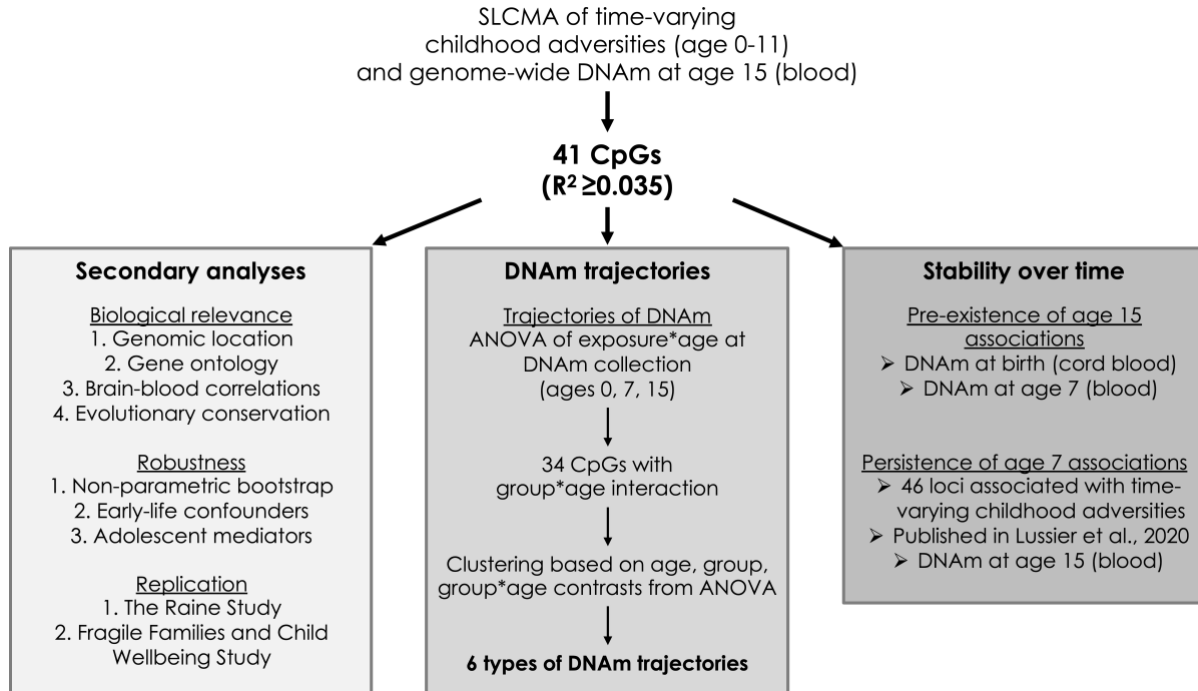

Summary of primary and secondary analyses included in the present manuscript.

Figure S2. Directed acyclic graphs (DAGs) of primary and sensitivity analyses

**A. Primary analyses**

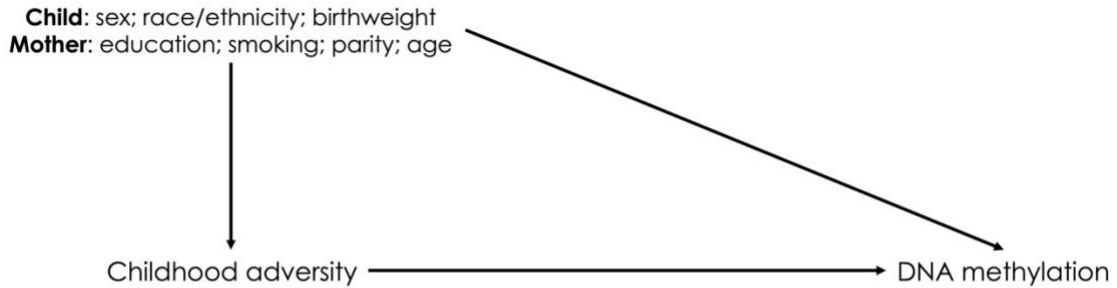

**B. Sensitivity analyses of early-life confounders**

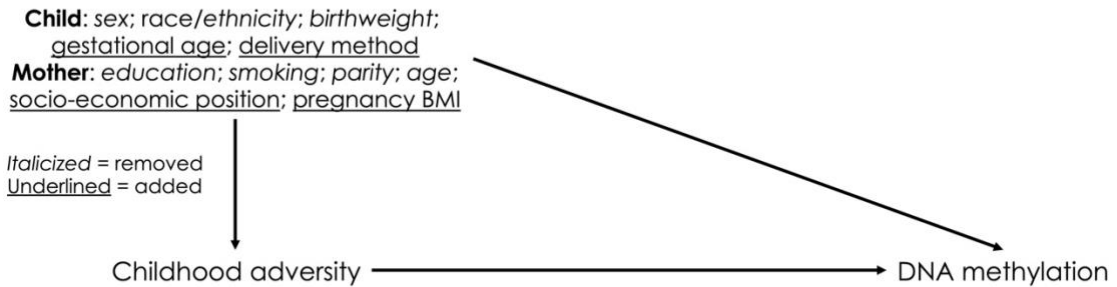

**C. Sensitivity analyses of adolescent mediators**

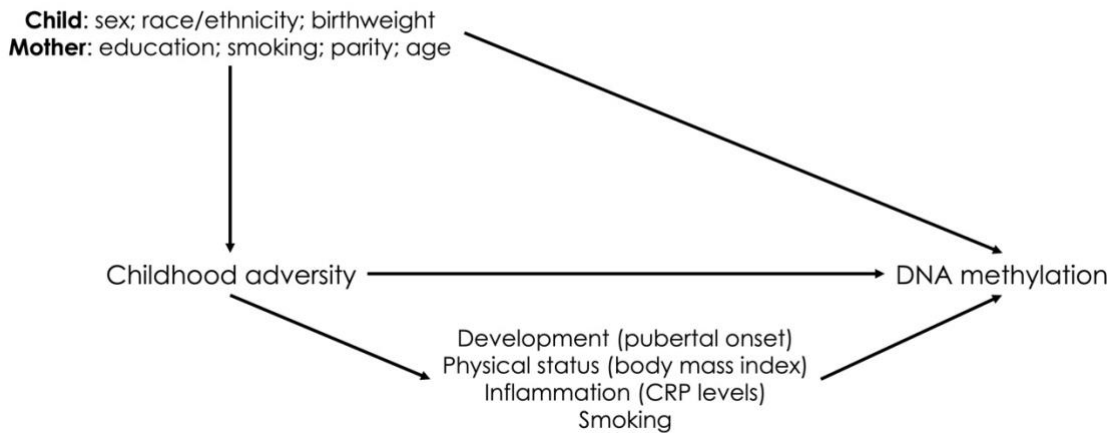

- A)** Confounders were selected based on prior analyses in the ALSPAC cohorts, which have shown that these child- and mother-based factors are confounders of the relationship between childhood adversity and DNAm.
- B)** In our sensitivity analyses of early-life confounders, we assessed the impact of removing (*italics*) or adding (underlined) confounders to our primary model in A. These confounders were added/removed individually.
- C)** In our sensitivity analyses of adolescent mediators, we investigated mediation through factors related to adolescent development and behaviors, each assessed individually in our primary model.



**Figure S3. Quantile-Quantile plots of the epigenome-wide analyses**

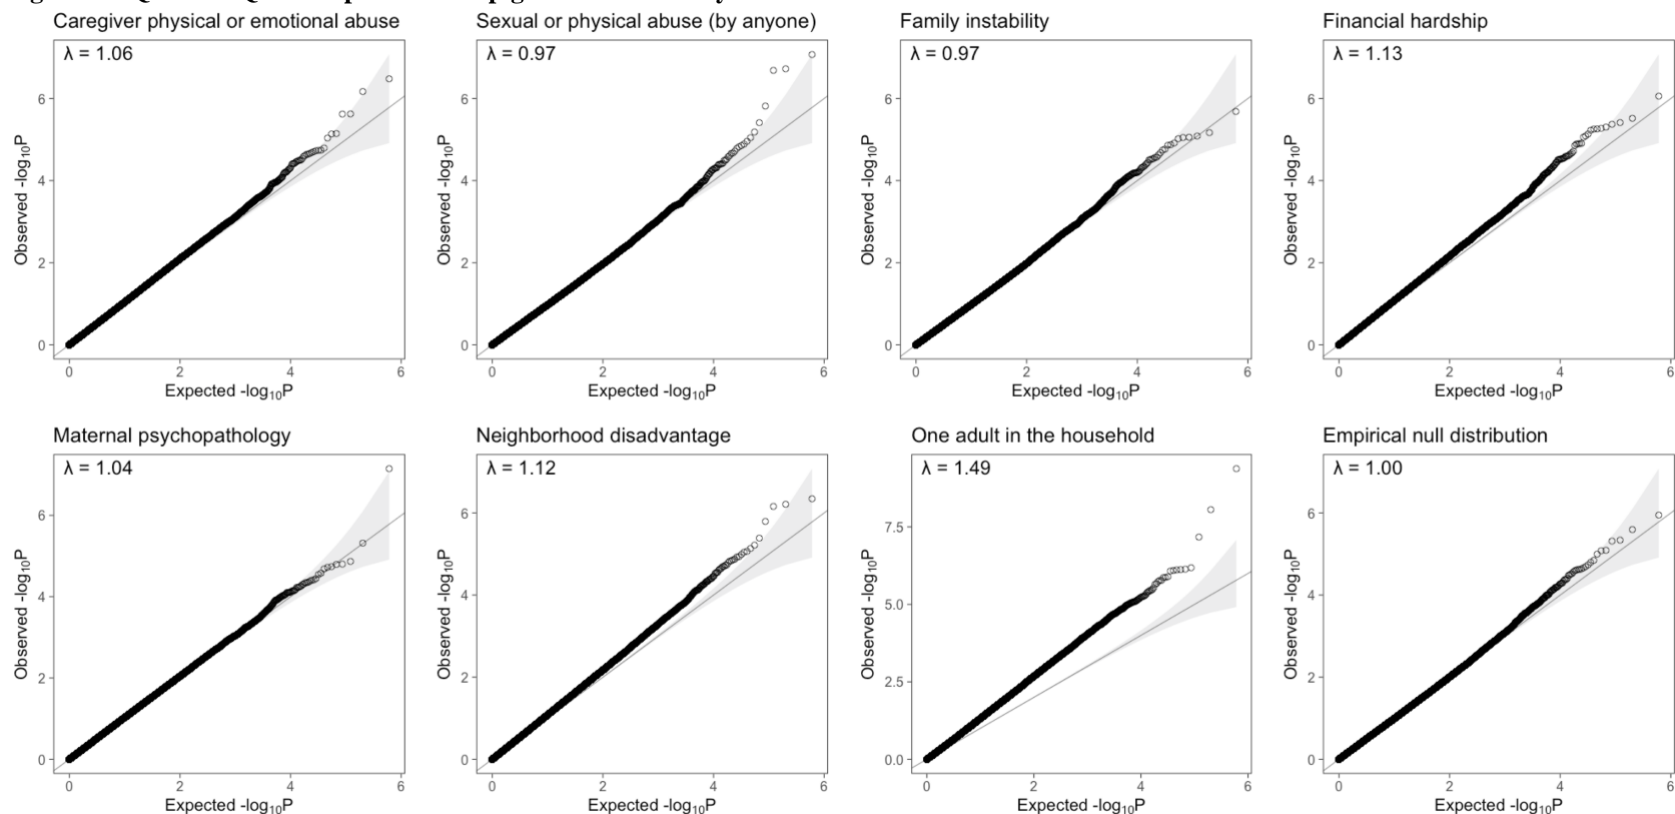

Quantile-quantile (QQ) plots of the expected versus observed p-value distributions for the 302,581 CpGs analyzed for each adversity. The genomic inflation factor ( $\lambda$ ) is shown for each adversity and ranged from 0.97 to 1.49, with the one-adult household analysis showing the most inflation (1.49). To determine whether the inflation observed in some of these analyses was due to issues with the method of statistical inference or the assumptions upon which the model relies, we also show a QQ plot of an empirical null distribution, generated using scrambled one-adult household exposure data from ALSPAC with the same covariates as the other analyses. We did not observe any inflation in this model, suggesting that inflation was not due to inference, but instead may represent stronger associations between the exposures and DNAm, which are further amplified due to the non-independence of CpGs (i.e., correlations across the epigenome).

**Figure S4. Summary of prevalence and correlations between adversities from age 0-11.**

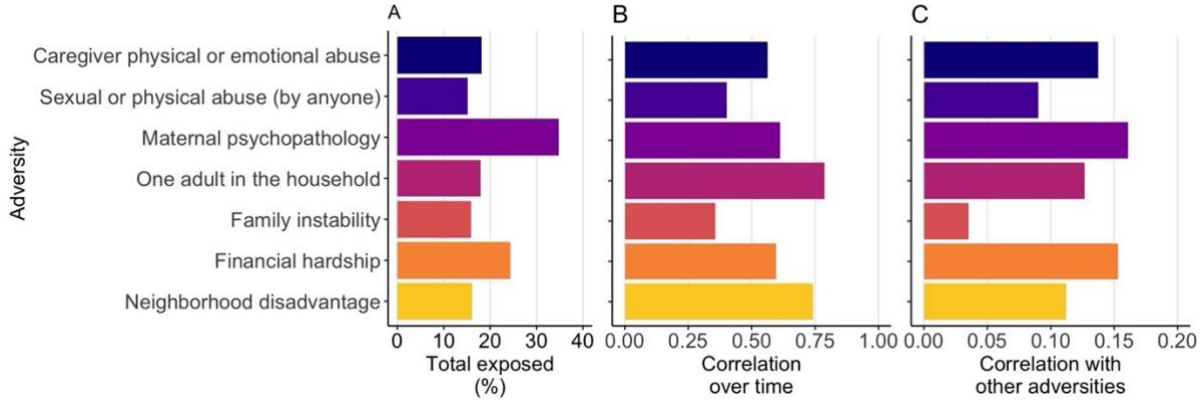

**A)** The prevalence of each adversity from age 0-11 varied by type, ranging from 15.1% (sexual or physical abuse by anyone) to 34.8% (maternal psychopathology).

**B)** Exposures within each type of adversity were generally correlated over time, ranging from 0.357 (family instability) to 0.786 (one adult in the household). Closer timepoints tended to be more related than more distant timepoints.

**C)** On average, the absolute correlation of exposures to different adversities was modest, ranging from -0.035 (family instability; shown here on absolute scale) to 0.161 (maternal psychopathology), which may reflect various dimensions of childhood adversity.

Correlations were assessed using tetrachoric correlations.

Figure S5. Genomic locations of top age 15 loci compared to all sites tested (n=302,581).

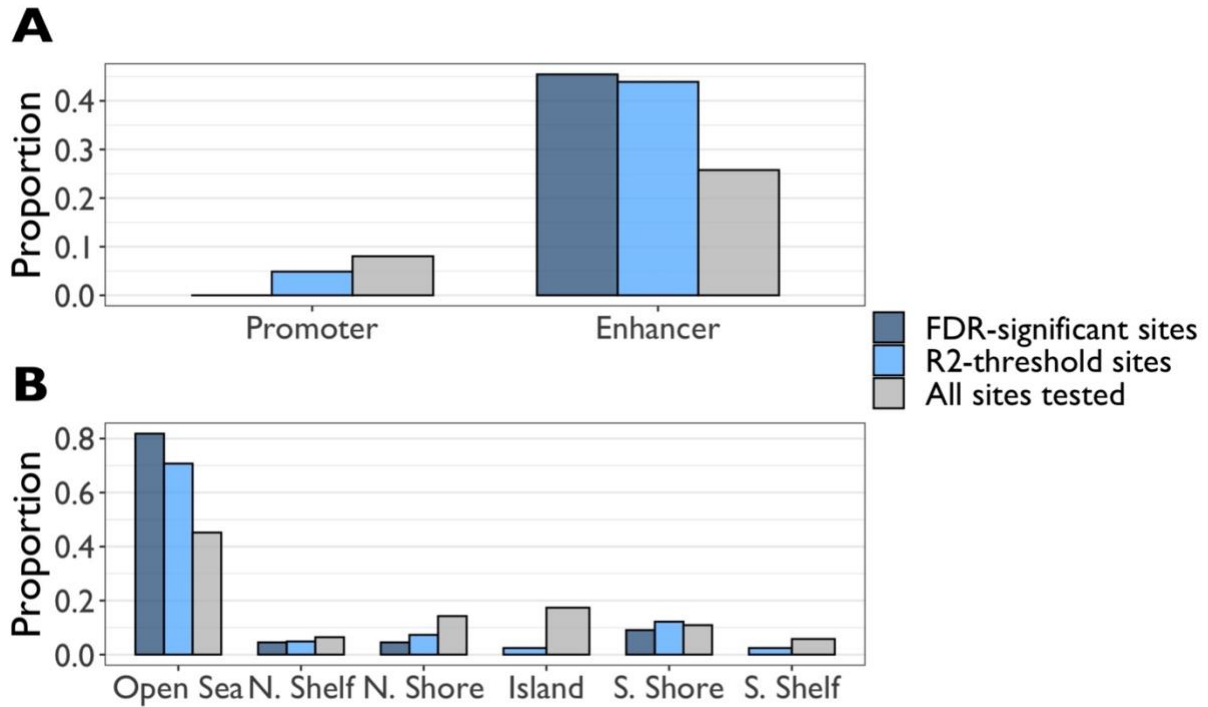

**A)** Compared to all tested sites, FDR-significant loci showed more enrichment in enhancer regions ( $\chi^2=4.5$ ;  $p=0.034$ ) and no presence in promoter regions ( $\chi^2=1.9$ ;  $p=0.17$ ). R<sup>2</sup>-threshold loci also showed higher enrichment in enhancers ( $\chi^2=7.1$ ;  $p=0.0079$ ) and no differences in promoter enrichment ( $\chi^2=0.55$ ;  $p=0.46$ ).

**B)** FDR-significant loci also differed in terms of their location relation to CpG islands, showing higher enrichment in Open Sea regions and decreased enrichment in CpG islands compared to all sites ( $\chi^2=13.3$ ;  $p=0.021$ ). R<sup>2</sup>-threshold loci also higher enrichment in Open Sea regions and decreased enrichment in CpG islands compared to all sites ( $\chi^2=13.6$ ;  $p=0.018$ ).

**Figure S6. Brain-blood correlations for top loci identified at age 15.**

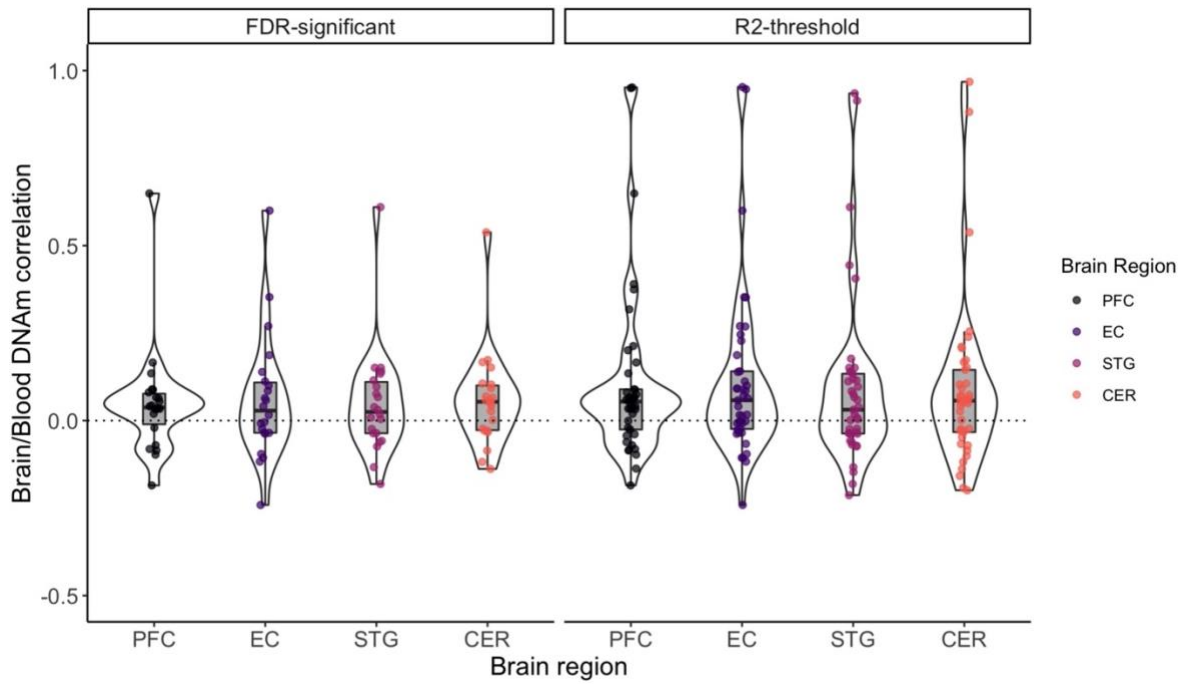

Correlations between DNA methylation measured in blood and specific brain regions are shown for the 22 FDR-significant loci identified at age 15, as well as the 41 loci that passed an  $R^2$  threshold of 0.035. Data were obtained from Hannon et al., 2015. PFC = prefrontal cortex; EC = entorhinal cortex; STG = superior temporal gyrus; CER = cerebellum.

**Figure S7. Enrichment of Gene Ontology (GO) term clusters for top loci at age 15 using DAVID.**

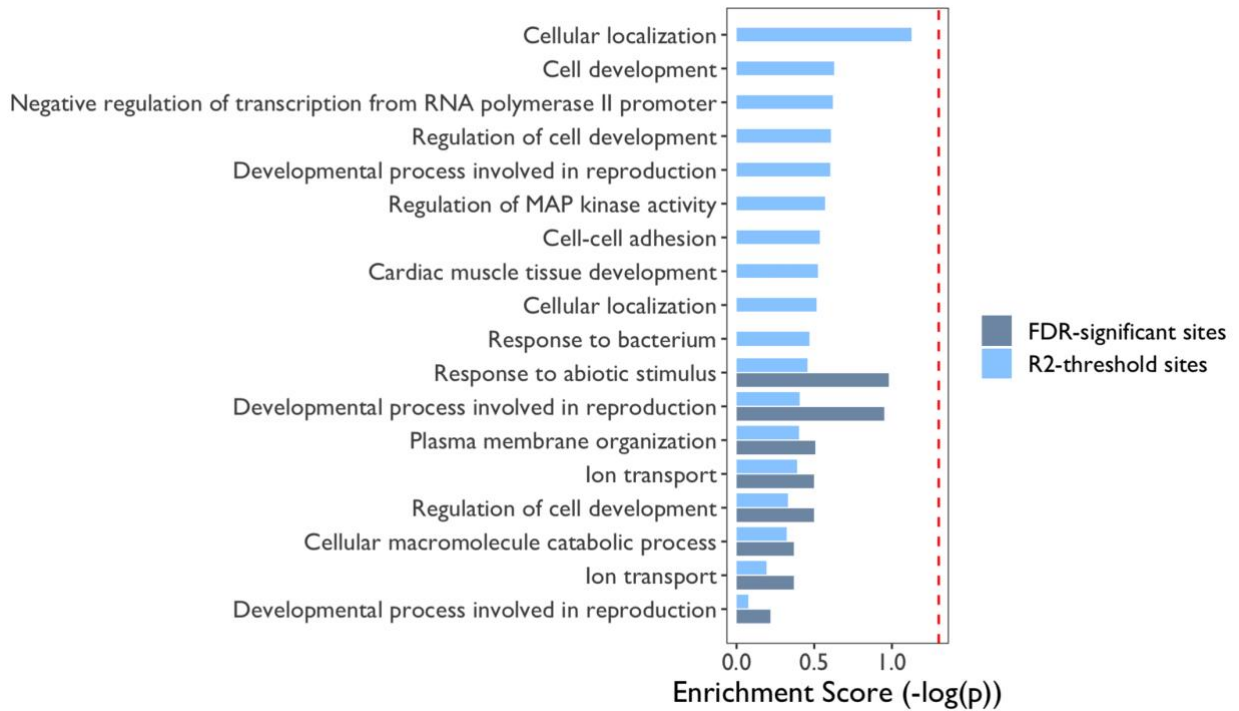

The 22 FDR-significant loci were annotated to 21 unique genes, while the 41 R<sup>2</sup>-threshold loci were annotated to 39 genes. The plot shows the clusters of GO biological processes that emerged from these genes, as analyzed using DAVID (4,5). No clusters were significant at  $p < 0.05$ , shown here as the dotted red line corresponding to an enrichment score of 1.3.

**Figure S8. Enrichment of Gene Ontology (GO) term for top loci at age 15 using missMethyl.**

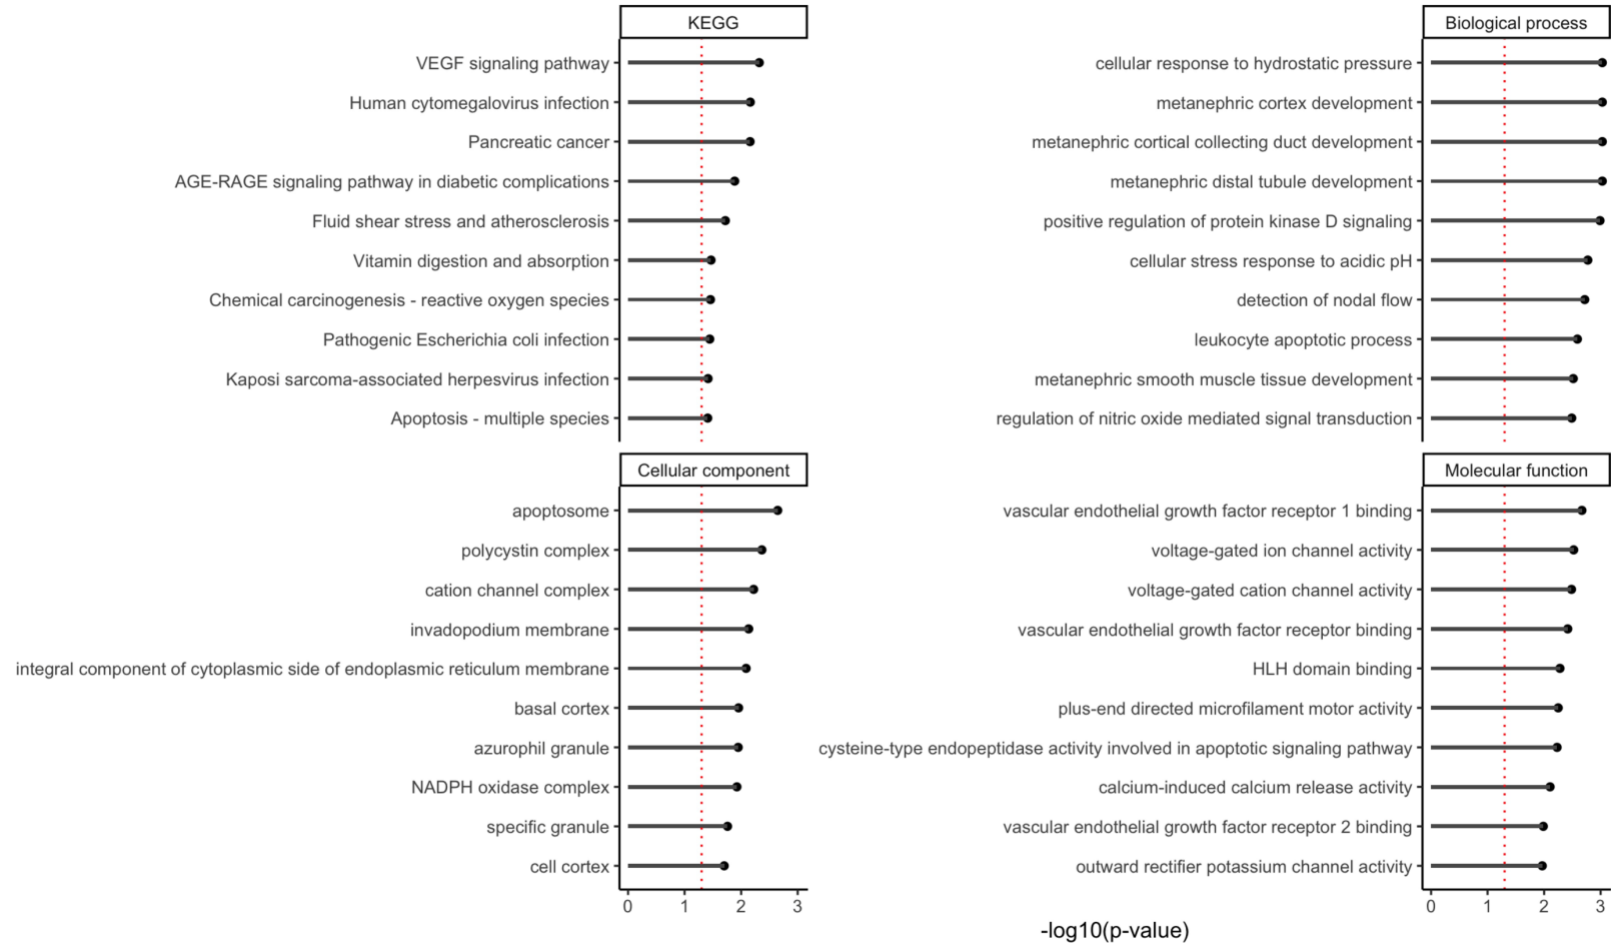

Gene ontology enrichment was completed using the *missMethyl* package on the 41 loci that passed an  $R^2 \geq 0.035$ . The approach accounts for the total number of CpGs measured in each gene from the 302,581 CpGs analyzed. No clusters were significant at  $FDR < 0.05$ , shown here as the dotted red line corresponding to an  $-\log_{10}(0.05)$ . The top 10 processes from KEGG, biological processes, cellular component, and molecular function categories are shown. Top pathways and processes were related to immune function, apoptosis, and development.

**Figure S9. Genes annotated to top age 15 loci were no more highly constrained than all sites.**

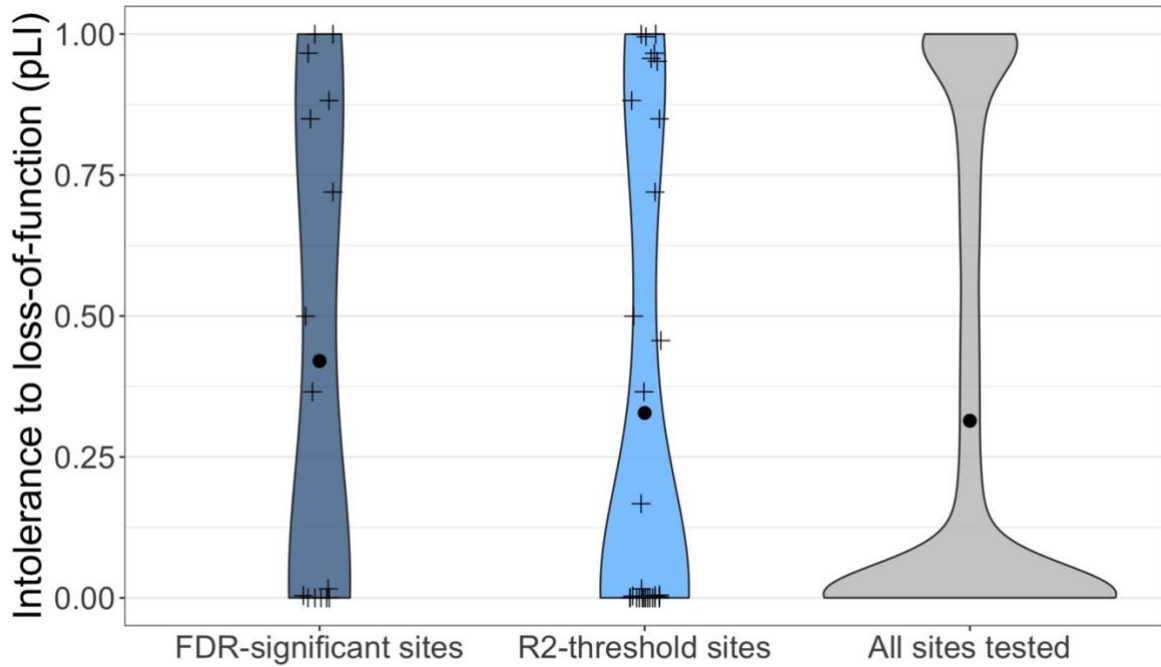

Violin plots show the distribution of gene constraint scores (pLI) for FDR-significant (n=17 annotated genes from 22 loci), R<sup>2</sup>-threshold loci (n=33 annotated genes from 41 loci), and genome-wide loci (n=16,114), where higher values represent increased probability of a gene being intolerant to Loss-of-Function variation. Genes annotated to FDR-significant sites were no more highly constrained than the rest of genes tested (permutation p=0.27 for FDR-significant subset; p=0.51 for R<sup>2</sup>-threshold subset). Black points represent mean pLI values for the two sets of genes. Three genes in the set of FDR-significant loci showed a pLI>0.9 (*DSP*, *CUX2*, and *STK38L*), with four more in the R<sup>2</sup>-threshold subset (*FBXL16*, *PKD2*, *TAF1*, and *XKR6*).

**Figure S10. Non-parametric bootstrapping of associations between childhood adversity and DNAm at age 15.**

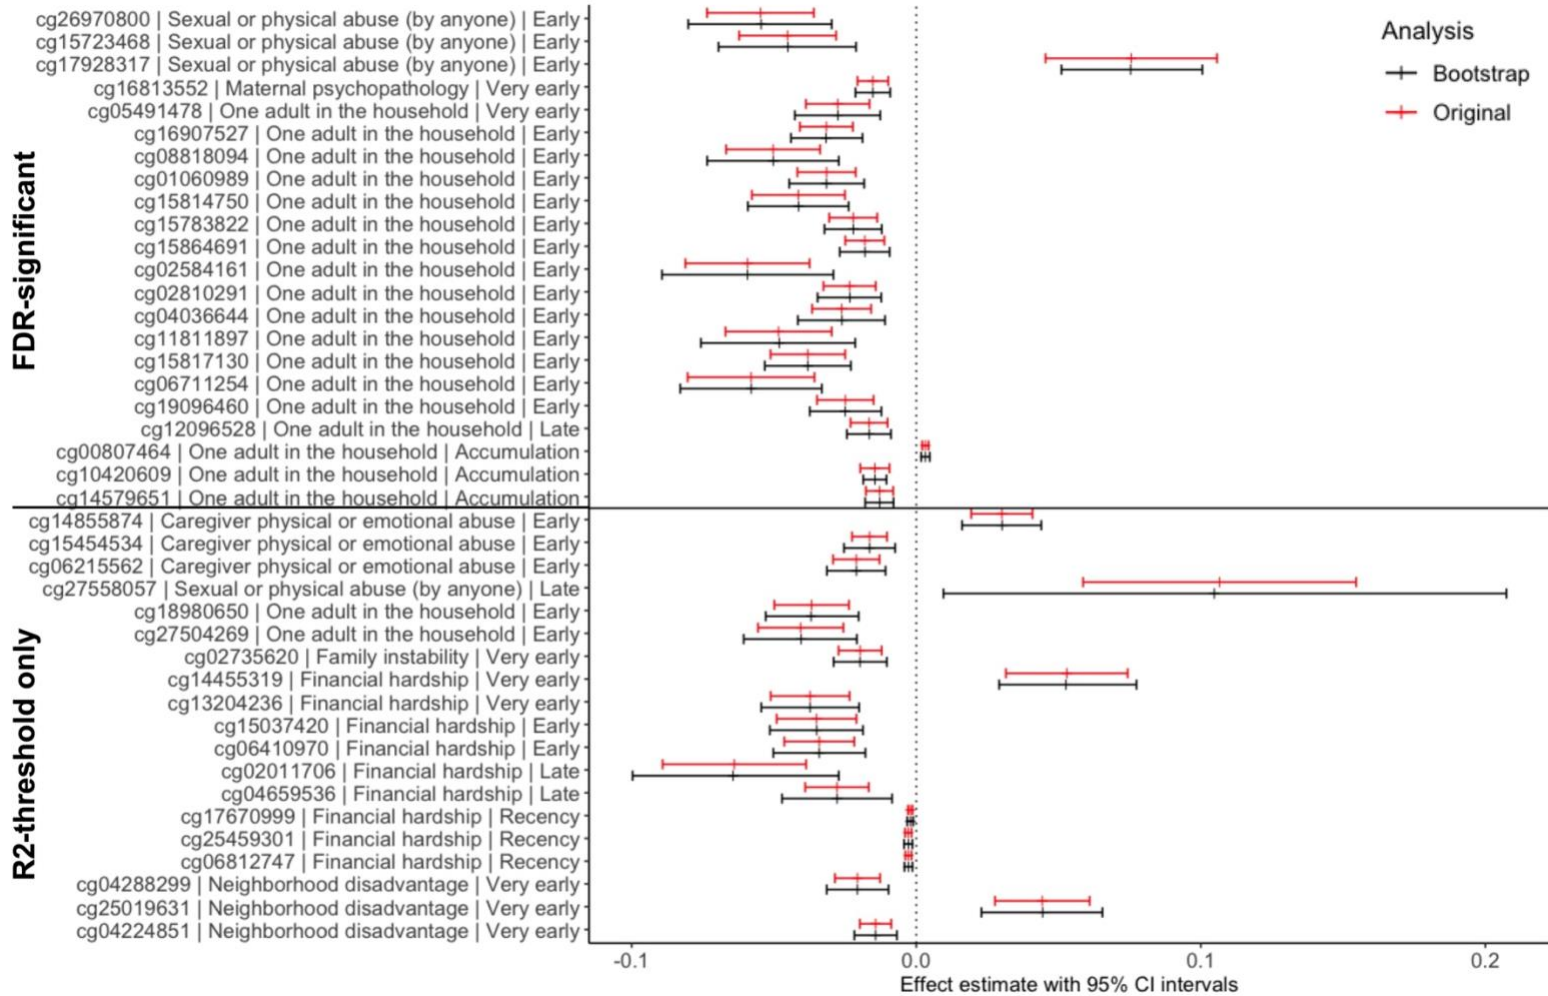

The 41  $R^2$ -threshold associations (of which 22 passed a 5% FDR cutoff) between childhood adversity and DNA methylation at age 15 were internally validated using non-parametric bootstrap analyses. The average effect estimates for the 10,000 bootstraps (black) showed only minor differences from the effects estimates generated in the original analyses of childhood adversity and DNAm (red). 95% confidence intervals are shown.



**Figure S11. Significance levels for mutually-adjusted models of adversity and age 15 DNAm.**

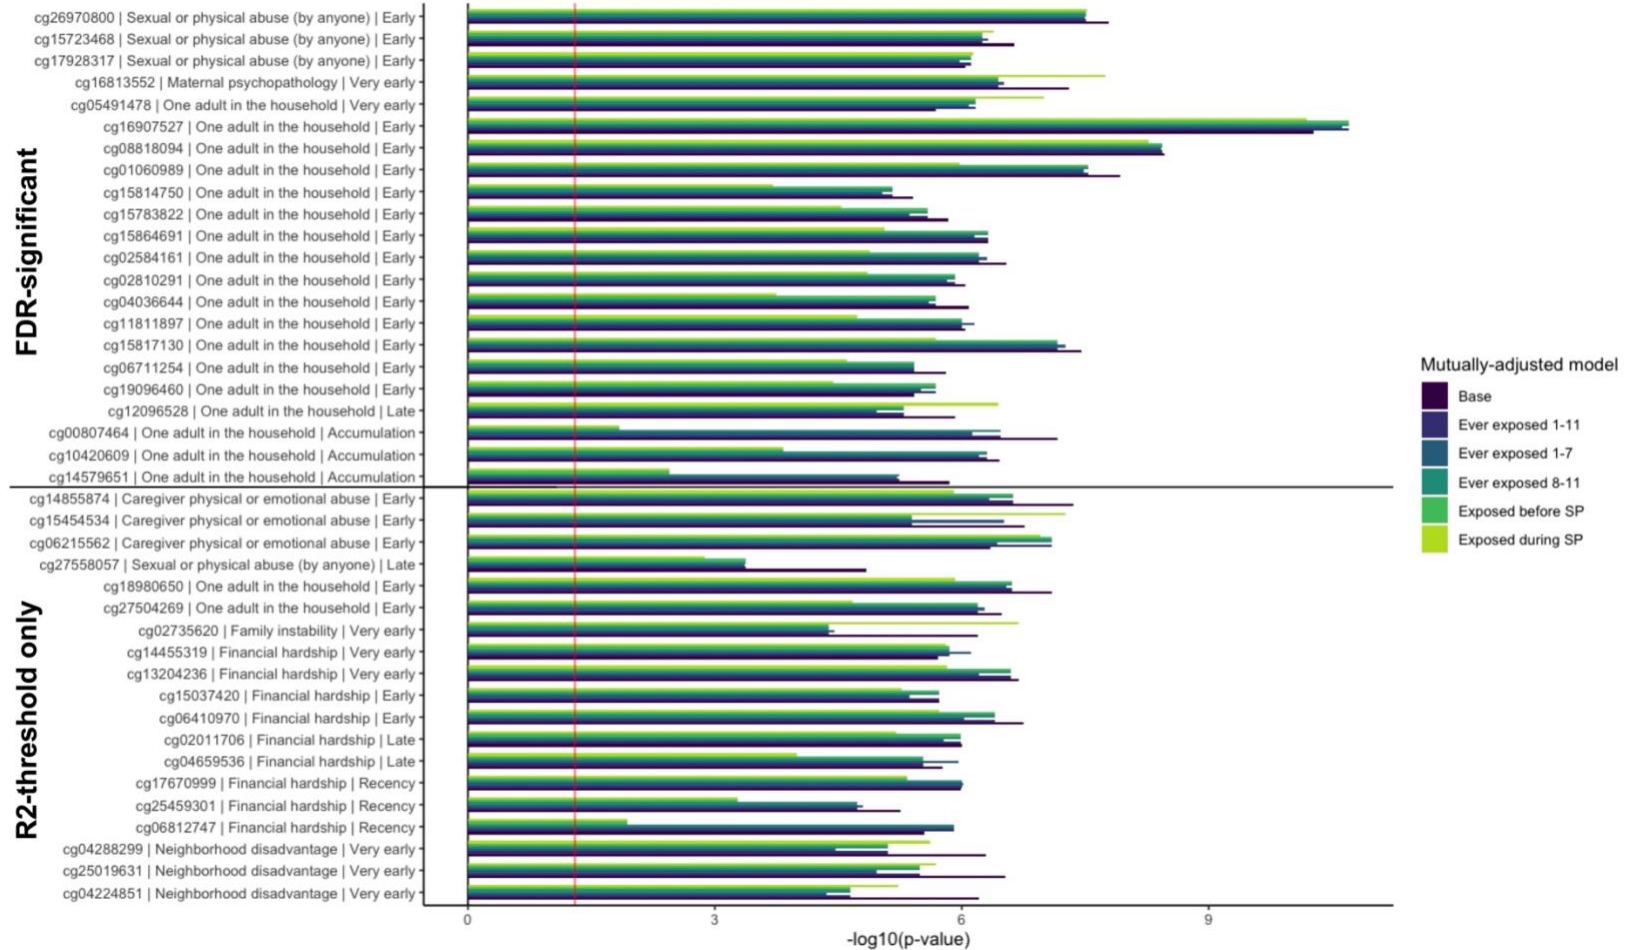

We compared the significance of associations between childhood adversity and DNA methylation (DNAm) at age 15 between the base model and “mutually-adjusted” models, which additionally included other types of childhood adversity. These five mutually-adjusted models included a variable of exposure to any other adversity between age 1-11, age 1-7, or age 8-11. We also tested the effects of exposures to adversity before or during the SLCMA-selected sensitive period; accumulation hypotheses were corrected using the total number of exposures from age 1-11. Significance levels are represented by the  $-\log_{10}$  of p-values, whereby larger values represent smaller p-values (higher significance) and smaller values represent larger p-values (lower significance). The red line shows the  $-\log_{10}$  of  $p=0.05$ . All associated passed a false-discovery rate of 0.05 when correcting for the testing of 22 FDR-significant loci.

**Figure S12. Change in effects estimates for mutually-adjusted models of adversity and age 15 DNAm.**

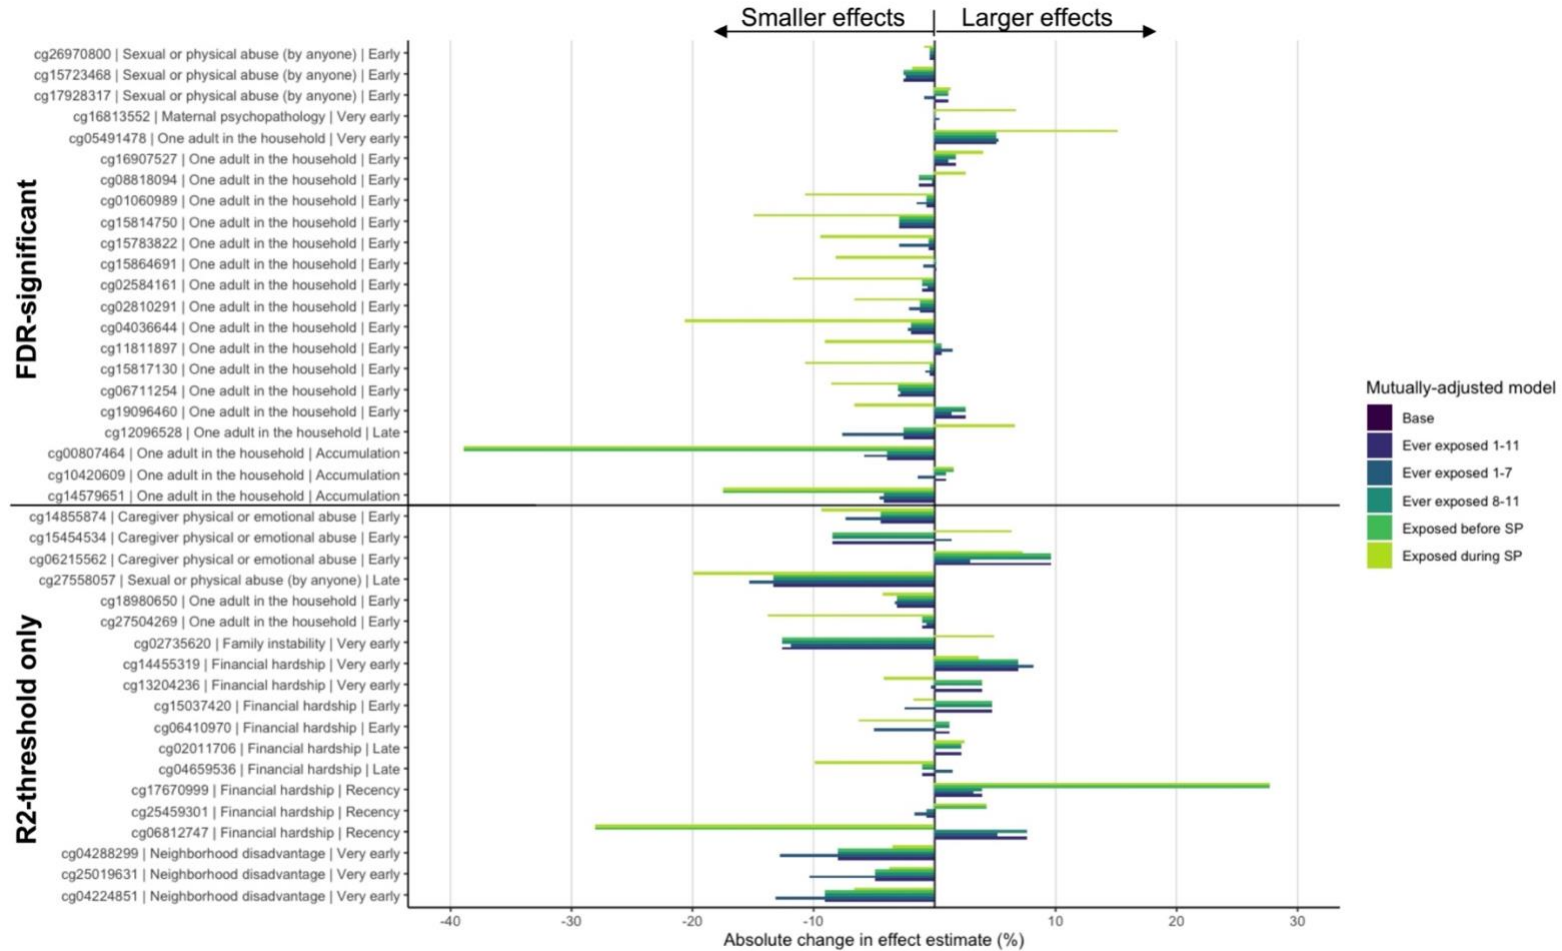

The strength of associations between childhood adversity and DNA methylation (DNAm) at age 15 from the base model were compared to mutually-adjusted models, which additionally included other types of childhood adversity. These five “mutually-adjusted” models included a variable of exposure to any other adversity between age 1-11, age 1-7, or age 8-11. We also tested the effects of exposures to adversity before or during the SLCMA-selected sensitive period (SP); accumulation hypotheses were corrected using the total number of exposures from age 1-11. The majority of associations showed little change in the strength of associations between a given childhood adversity and DNAm when accounting for other exposures, shown as the absolute percent change in effect estimate. However, associations between the accumulation of exposures to one-adult households and DNAm at age 15 were most attenuated in the mutually-adjusted models, showing a 1-40% reduction in the size of the effect estimate. Accounting for exposure that co-occurred during the SLCMA-selected sensitive period also resulted in smaller effect estimates for exposures to one-adult households during early childhood.

**Figure S13. Average differences across mutually-adjusted models of exposure to childhood adversity and DNA methylation at age 15.**

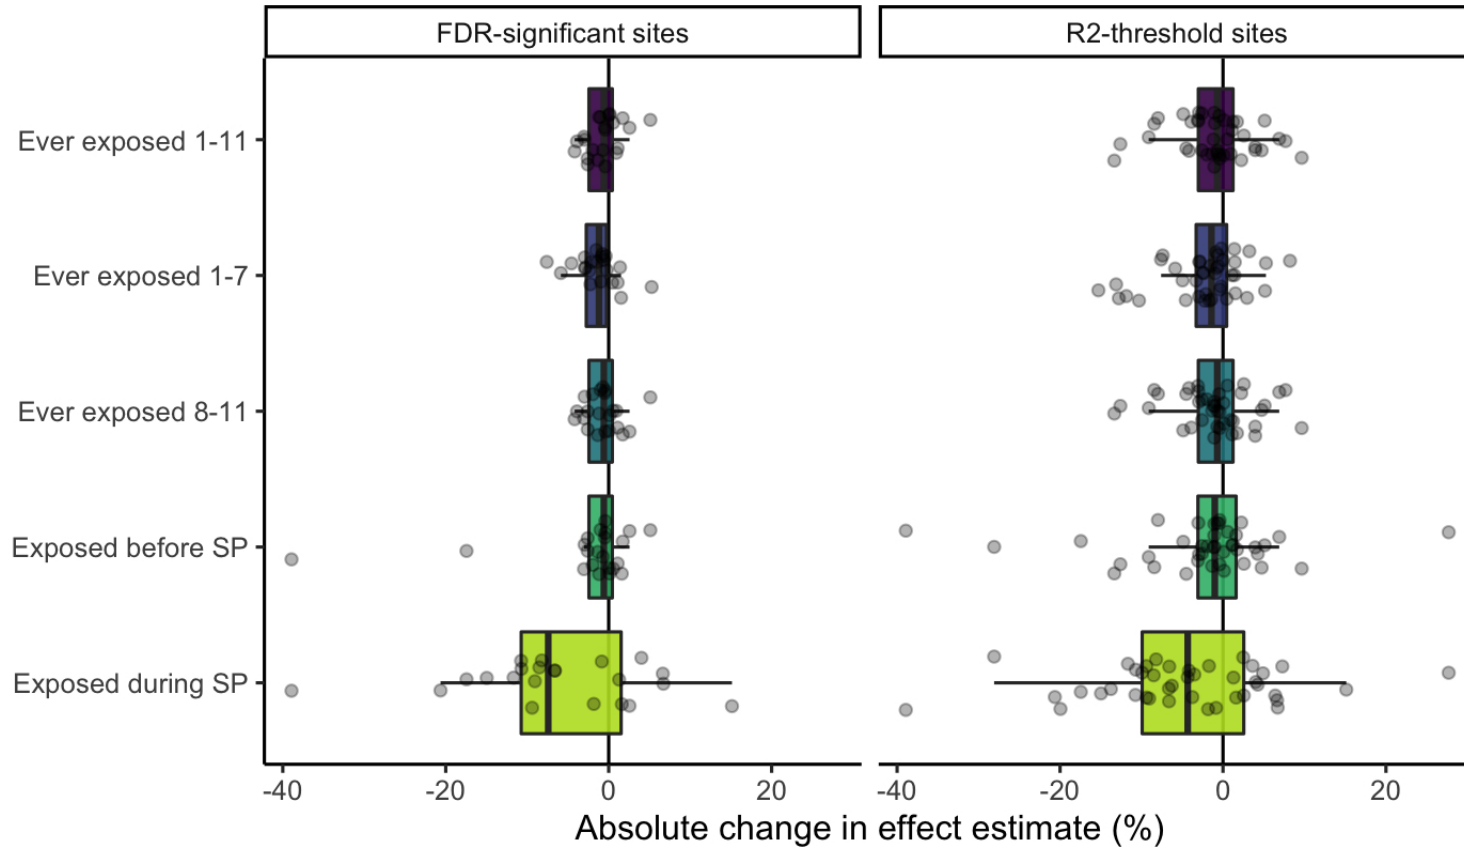

The strength of the associations between childhood adversity and DNA methylation (DNAm) at age 15 from the base model were compared to mutually-adjusted models that accounted for the potential effects of other types of childhood adversity. These “mutually-adjusted” models included a variable of exposure to any other adversity between age 1-11, age 1-7, or age 8-11. We also tested the effects of exposures to adversity before or during the SLCMA-selected sensitive period (SP); accumulation hypotheses were corrected using the total number of exposures from age 1-11. Across all 22 loci FDR-significant, the effects of mutual adjustment were most pronounced when correcting for exposures that occurred during the same sensitive period (mean = -6.3%, range = -38.9% to 15.1%). These effects were similar in the 41 R<sup>2</sup>-threshold loci (mean = -4.7%, range = -38.9% to 27.7%). Each point represents one CpG.

**Figure S14. Summary of replication cohorts**

| Cohort          | Adversity                             | Age (years) |     |     |     |     |     |     |     |      |      |      |    |    |    |    |    |              |
|-----------------|---------------------------------------|-------------|-----|-----|-----|-----|-----|-----|-----|------|------|------|----|----|----|----|----|--------------|
|                 |                                       | 1           | 2   | 3   | 4   | 5   | 6   | 7   | 8   | 9    | 10   | 11   | 12 | 13 | 14 | 15 | 16 | 17           |
| ALSPAC          | Caregiver physical or emotional abuse | 8m          | 21m | 33m | 47m | 61m | 72m |     |     | 108m |      | 132m |    |    |    |    |    |              |
|                 | Sexual or physical abuse              |             | 18m | 30m | 42m | 57m | 69m | 81m | 96m |      |      |      |    |    |    |    |    |              |
|                 | Maternal psychopathology              | 8m          | 21m | 33m |     | 61m | 72m |     |     |      |      | 132m |    |    |    |    |    |              |
|                 | One adult in the household            | 8m          | 21m | 33m | 47m |     |     | 84m | 96m |      | 120m |      |    |    |    |    |    |              |
|                 | Family instability                    |             | 18m | 30m | 42m | 57m | 69m | 81m | 96m |      |      |      |    |    |    |    |    |              |
|                 | Financial stress                      | 8m          | 21m | 33m |     | 61m |     | 84m |     |      |      | 132m |    |    |    |    |    |              |
|                 | Neighborhood disadvantage             | 8m          | 21m | 33m |     | 61m |     | 84m |     |      | 120m |      |    |    |    |    |    |              |
| FFCWS           | Caregiver physical or emotional abuse |             |     | 36m |     | 60m |     |     |     | 108m |      |      |    |    |    |    |    |              |
|                 | Maternal psychopathology              | 12m         |     | 36m |     | 60m |     |     |     | 108m |      |      |    |    |    |    |    |              |
|                 | One adult in the household            | 12m         |     | 36m |     | 60m |     |     |     | 108m |      |      |    |    |    |    |    |              |
|                 | Family instability                    | 12m         |     | 36m |     | 60m |     |     |     | 108m |      |      |    |    |    |    |    |              |
|                 | Financial stress                      | 12m         |     | 36m |     | 60m |     |     |     | 108m |      |      |    |    |    |    |    |              |
| The Raine Study | One adult in the household            | 12m         | 24m | 36m |     | 60m |     |     | 96m |      | 120m |      |    |    |    |    |    | DNAm (blood) |

Summary of the childhood adversity measures available in ALSPAC, Future of Families and Child Wellbeing Study (FFCWS), and the Raine Study, as well as the mean age at DNA methylation (DNAm) collection.

**Figure S15. Replication of one-adult household associations in the Raine Study**

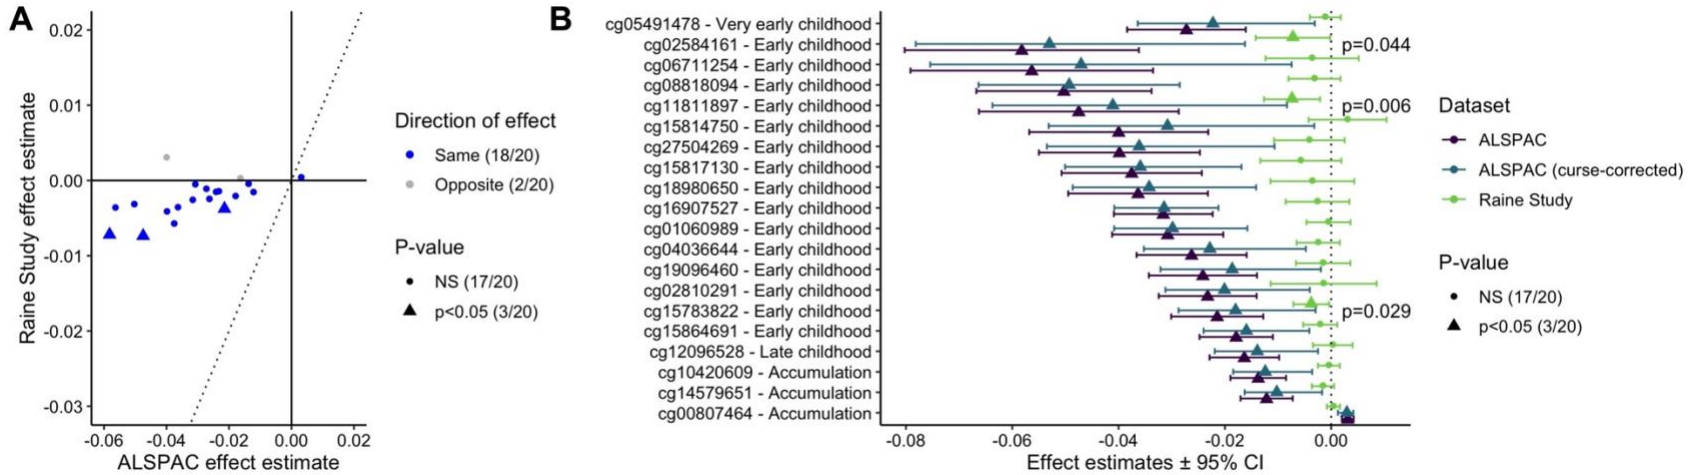

**A)** For 18 of the 20 CpGs associated with one-adult households, the direction of effect estimates was the same (blue) for ALSPAC (x-axis) and the Raine Study (y-axis), which is a greater number than expected under the null hypothesis ( $p = 0.000201$ ). Three CpGs showed nominally significant associations between exposure to one-adult households and DNAm at age 18 in the Raine Study ( $p < 0.05$ ; triangles).

**B)** The size of effect estimates was attenuated in the Raine Study (green) compared to the ALSPAC cohort (purple), with only three CpGs in the Raine Study showing 95% confidence intervals (CI) that did not overlap with zero. When correcting for the winner's curse in ALSPAC (blue), these differences were slightly mitigated, and showed some potential overlaps with estimates from the Raine Study (13 of 20 loci with overlapping 95% CI).

**Figure S16. Replication of associations in the FFCWS cohort**

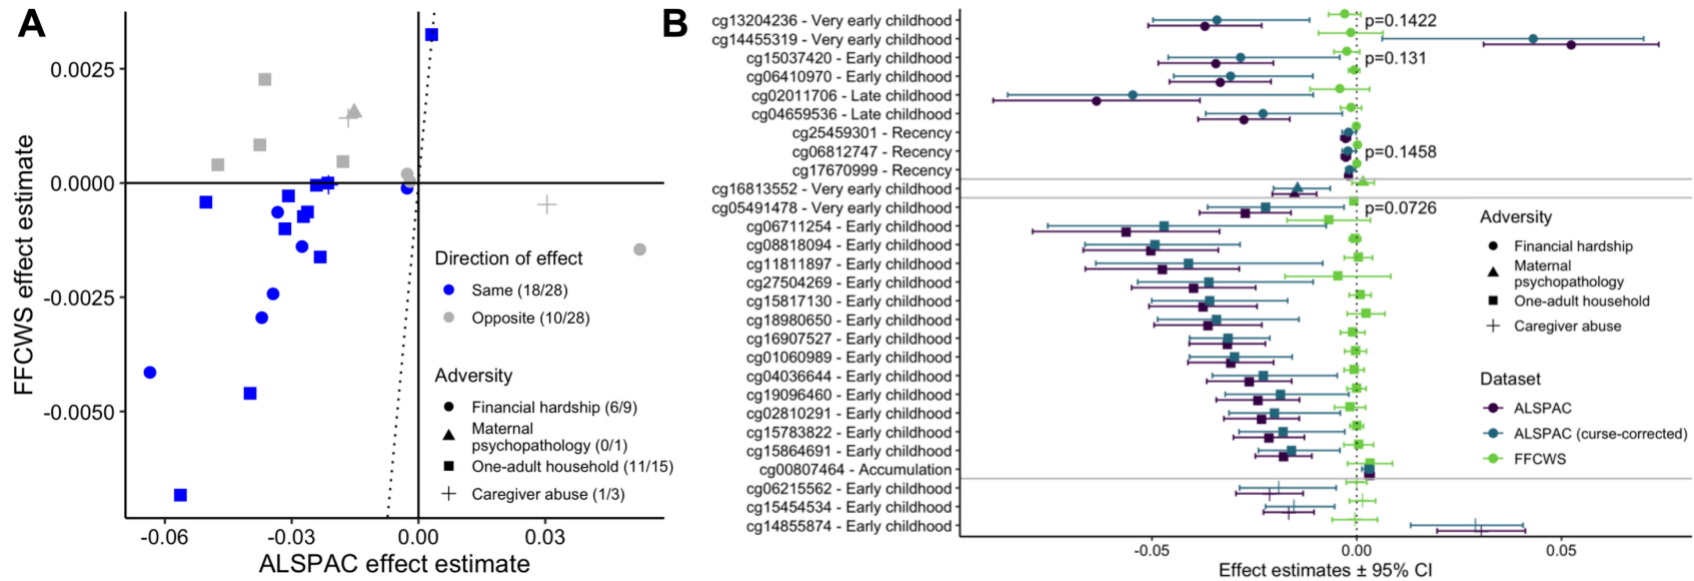

**A)** For 18 of the 28 CpGs associated with four types of childhood adversity, the direction of effect estimates was the same (blue) for ALSPAC (x-axis) and the FFCWS cohort (y-axis), which is ( $p=0.092$ ). Associations with one-adult households showed closer concordance across cohorts, with 11 of 15 CpGs analyzed showing the same direction of effects between cohorts ( $p=0.059$ ).

**B)** The size of effect estimates was attenuated in FFCWS (green) compared to the ALSPAC cohort (purple), with only one CpG showing concordant effects between cohorts (cg00807464, one-adult households, accumulation). When correcting for the winner's curse in ALSPAC (blue), these differences were slightly mitigated, and showed some potential overlaps with estimates from the FFCWS cohort (12 of 28 loci with overlapping 95% CI).



**Figure S17. Population and individual-level stability of DNAm from birth to adolescence of top loci**

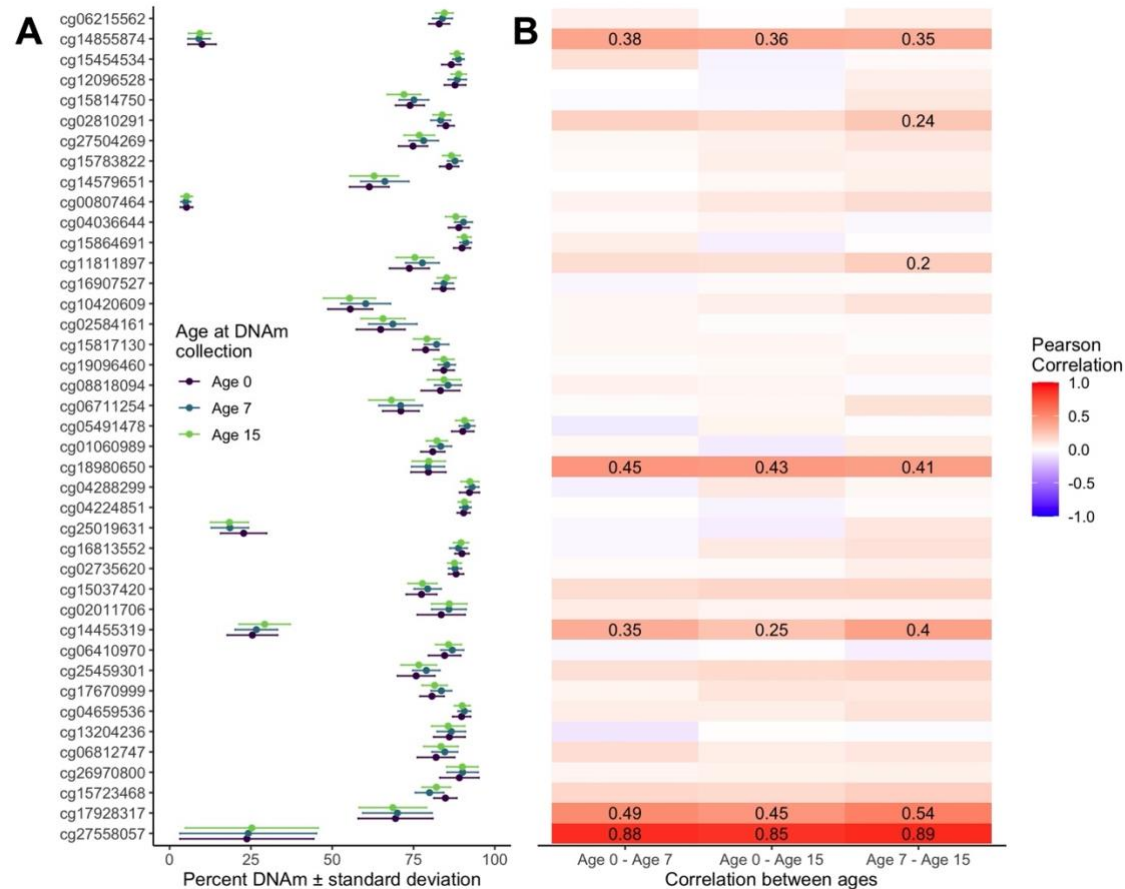

**A)** Mean DNAm and standard deviation of the top 41 loci at birth, age 7, and age 15. Population-level DNAm levels were similar across ages, as were their distributions.

**B)** Individual-level Pearson correlations were low across ages, with only five CpGs showing an  $r > 0.2$  across all three ages. These findings suggest that top loci may be located in regions of the genome that are more variable across development.

**Figure S18. Accounting for potential confounders and mediators of adversity-DNA relationships.**

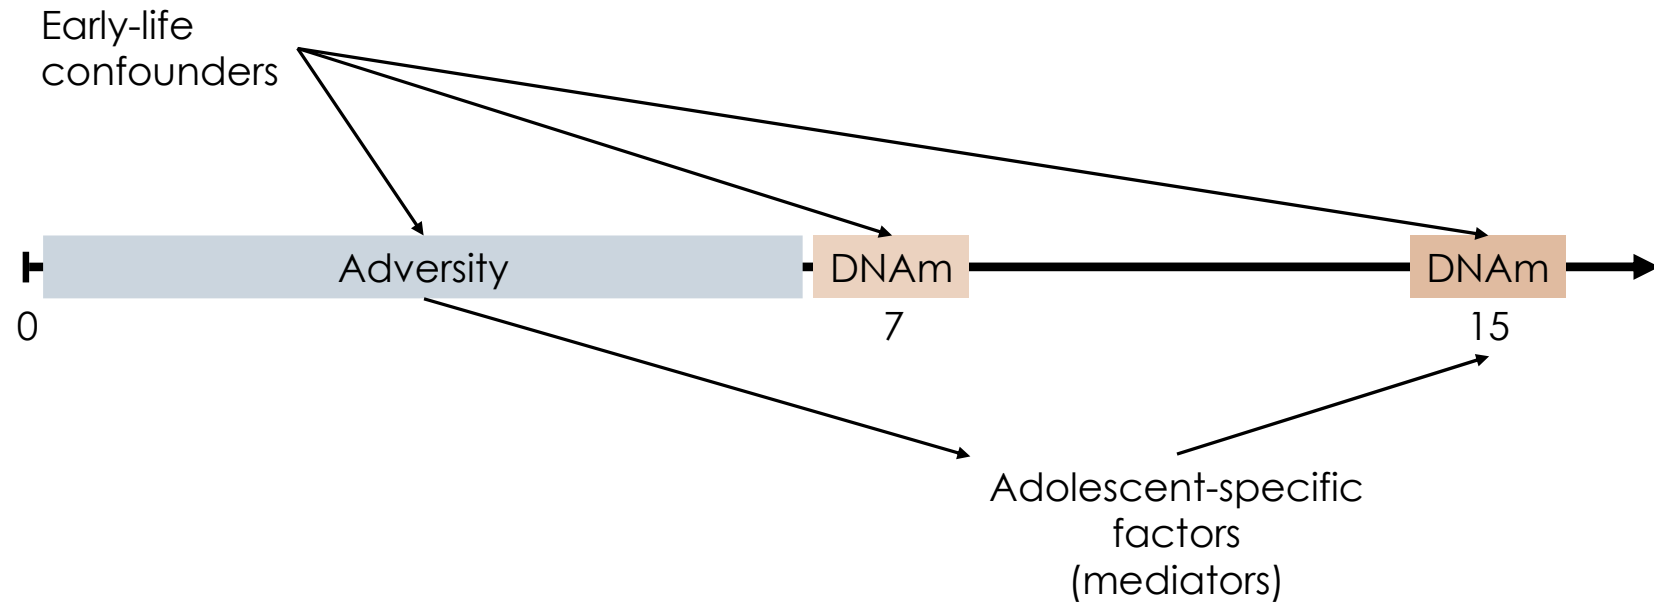

We identified two main types of factors that may have influenced or explain the results of our analyses between time-varying childhood adversity and DNA methylation (DNAm) patterns at age 7 and 15.

First, early-life confounders could have influenced the results of analyses of both age 7 and age 15 DNA methylation levels. These early-life confounders were investigated by including or removing covariates from the regression analyses of the 41 adolescent-specific loci to determine whether they influenced the strength of associations.

Second, adolescent-specific factors, meaning those that occurred after age 7, could only influence associations with age 15 DNA methylation for temporal reasons. Given that confounders must be causally associated with the exposure (adversity) and outcome (DNAm at age 15), adolescent-specific factors were considered as potential mediators of this relationship. In this case, any factors that significantly mediated this relationship would explain why associations between adversity and DNAm were not present at age 7.



**Figure S19. Effects of early-life confounders on associations between adversity and DNAm at age 15.**

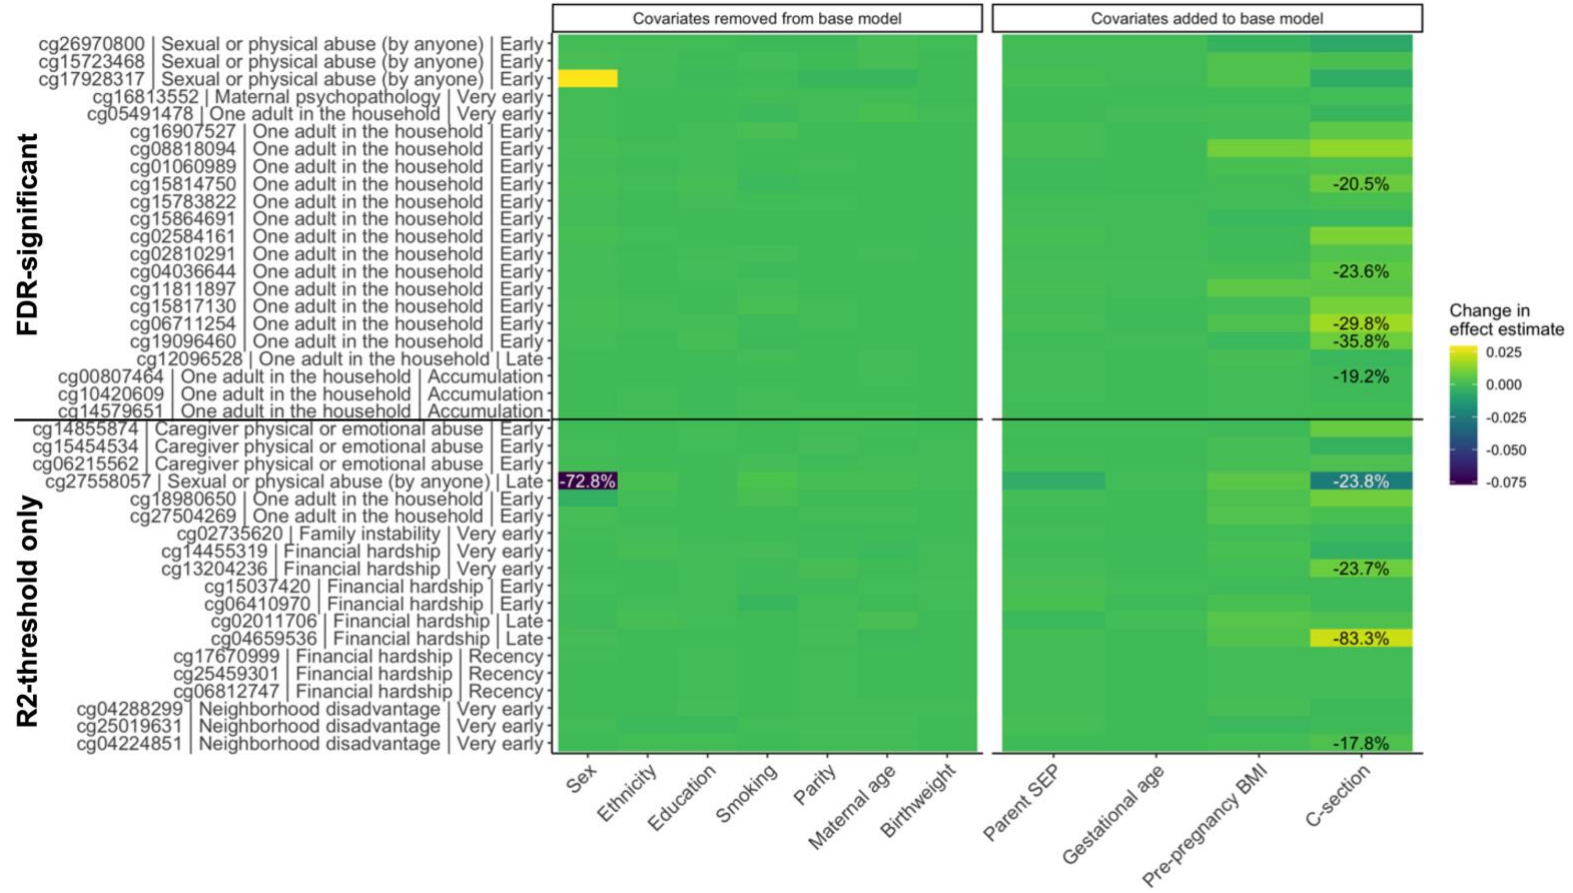

Our base regression model included the following covariates: sex, ethnicity, maternal education at birth, maternal smoking during pregnancy (smoking), parity, maternal age at birth, and birthweight. We investigated the impact of removing these covariates or adding additional ones to our regression analyses, specifically for the CpGs that showed associations between childhood adversity and age 15 DNA methylation.

Removing any one of the main covariates from our analyses resulted in small changes to the effect estimate from the regression model, except for two CpGs on chromosome X (cg17928317; cg27558057), which showed large changes in effect when sex was not included in the model.

When adding potential confounders to the regression model, we again found small changes in effect estimates, with only four CpGs showing a >10% change in effect upon including of maternal pre-pregnancy body mass index (BMI). Parental socio-economic status at birth (SES parent) and gestational age in weeks did not influence the strength of associations. Including delivery method (C-section) as a covariate induced broader changes in effect estimates.

Percent changes in effect estimates are shown for CpGs that no longer met a Bonferroni-adjusted  $p < 0.05$  (for 41 tests) after covariate removal/addition.



**Figure S21. Age at pubertal onset did not mediate childhood adversity-DNA relationships.**

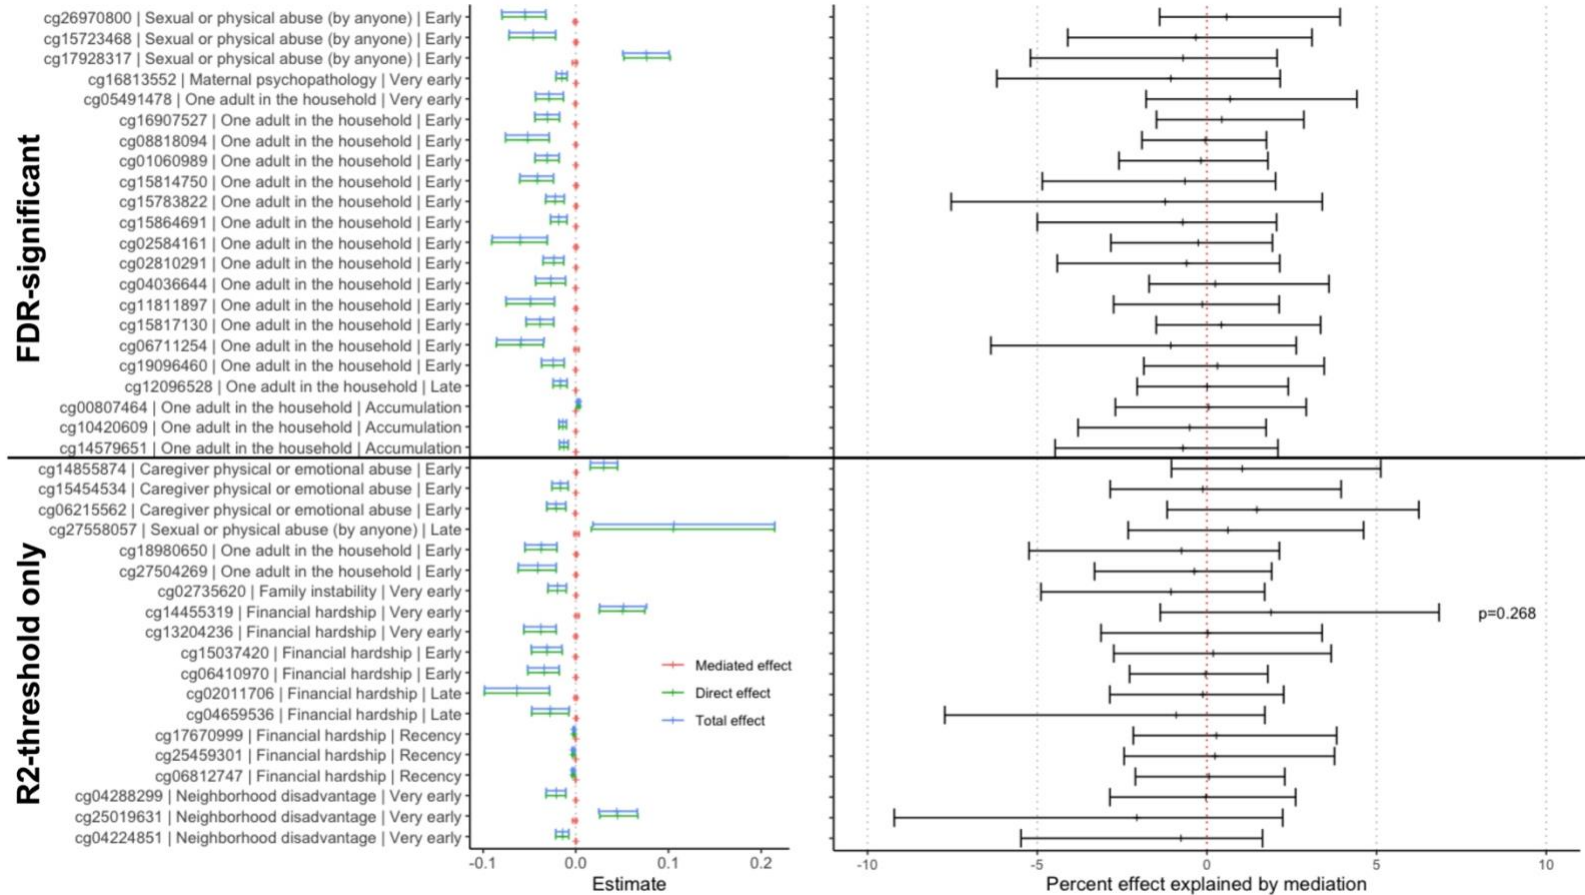

Mediation by the age of pubertal onset, estimated using peak height velocity, was tested for the loci associated with childhood adversity and DNA methylation at age 15. The average causal mediation effect (mediated effect, red; left panel) was close to zero for all CpGs, explaining very little of the association between childhood adversity and DNA methylation levels. None of the estimated mediated effects were significant ( $p > 0.05$ ). The lowest p-value belong to cg14455319 ( $p = 0.268$ ). Y-axis is noted as “CpG | childhood adversity | SLCMA hypothesis”.

**Figure S22. Body mass index at age 15 putatively mediated childhood adversity-DNAm relationships.**

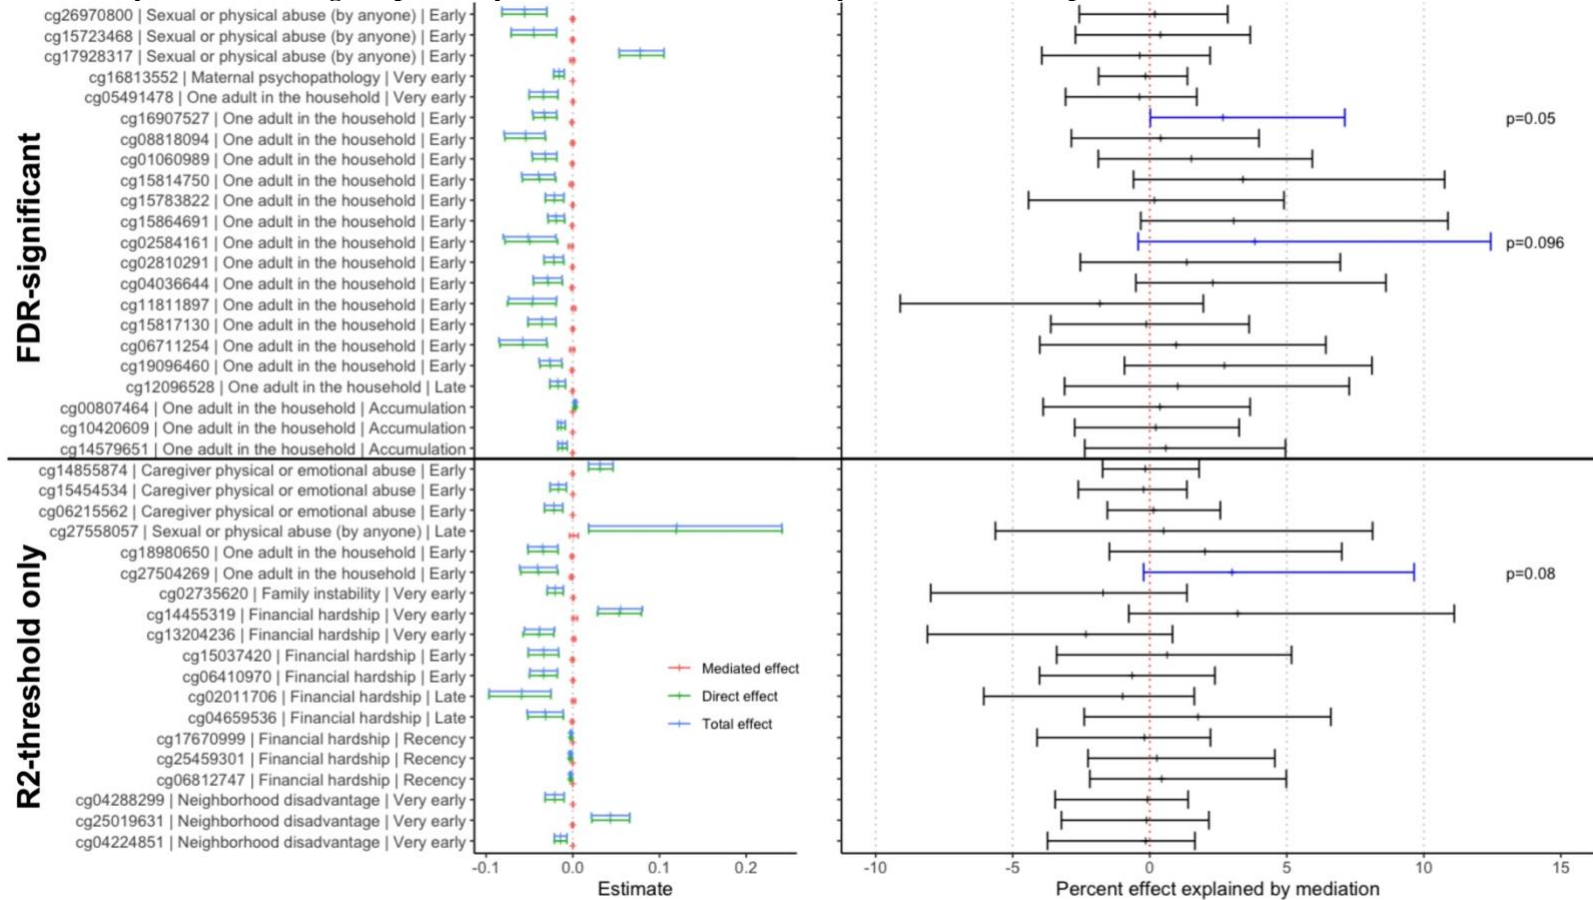

Mediation by body mass index, measured at age 15, was tested for the loci associated with childhood adversity and DNA methylation at age 15. The average causal mediation effect (mediated effect, red; left panel) was near zero for all CpGs, explaining very little of the association between childhood adversity and DNA methylation levels. However, one locus (cg16907527) showed nearly significant mediated effects, explaining 2.67% of the relationship between childhood adversity and DNA methylation ( $p=0.050$ ). Two other loci showed causal mediation with  $p<0.1$ , shown in blue (right panel). No associations were significant after correction for multiple-testing at a false-discovery rate  $<0.05$ . Y-axis is noted as “CpG | childhood adversity | SLCMA hypothesis”.



**Figure S23. C-reactive protein levels at age 15 putatively mediated childhood adversity-DNA methylation relationships.**

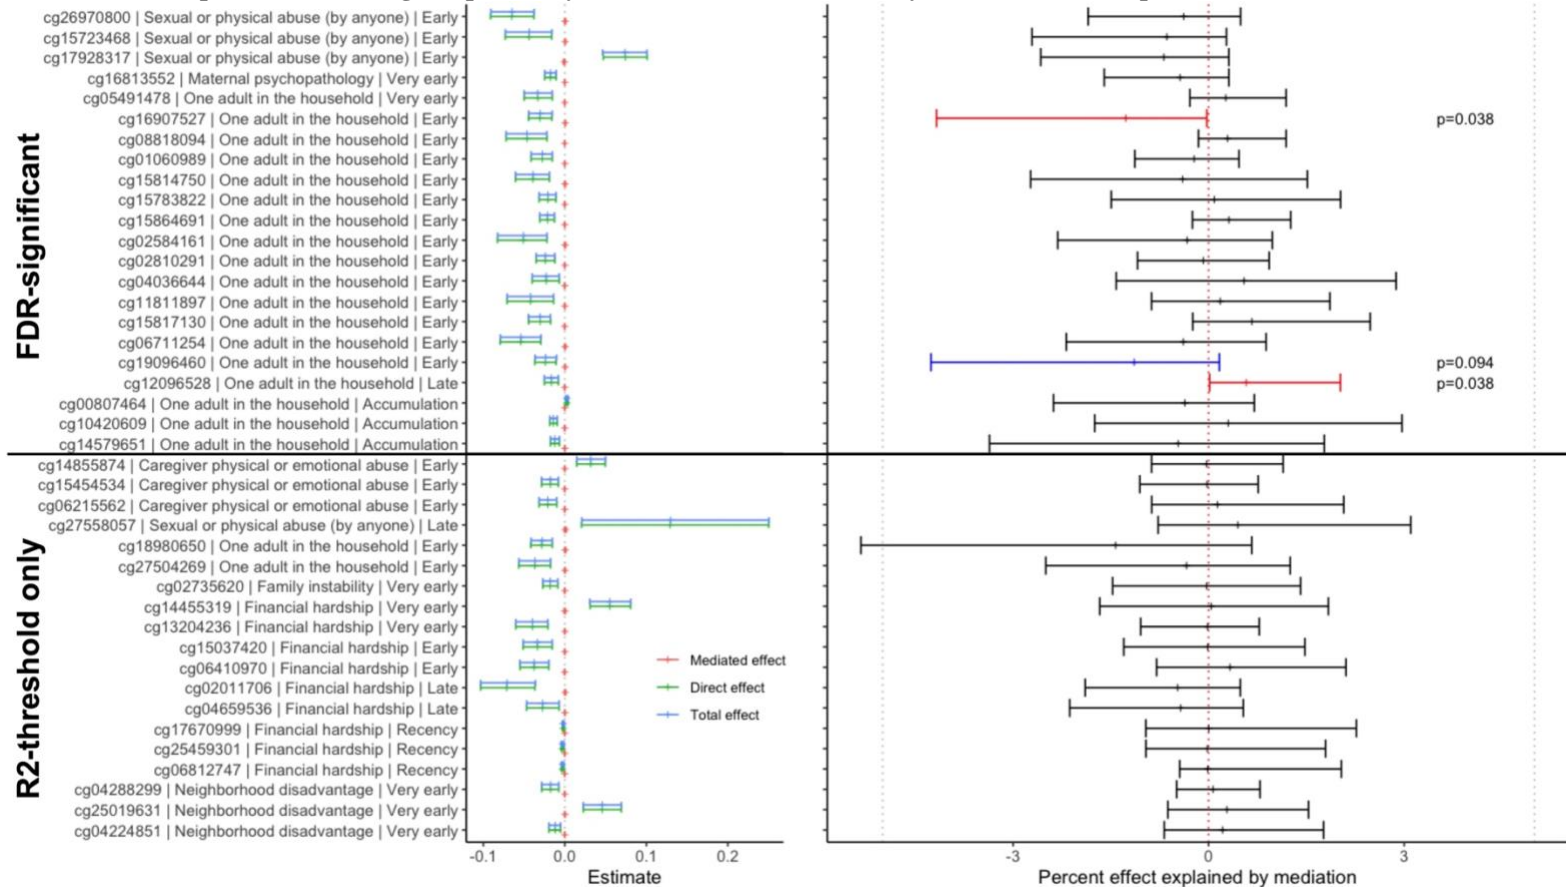

Mediation by the levels of C-reactive protein, measured at age 15, was tested for the loci associated with childhood adversity and DNA methylation at age 15. **A)** The average causal mediation effect (mediated effect, red; left panel) was close to zero for all CpGs, explaining very little of the association between childhood adversity and DNA methylation levels. **B)** Two of the estimated mediated effects were significant ( $p < 0.05$ , red; cg16907527, *VEGFA*, -1.27% relationship explained; cg12096528, *SLC25A41*, -1.14% relationship explained) and one locus showed a putative causal mediation effect with ( $p < 0.1$ , blue; cg19096460, *HERC3*). However, none of these passed multiple-test correction. Y-axis is noted as “CpG | childhood adversity | SLCMA hypothesis”.

**Figure S24. The adolescent’s daily smoking at age 15 did not mediate childhood adversity-DNA relationships.**

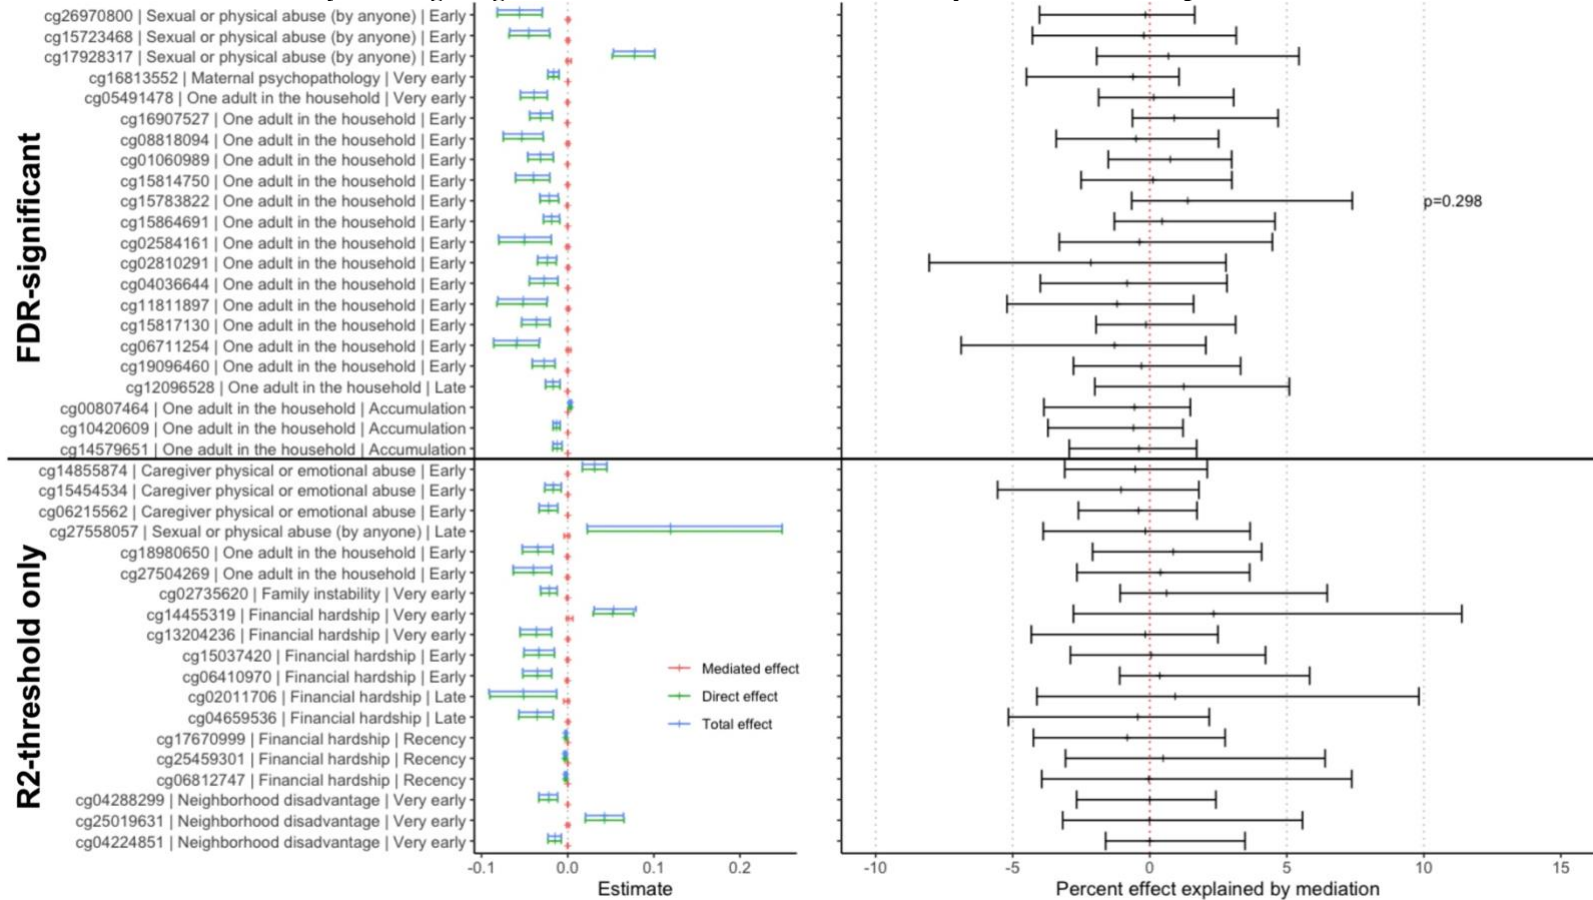

Mediation by smoking behavior at age 15, categorized as the adolescent smoking cigarettes on a daily basis, was tested for the 23 loci significantly associated with childhood adversity and DNA methylation at age 15. The average causal mediation effect (mediated effect, red; left panel) was close to zero for all CpGs, explaining very little of the association between childhood adversity and DNA methylation levels. None of the estimated mediated effects were significant ( $p > 0.05$ ). The lowest p-value belonged to cg15783822 ( $p = 0.298$ ). Y-axis is noted as “CpG | childhood adversity | SLCMA hypothesis”.

Figure S25. Selection metrics for the number of types of DNAm trajectories across development.

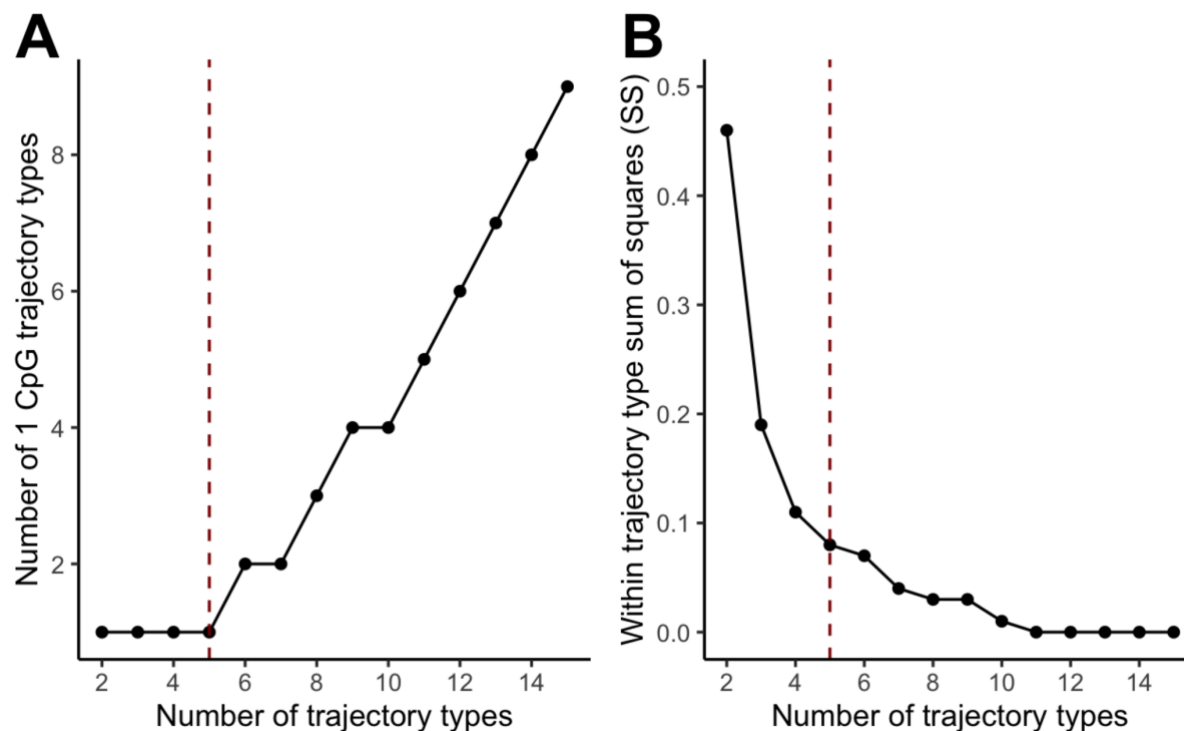

**A)** Number of trajectory types that were composed of a single CpG, with the x-axis showing the total number of different trajectory types. From the 2 to 5 trajectory solutions, only one trajectory type was composed of a single CpG.

**B)** The mean within trajectory type sum of squares shown by number of total trajectories, where lower values reflect closer observations within clusters (i.e., more homogenous clusters). This metric showed an almost complete drop-off by the model with 5 trajectory types, suggesting that the good model fit was achieved.

The red dashed line represents the number of total trajectory types selected for final analyses (5), based on the number of trajectory types with single loci and elbow of the minimal sum of squares plot.

**Figure S26. Hierarchical clustering of CpGs based on a five-trajectory model.**

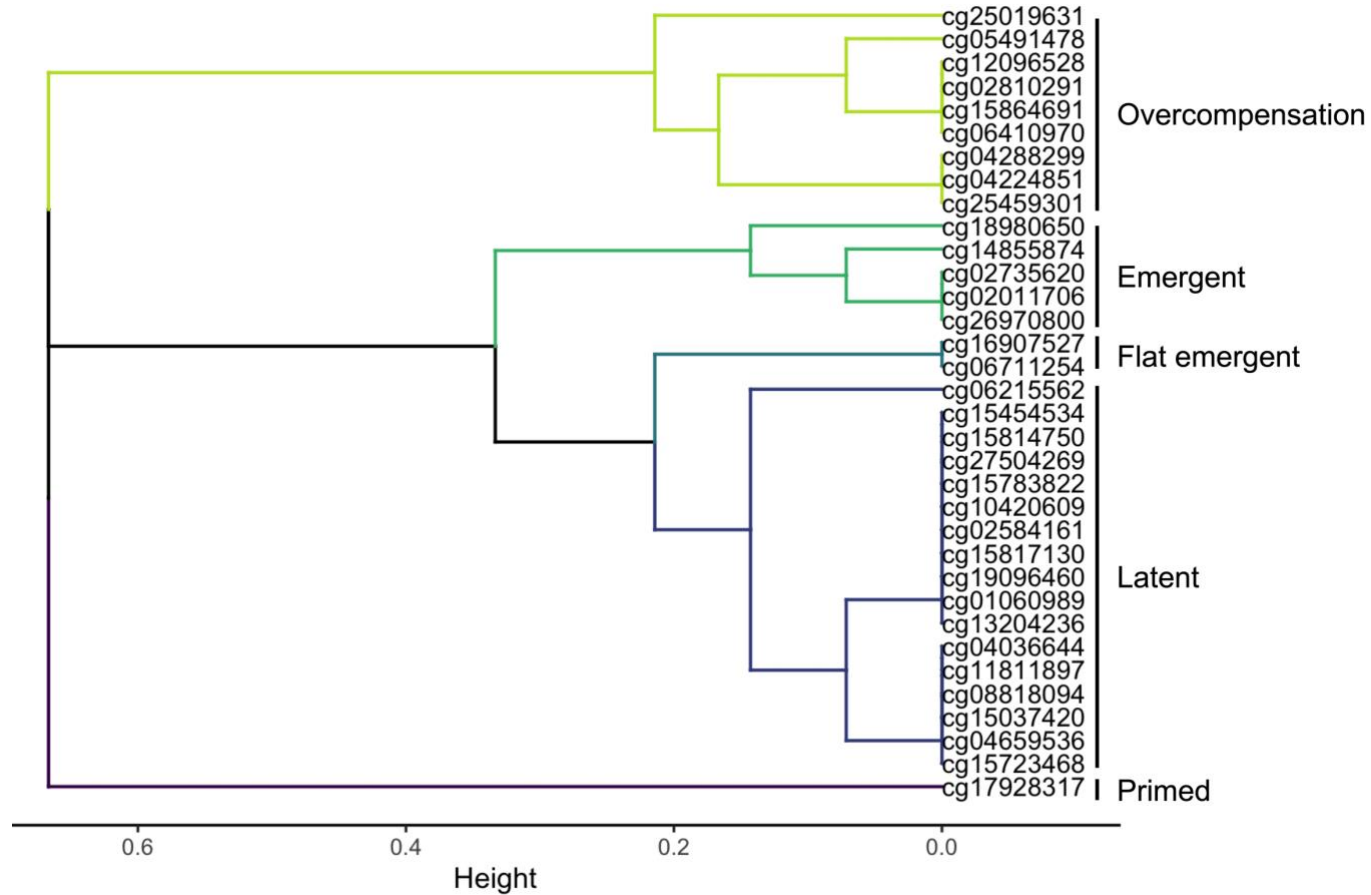

Hierarchical clustering of age 15 loci using Tukey summary statistics for group-by-age interactions revealed five additional types of longitudinal DNAm patterns beyond those that did not show significant group-by-age interactions. These types of trajectories ranged in size from 1 (primed) to 17 CpGs (latent).



**Figure S27. Distinguishing features between the six types of DNA methylation trajectories.**

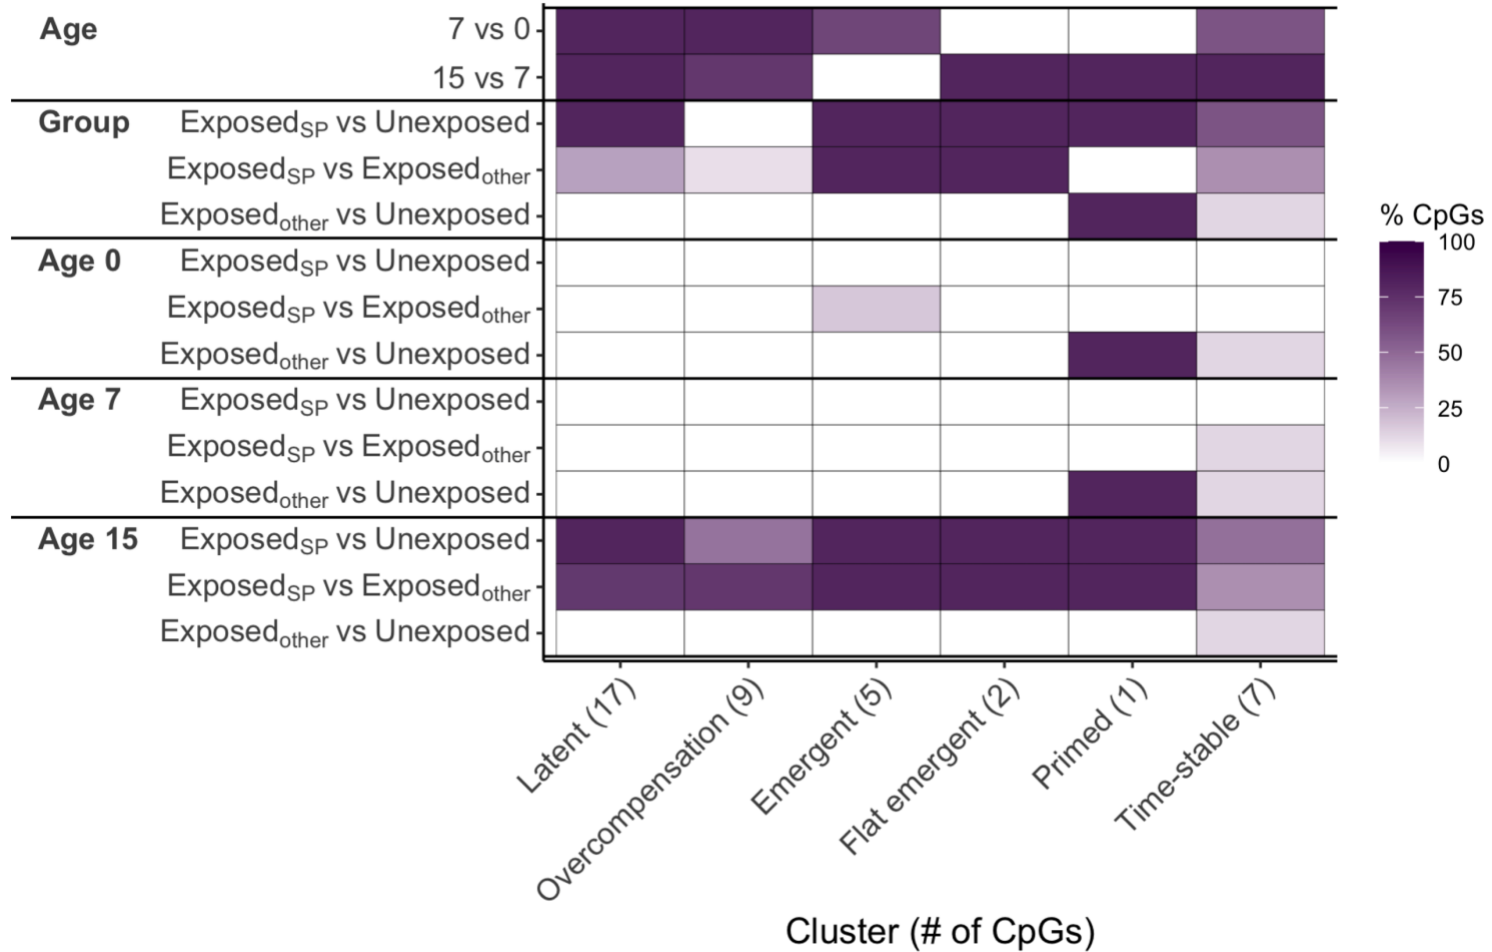

Summary of the significant Tukey summary statistics used to differentiate the six types of DNA methylation trajectories. The fraction of loci with a significant contrast for each type of trajectory is shown (lighter color indicates more loci, or a greater fraction of trajectories). The summary statistics on the y-axis show whether the contrast was significant for: 1) mean differences between ages (age 0, age 7, age 15), 2) mean exposure group differences *across* all ages (exposed during the period identified from the SLCMA [exposed<sub>SP</sub>]; exposed during other period [exposed<sub>other</sub>], or unexposed), and 3) exposure group differences *within* each age.

**Figure S28. Types of DNAm trajectories for the 41 loci identified at age 15.**

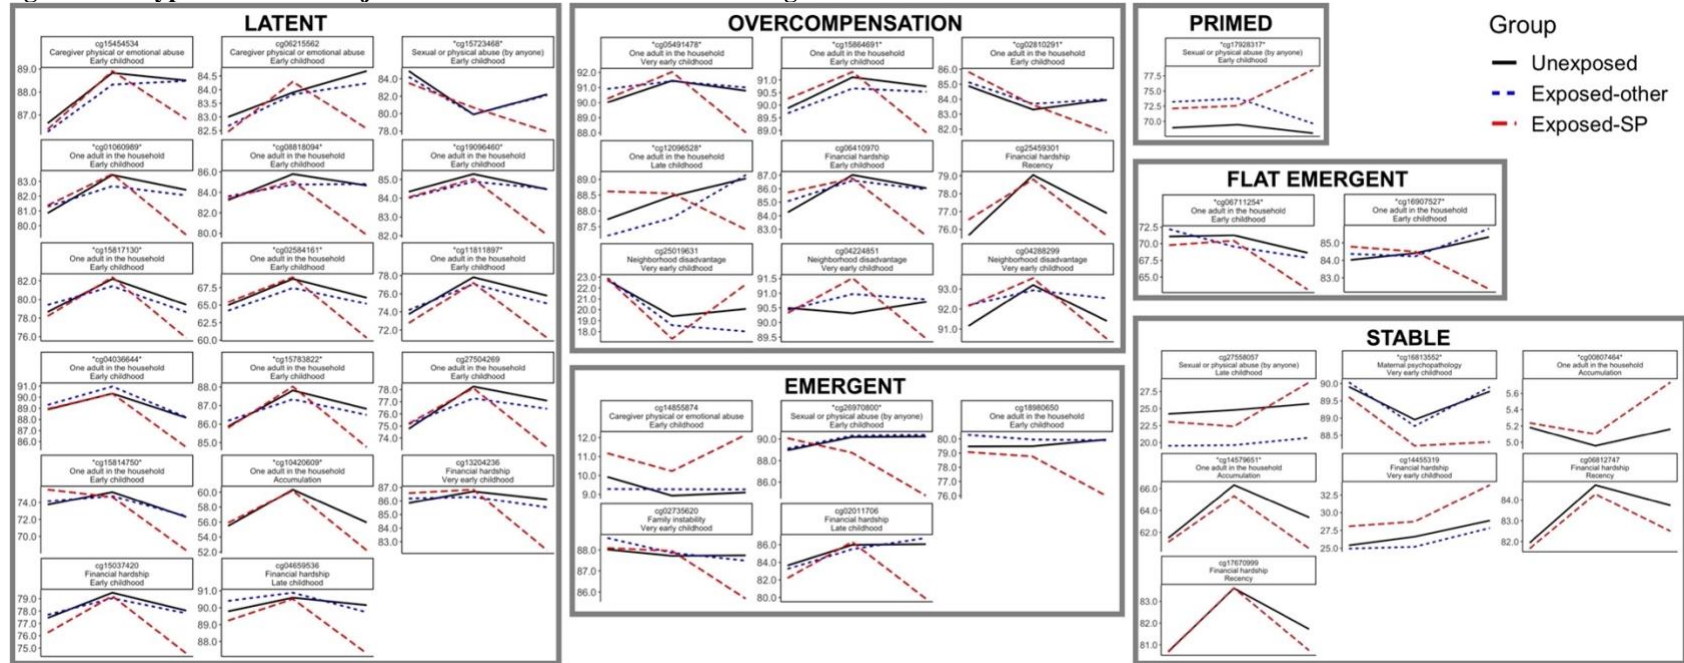

Shown here are the cell-type corrected DNA methylation (DNAm) values on the y-axis and the age at DNAm collection on the x-axis for the 41 loci identified from the SLCMA analyses of age 15 DNAm. Of the 41 loci, seven did not show significant exposure group by age effects (group-by-age effects) and are shown as “Stable”. From the 34 loci with significant group by age effects, we identified five distinct types of DNAm trajectories and responses to childhood adversity across development. These DNAm trajectories were identified based on mean exposure group differences *across* ages, mean age differences *across* exposure groups, and exposure group differences at specific ages. Exposure groups were as follows: 1) exposed to adversity *during* the period identified from the SLCMA (exposed-SP; red); 2) exposed to adversity *outside* the period identified from the SCLMA (exposed-other; blue); or 3) unexposed to adversity across development (black). The childhood adversity and hypothesis selected in the SLCMA are shown in the header of each individual plot. Waves of DNAm collection are shown on the x-axis (age 0, 7, and 15 at the inflection points) and percent DNAm is shown on the y-axis.

Figure S29. Types of trajectories based on the significance threshold of top loci.

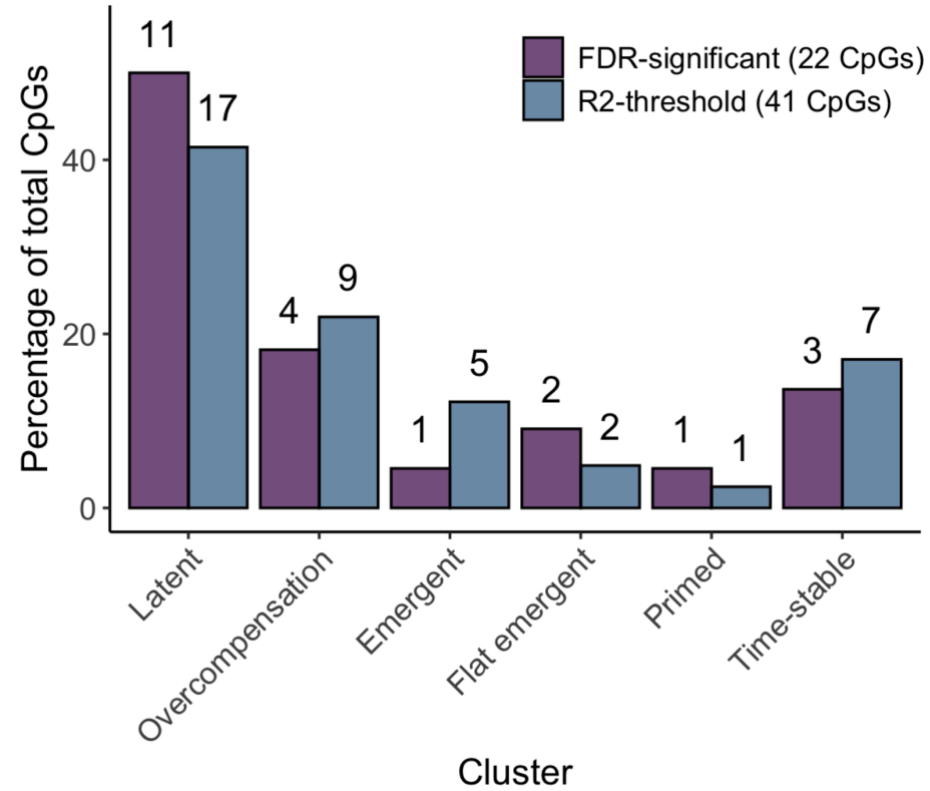

The fraction of CpGs falling within different types of DNA methylation trajectories across development did both vary based on selection thresholds based on and  $FDR < 0.05$  or and  $R^2 \geq 0.035$  ( $\chi^2 = 1.92$ ,  $p = 0.86$ ). However, there were generally more CpGs in the latent class and fewer in the emergent class for the FDR-significant loci compared to the R<sup>2</sup>-threshold loci.

**Figure S30. Enrichment of top adolescent loci within the threat versus deprivation paradigm.**

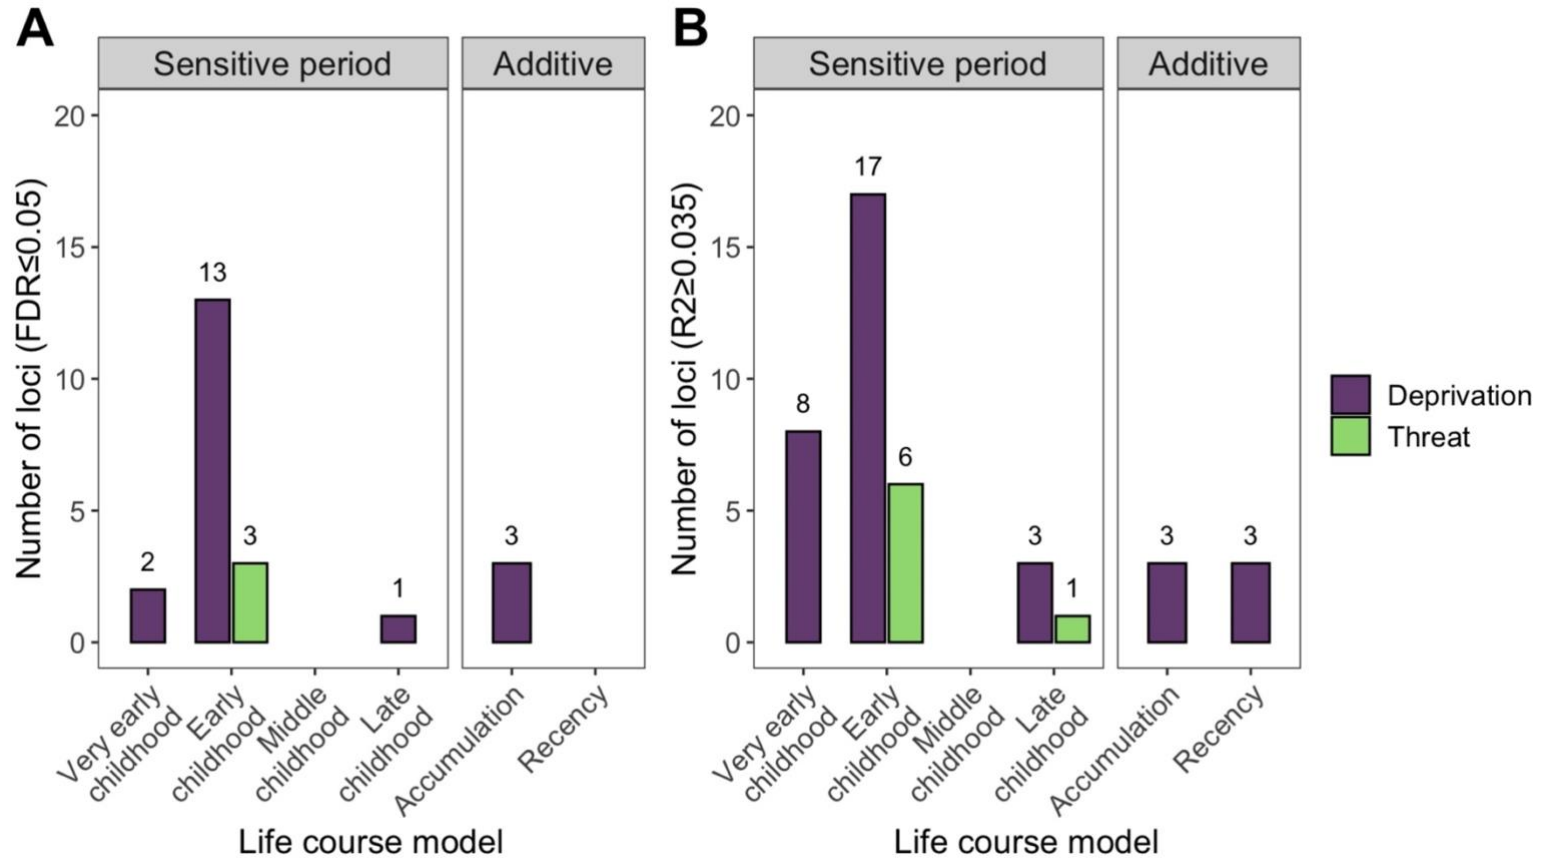

The life course theoretical models were split by sensitive periods (i.e., exposure to adversity during specific childhood periods) or additive models (i.e., accumulation or recency of exposures). Colors represent the two adversity paradigms, threat versus deprivation. **A**) Of the 22 loci identified at a false-discovery rate (FDR) <math><0.05</math>, most loci were associated with exposure to deprivation during early childhood. **B**) Of the 41 loci identified at an
